# Supplementary material for: Developmental roles of 21 Drosophila transcription factors are determined by quantitative differences in binding to an overlapping set of thousands of genomic regions
Source: Springer Nature journal article supplement (doi:10.1186/gb-2009-10-7-r80), 2009-07-23

### BCD 2 PWM enrichment down ranks

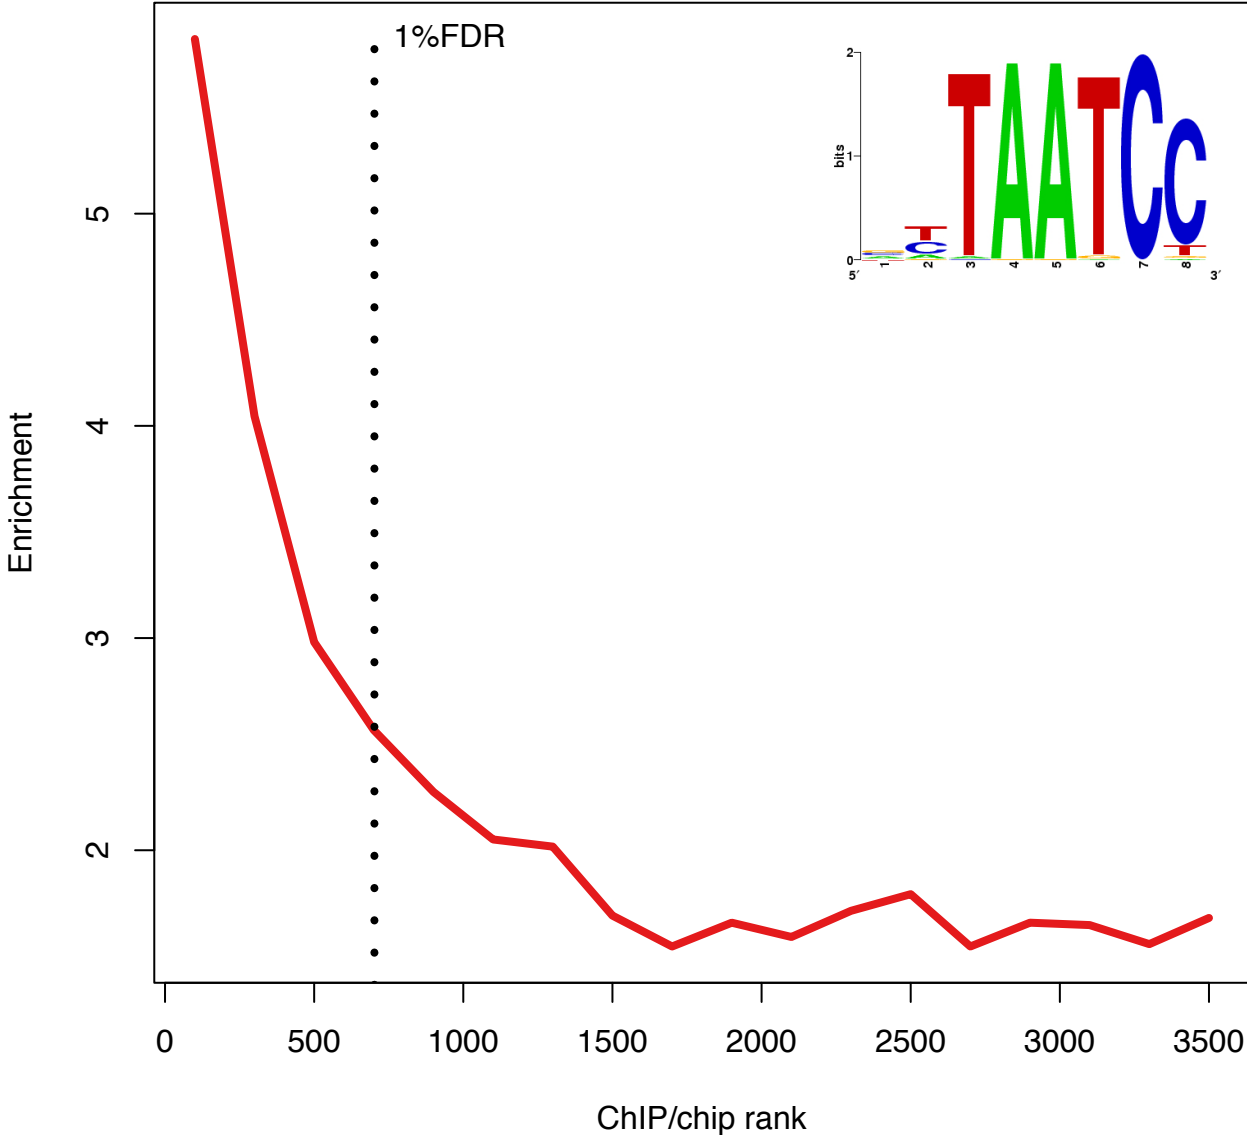

### CAD 1 PWM enrichment down ranks

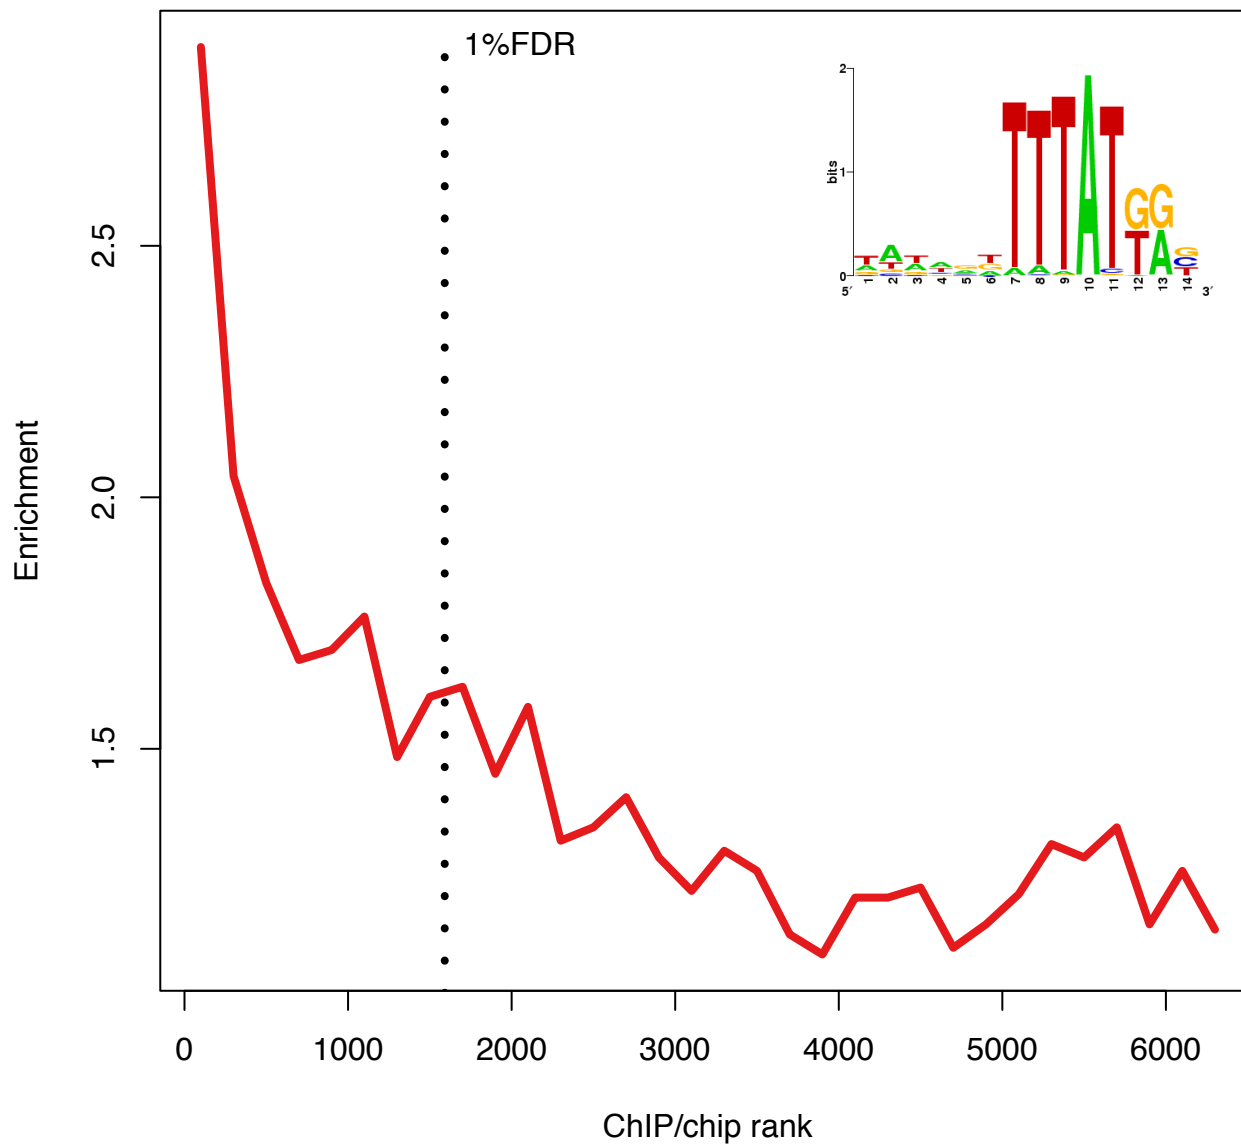

## **D insufficient in vitro binding data**

# **Da insufficient in vitro binding data**

### DL 3 PWM enrichment down ranks

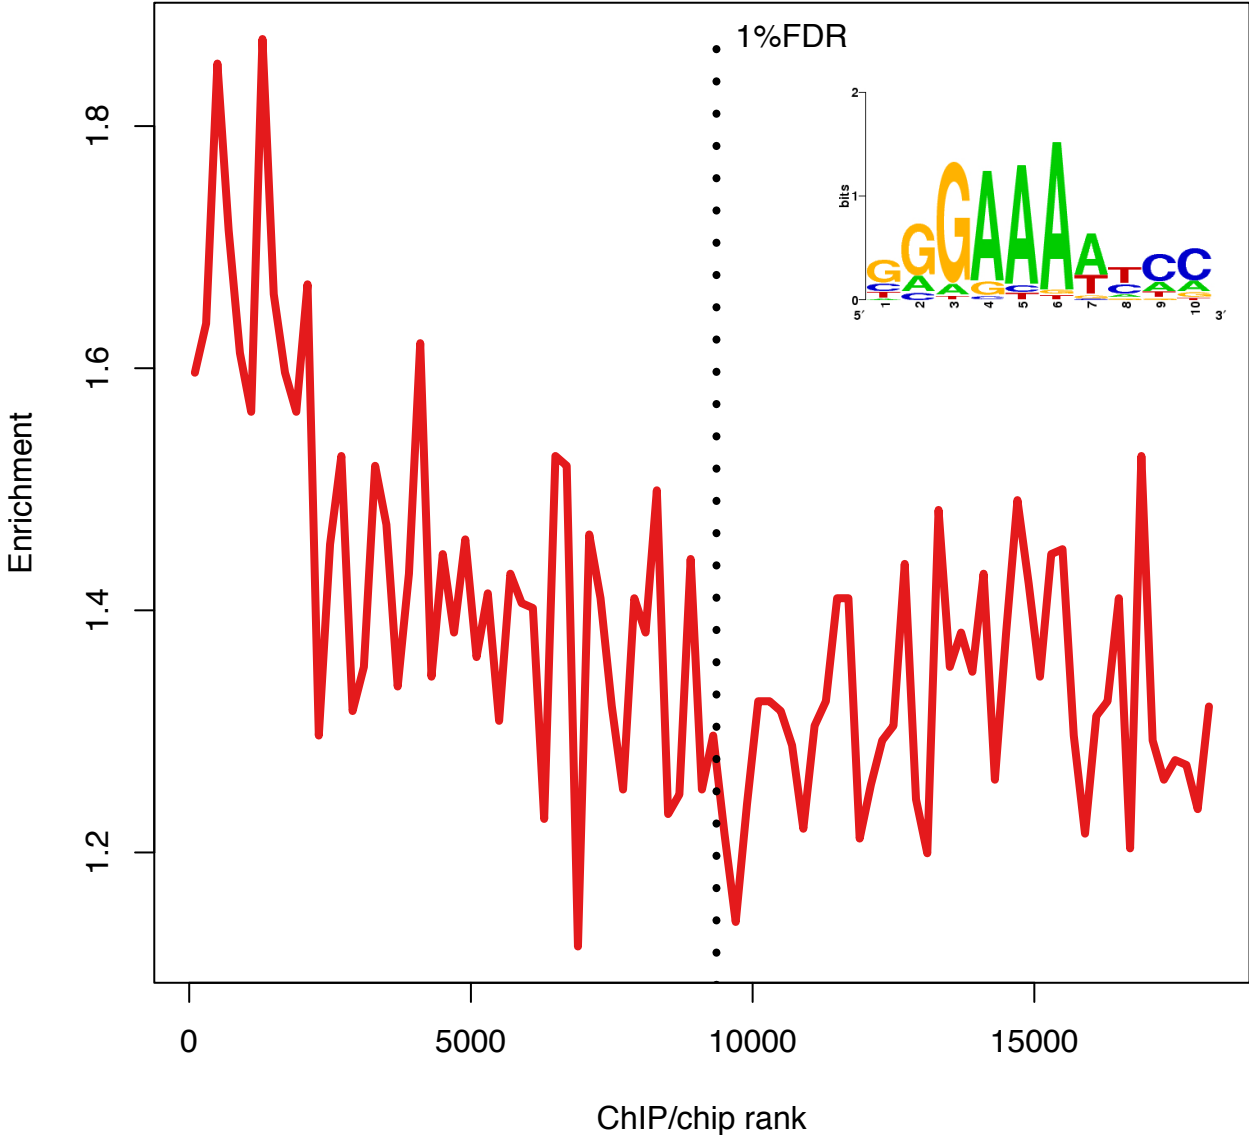

### FTZ 3 PWM enrichment down ranks

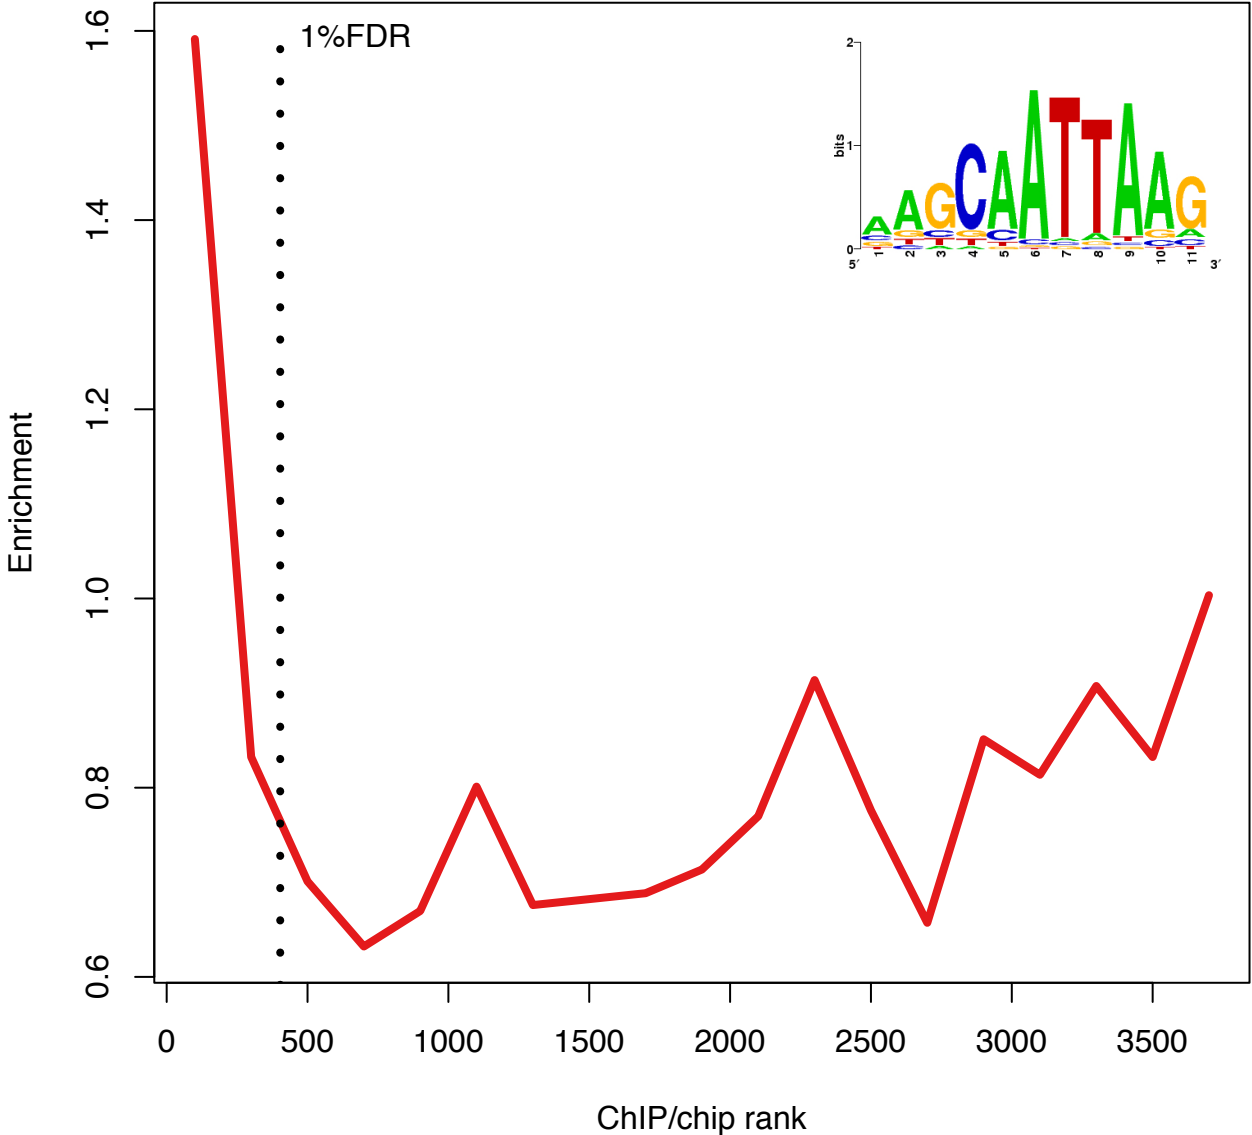

### GT 2 PWM enrichment down ranks

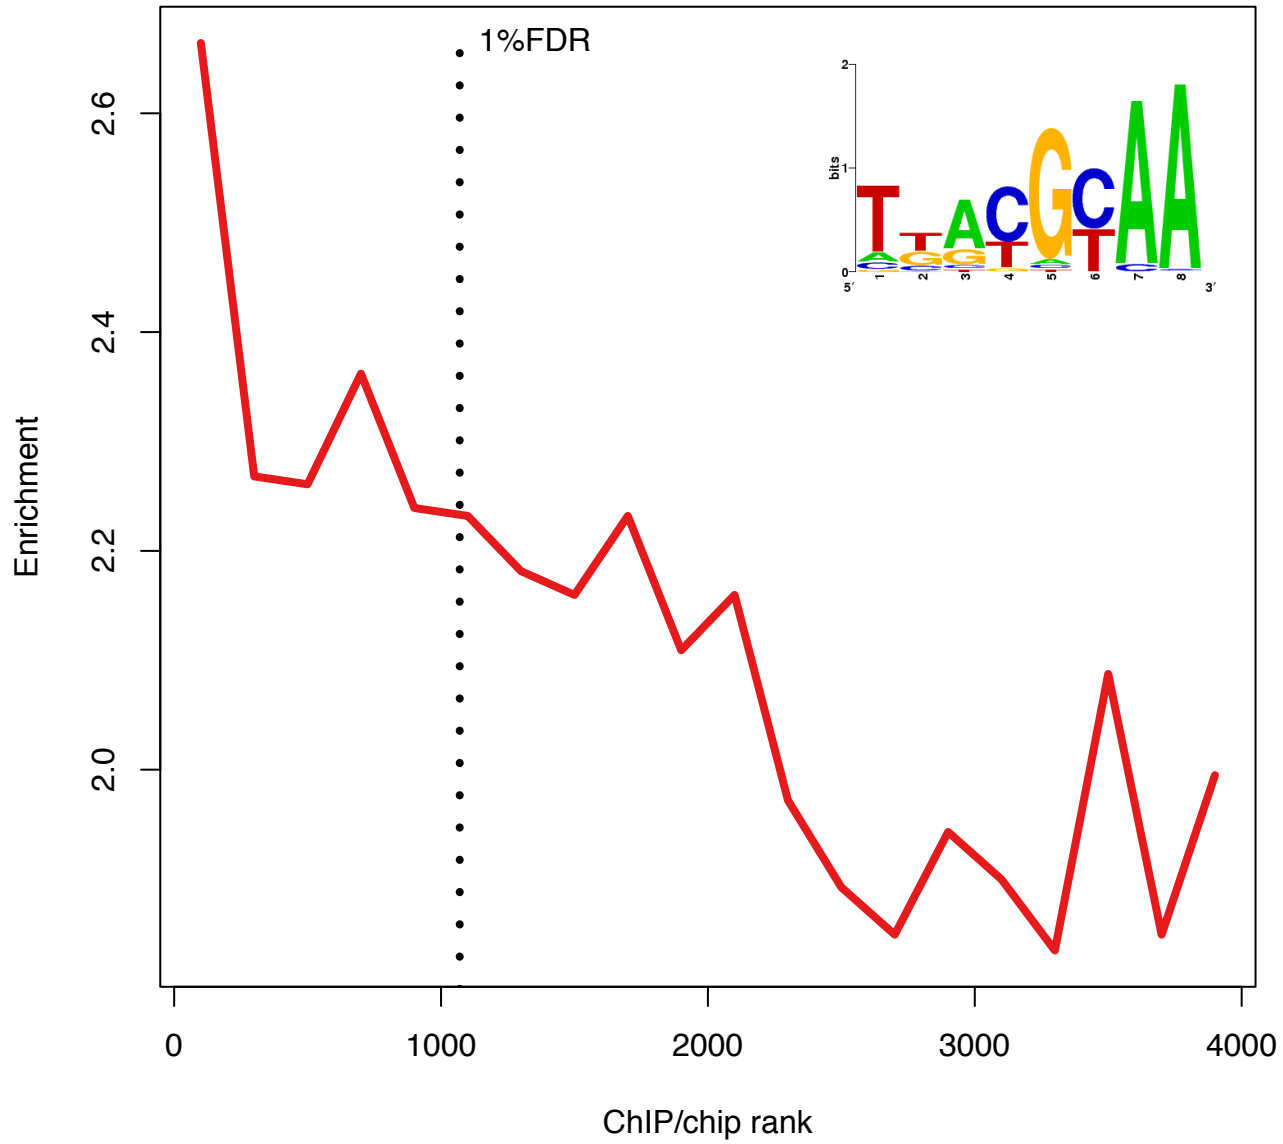

### HB 1 PWM enrichment down ranks

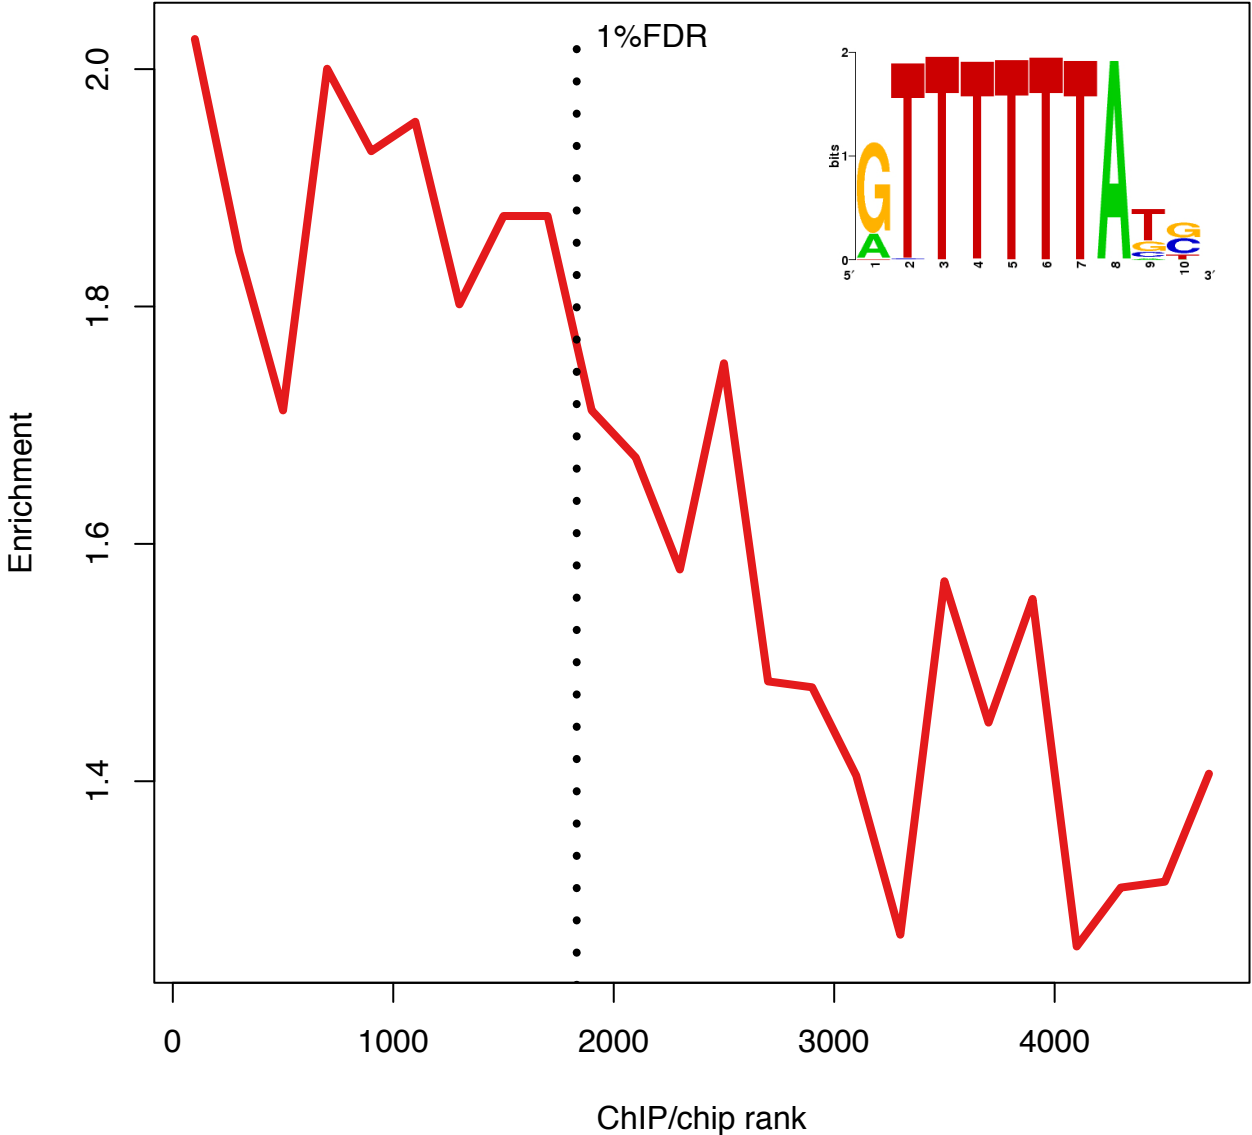



# **HKB insufficient in vitro binding data**

### HRY 2 PWM enrichment down ranks

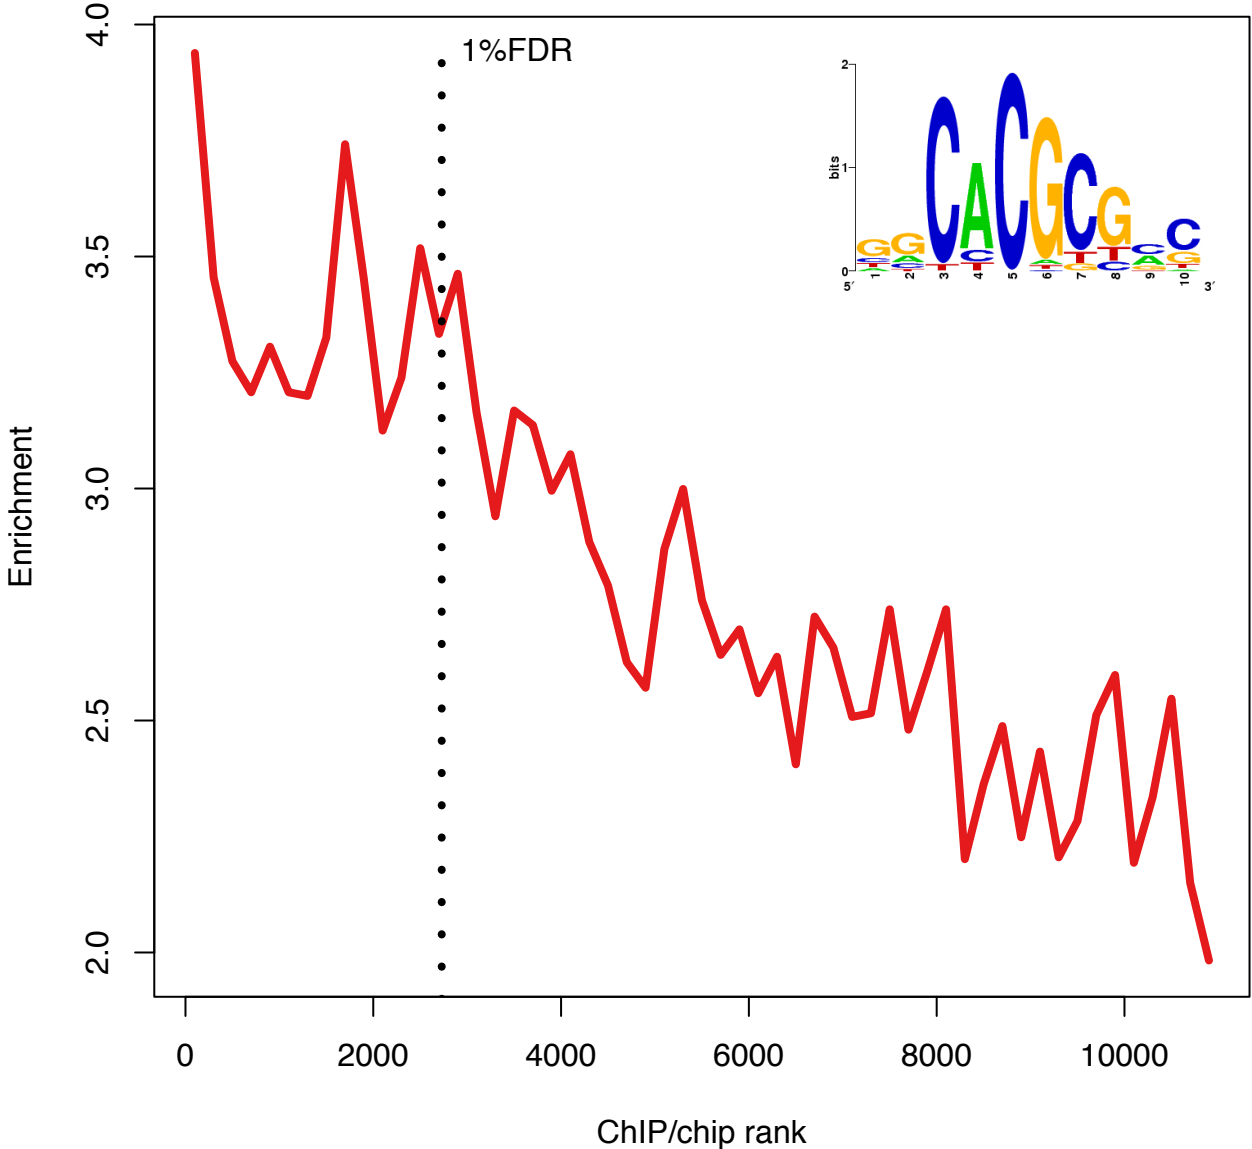

### KNI 2 PWM enrichment down ranks

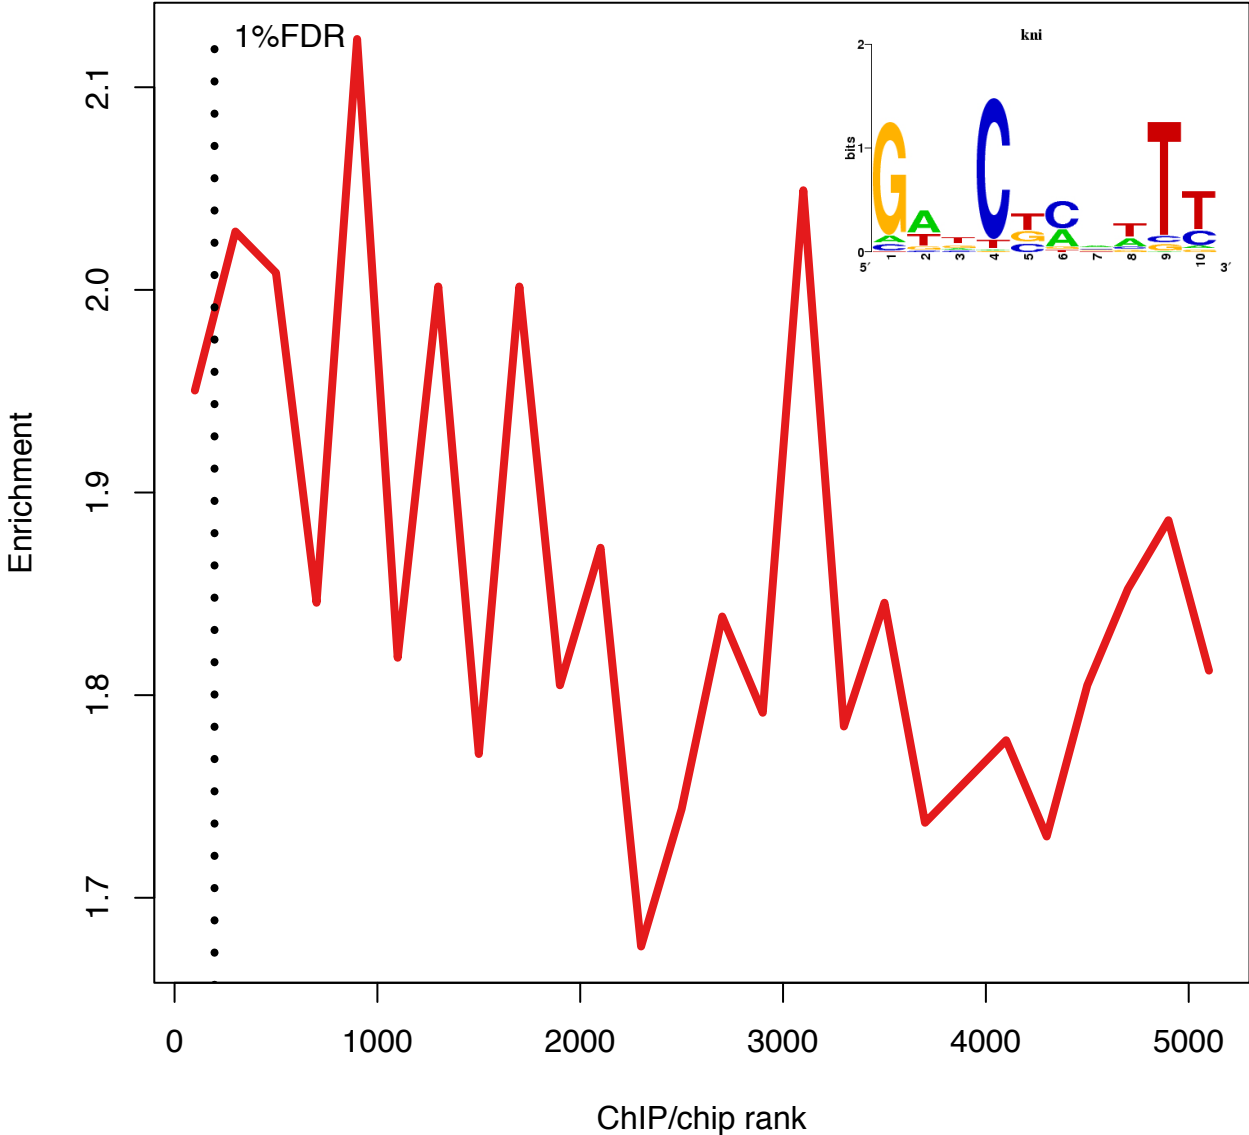

### KR 2 PWM enrichment down ranks

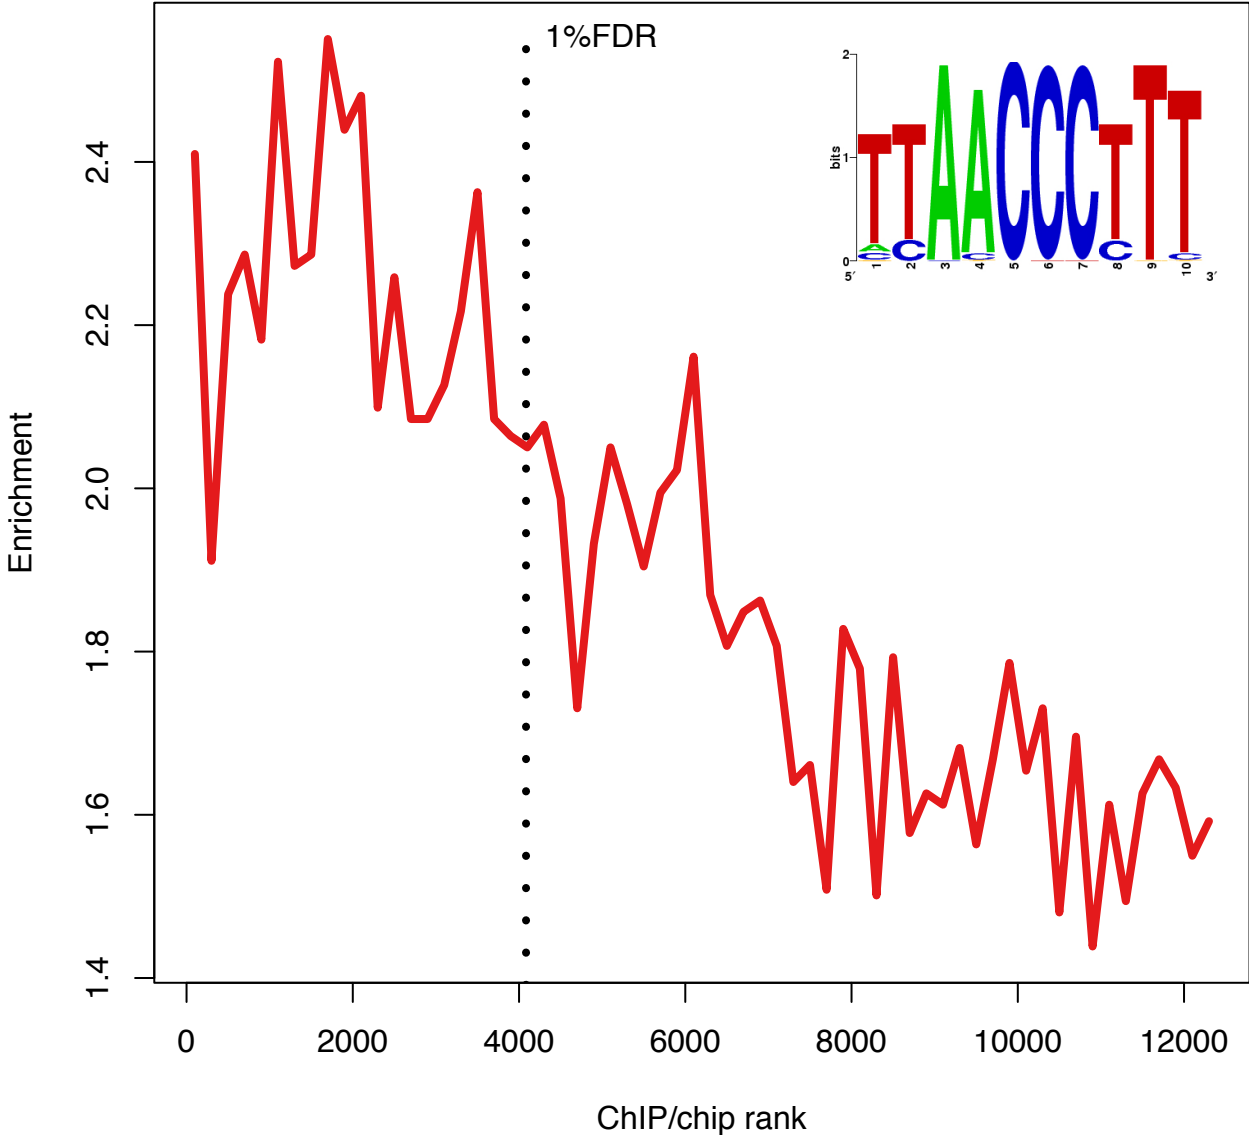

### MAD 2 PWM enrichment down ranks

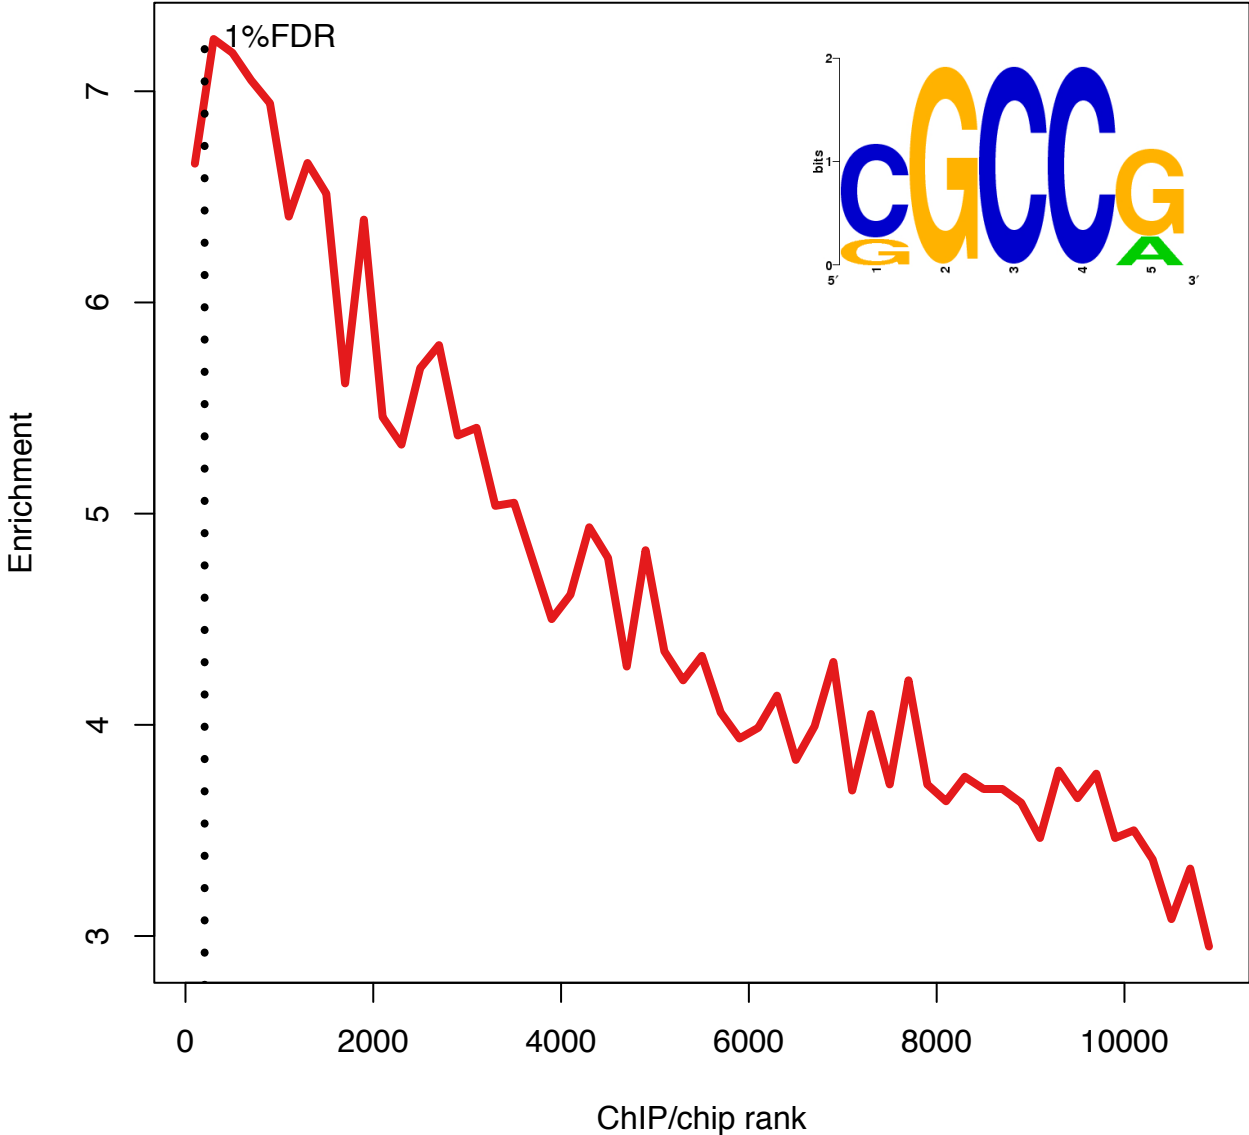

### MED 2 PWM enrichment down ranks

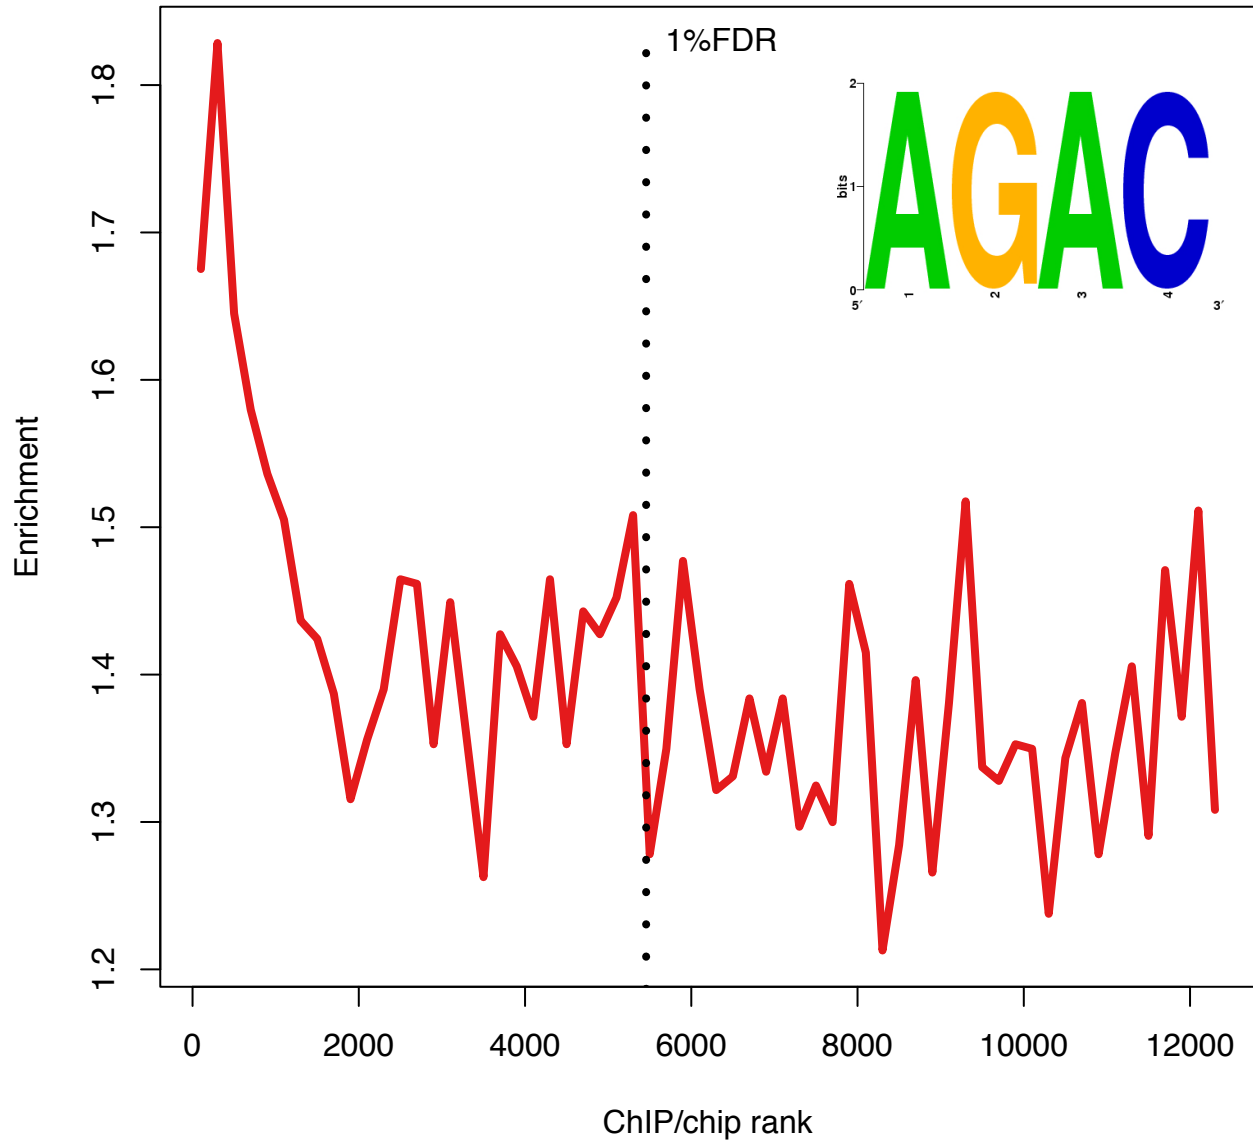

### PRD 1 PWM enrichment down ranks

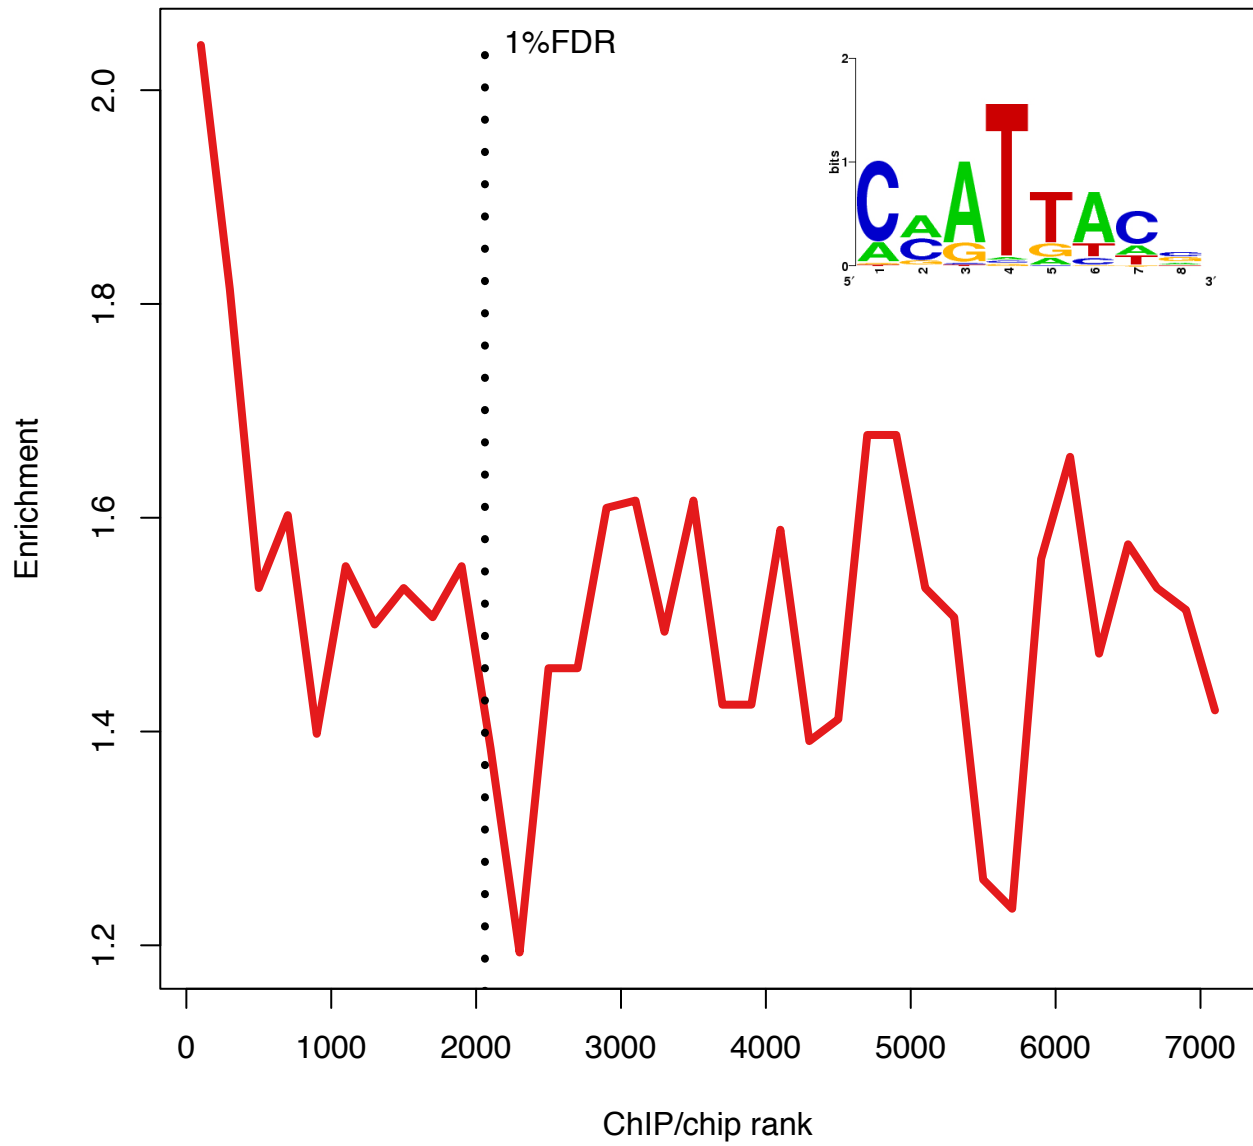

### RUN 1 PWM enrichment down ranks

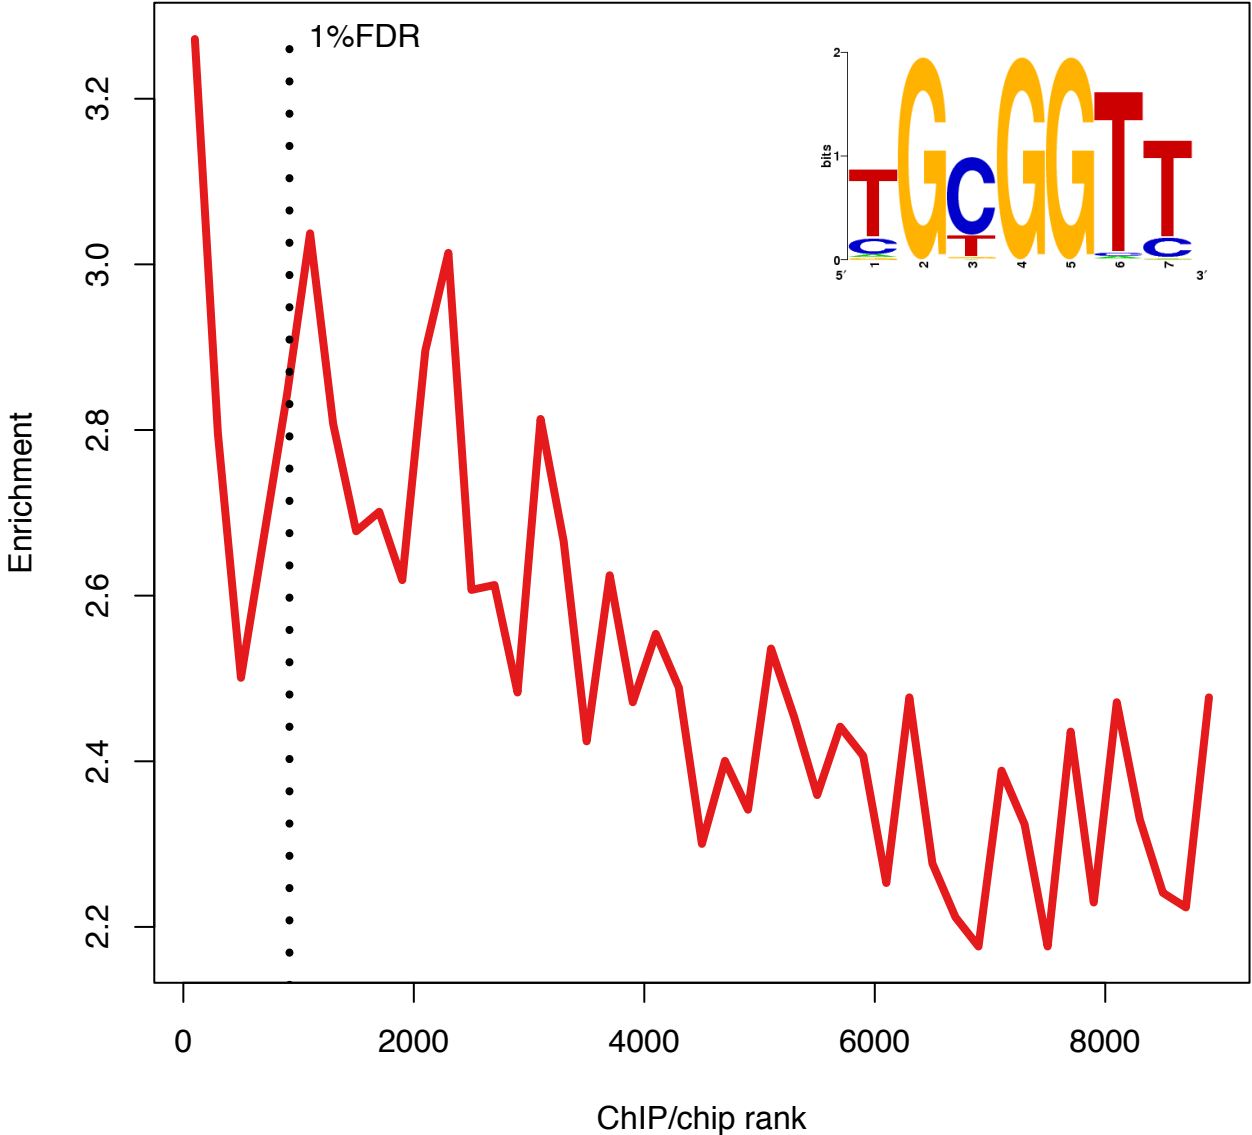



### SLP1 1 PWM enrichment down ranks

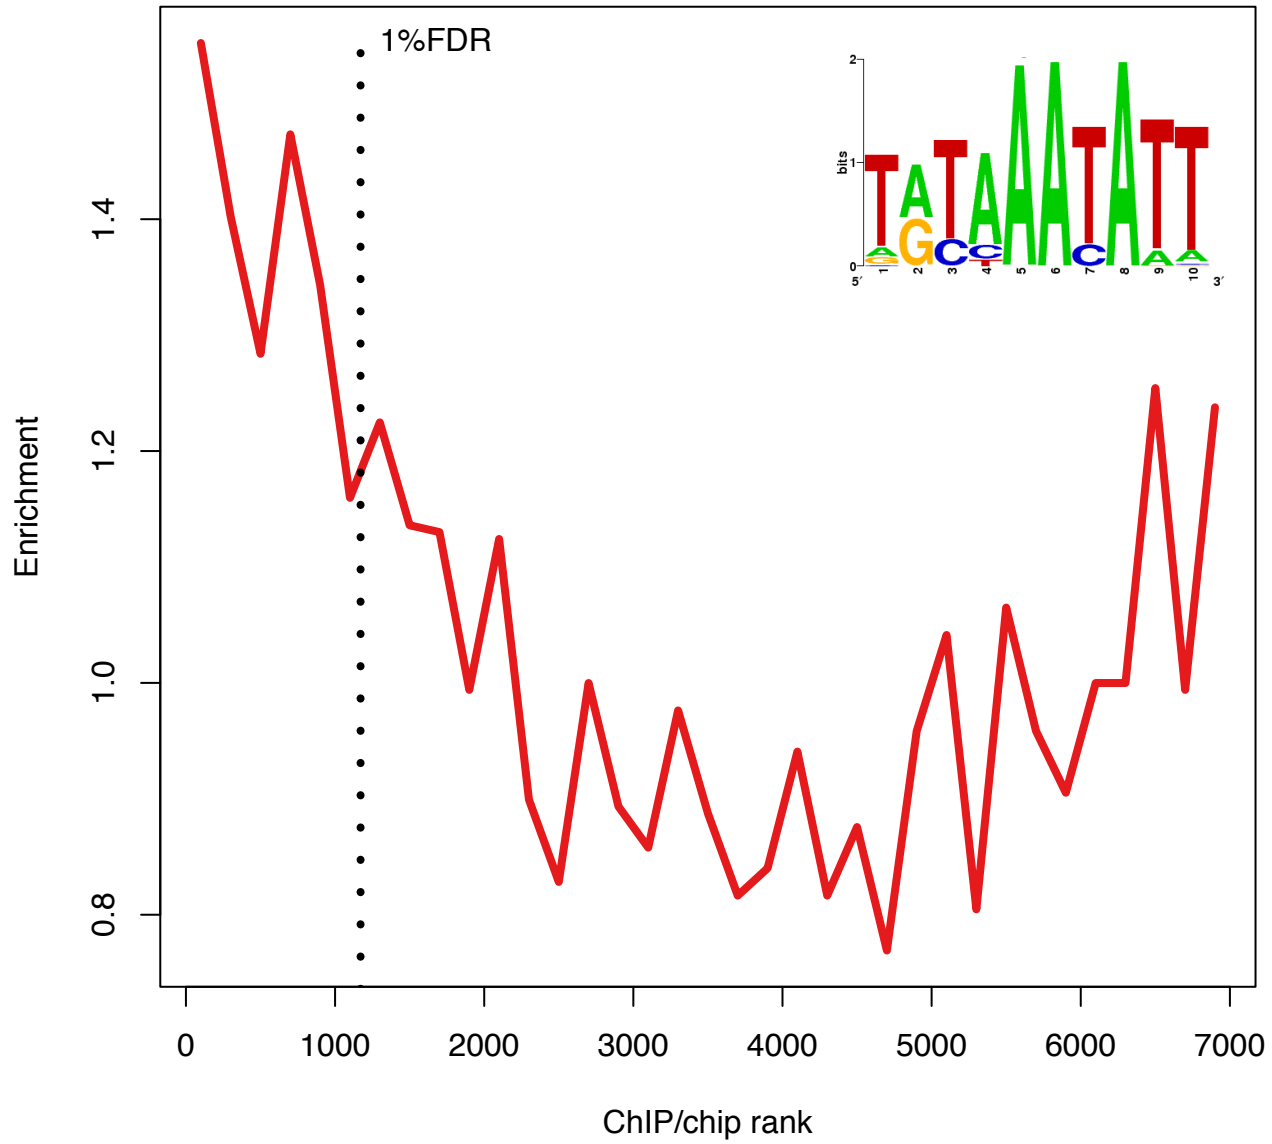

### SNA 2 PWM enrichment down ranks

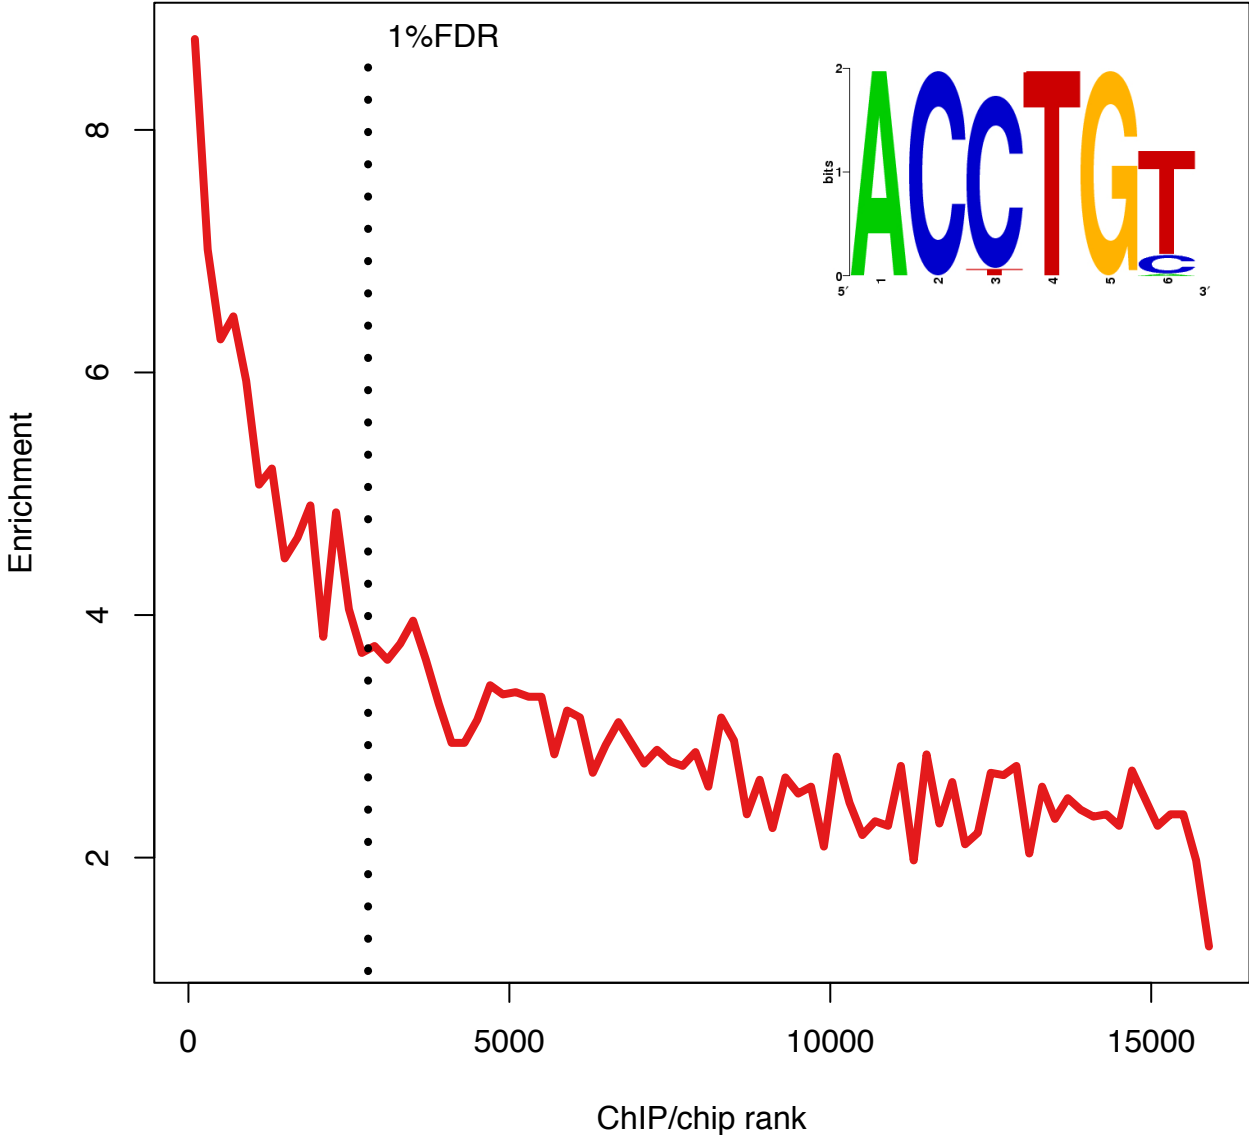

### TLL 1 PWM enrichment down ranks

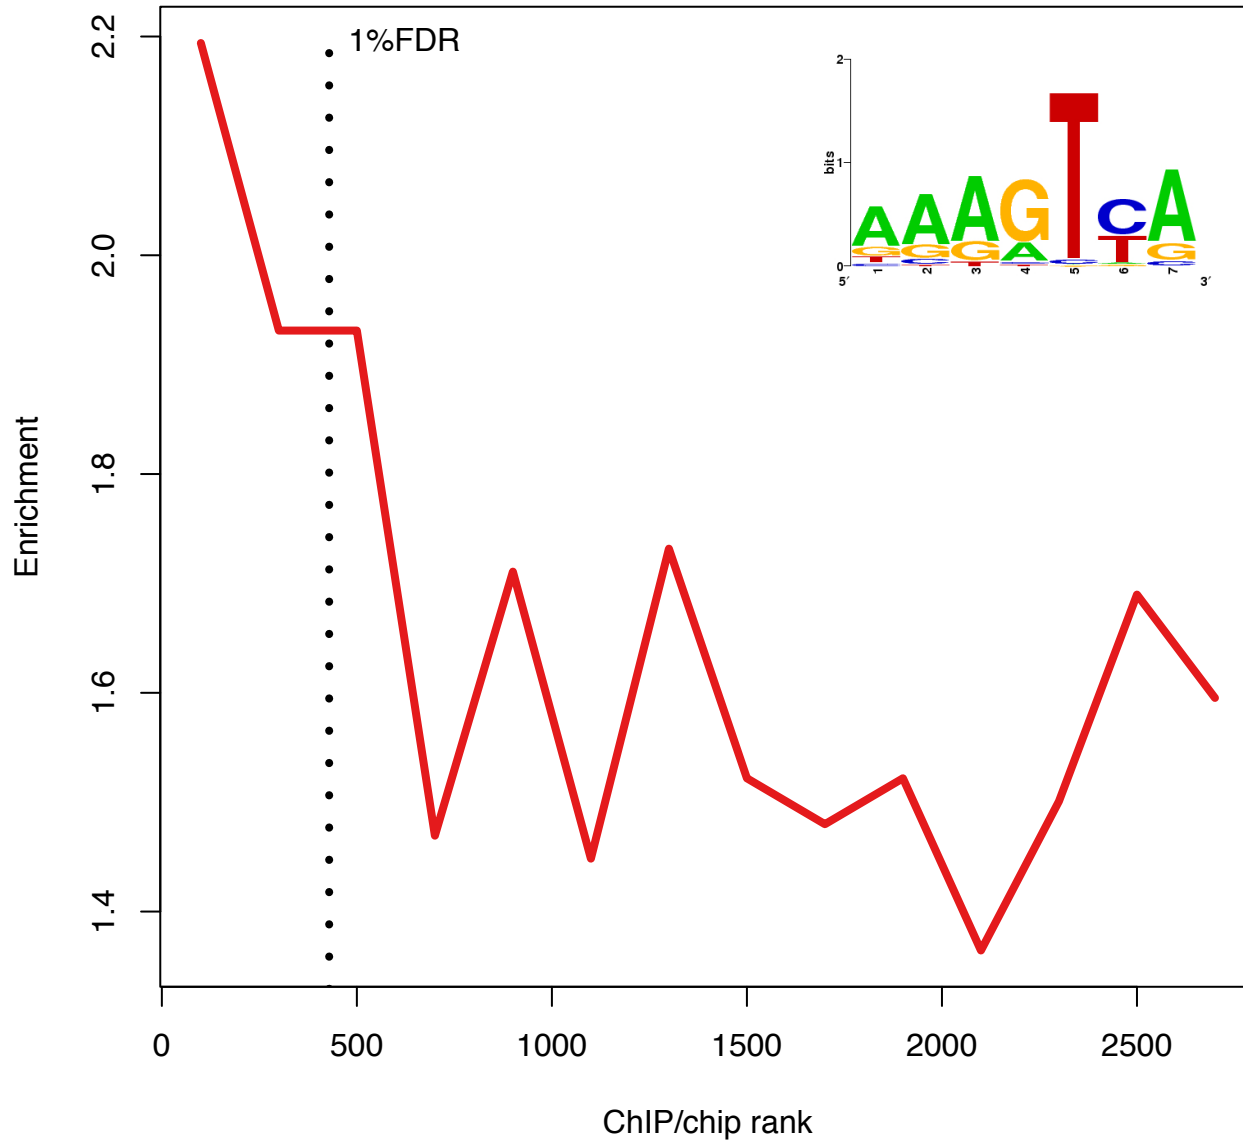

### TWI 2 PWM enrichment down ranks

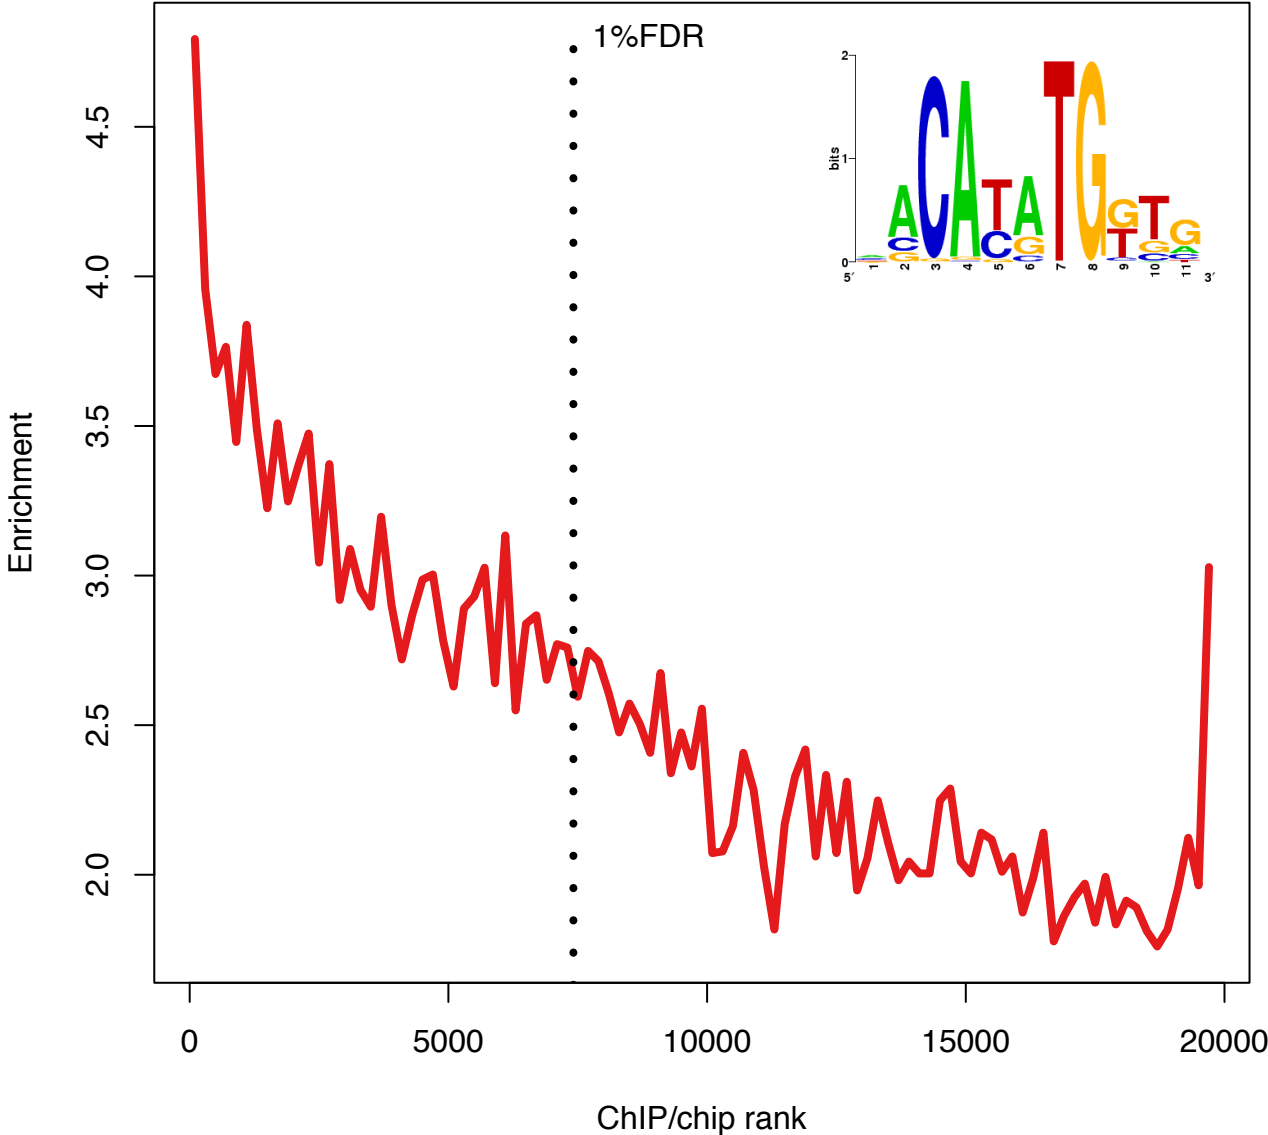

Supplement: 13059_2009_2230_MOESM3_ESM.pdf [file 13059_2009_2230_MOESM3_ESM.pdf]
