# Supplementary material for: Developmental roles of 21 Drosophila transcription factors are determined by quantitative differences in binding to an overlapping set of thousands of genomic regions
Source: Springer Nature journal article supplement (doi:10.1186/gb-2009-10-7-r80), 2009-07-23

### BCD 2 GO term enrichment

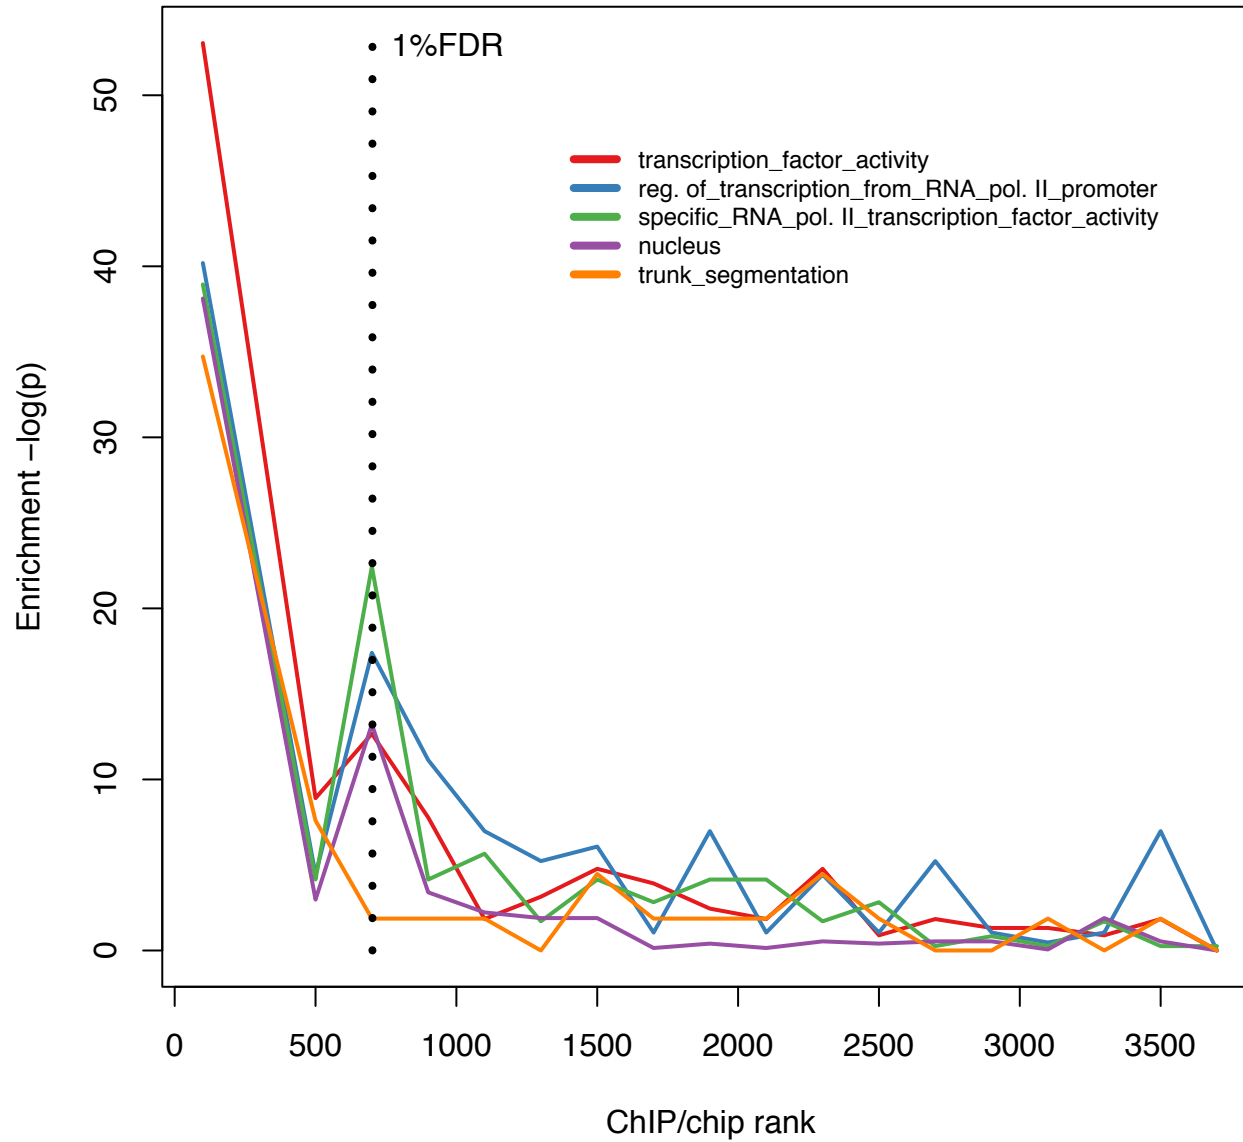

### CAD 1 GO term enrichment

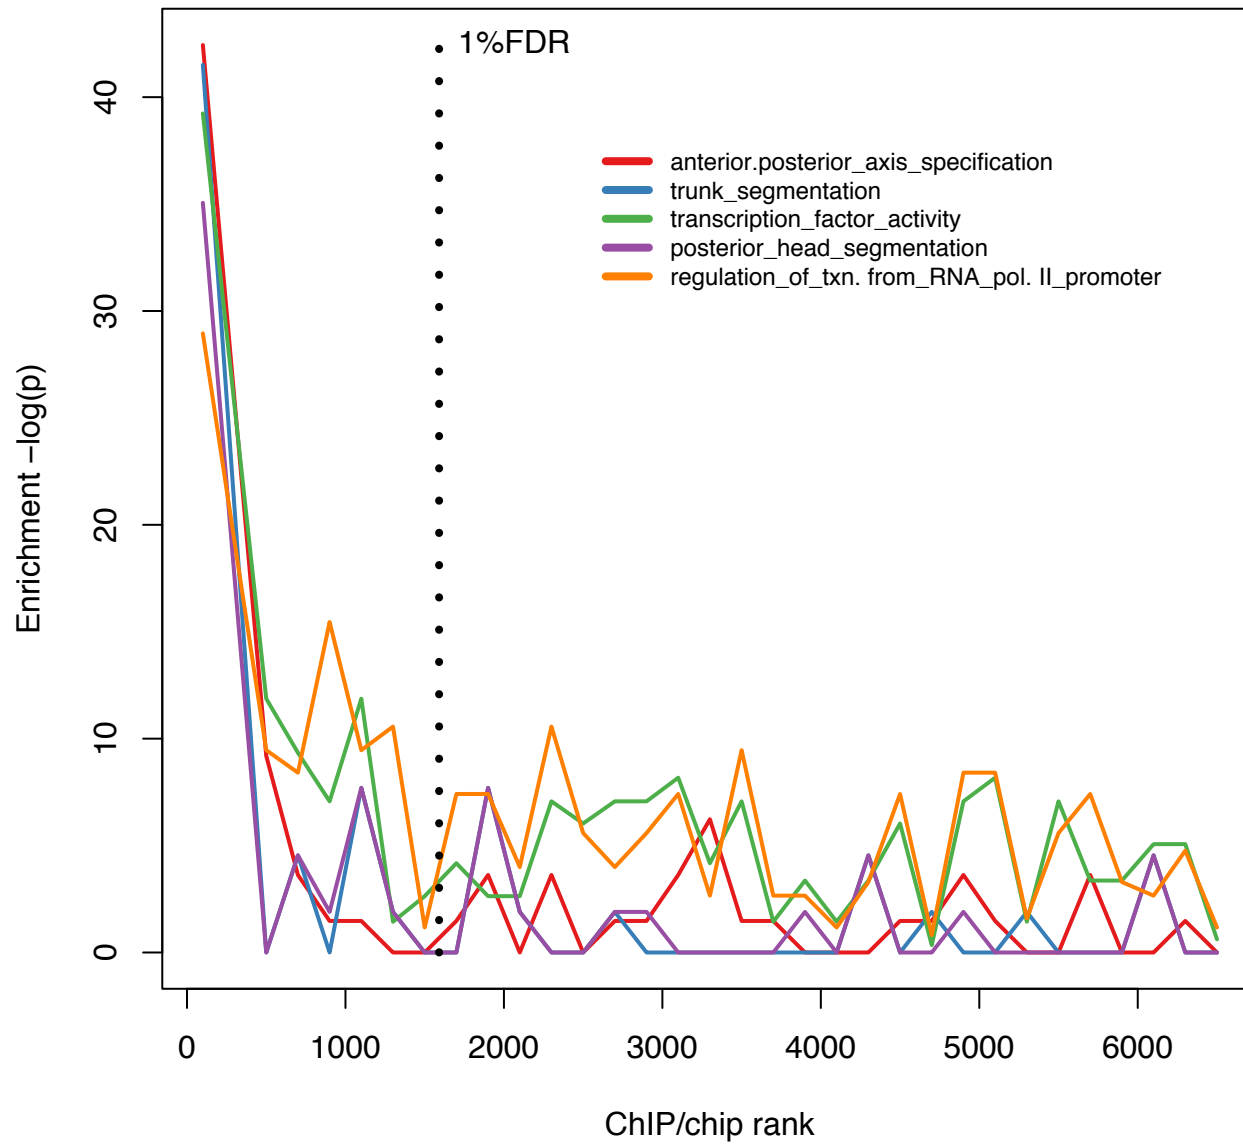

### D 1 GO term enrichment

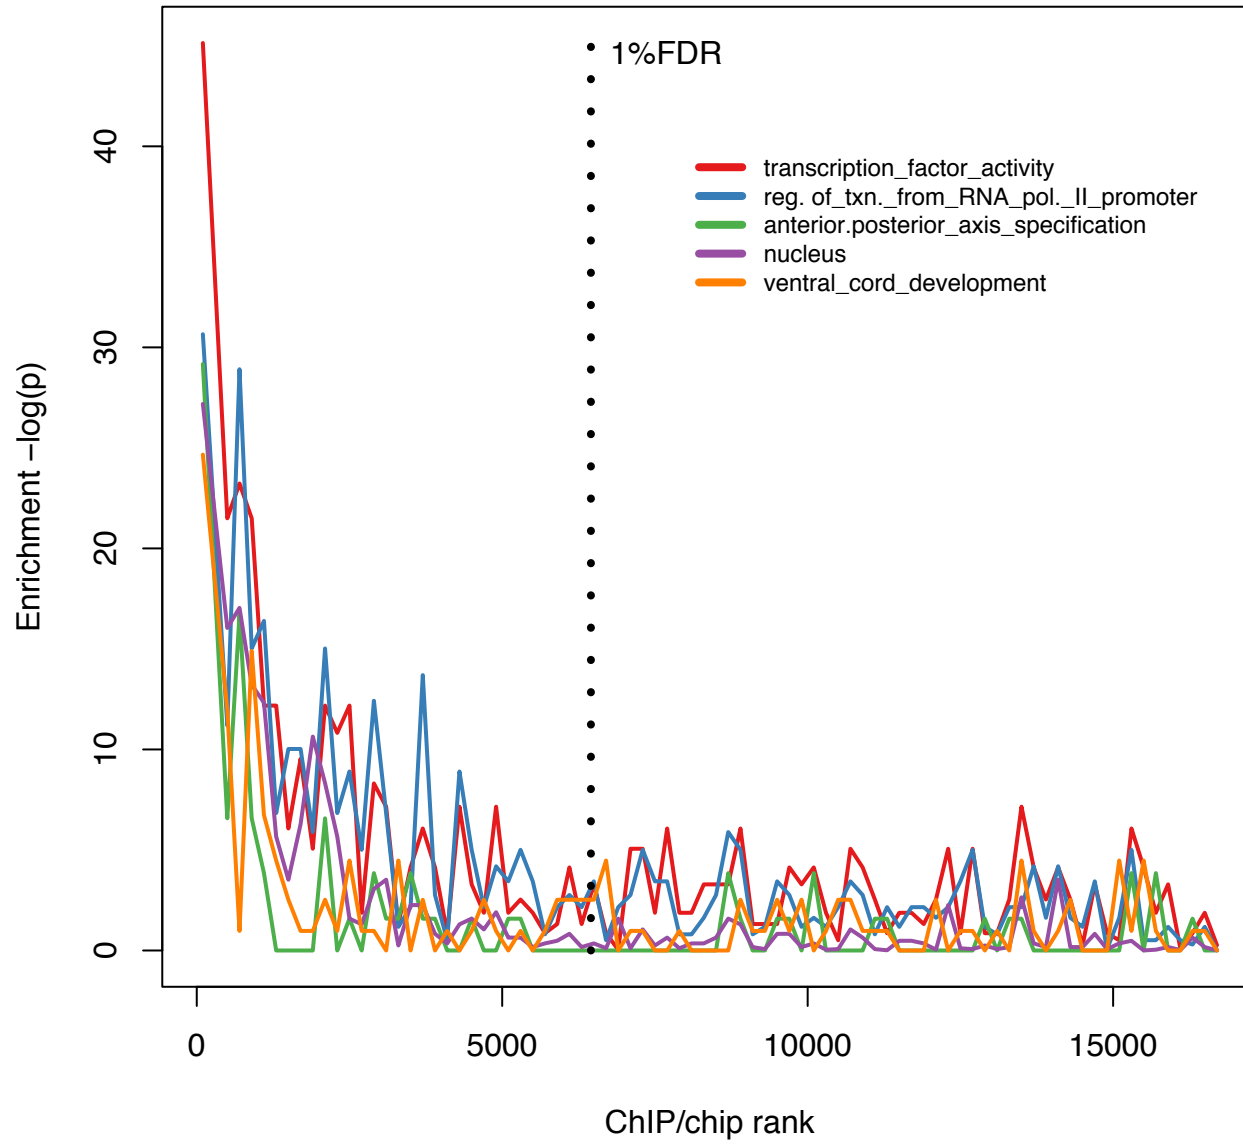

## DA 2 GO term enrichment

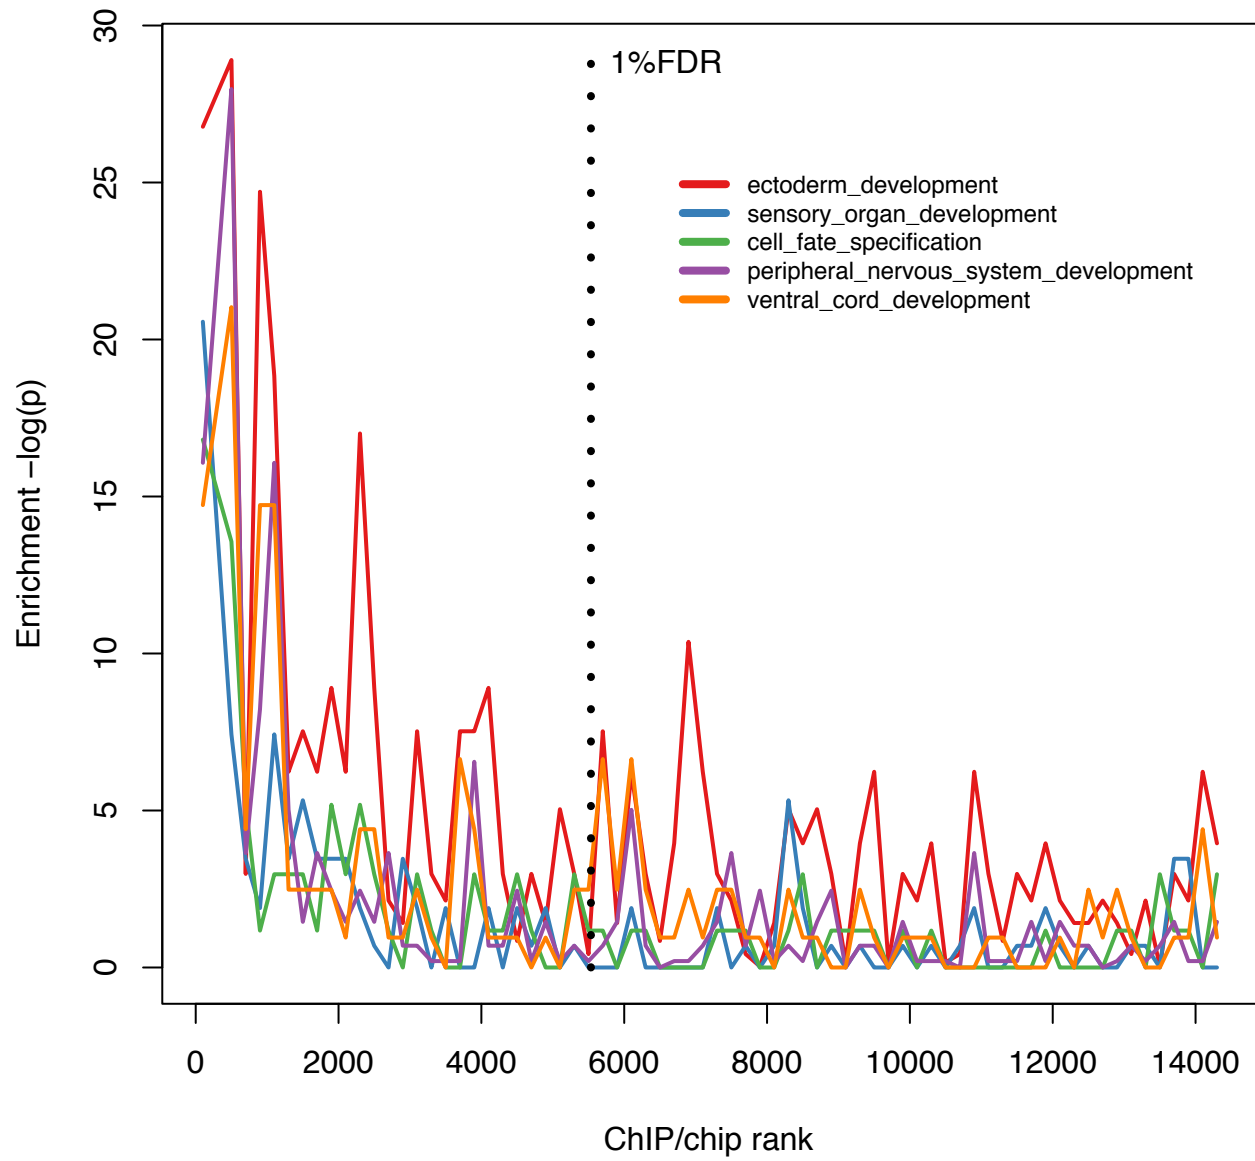

### DL 3 GO term enrichment

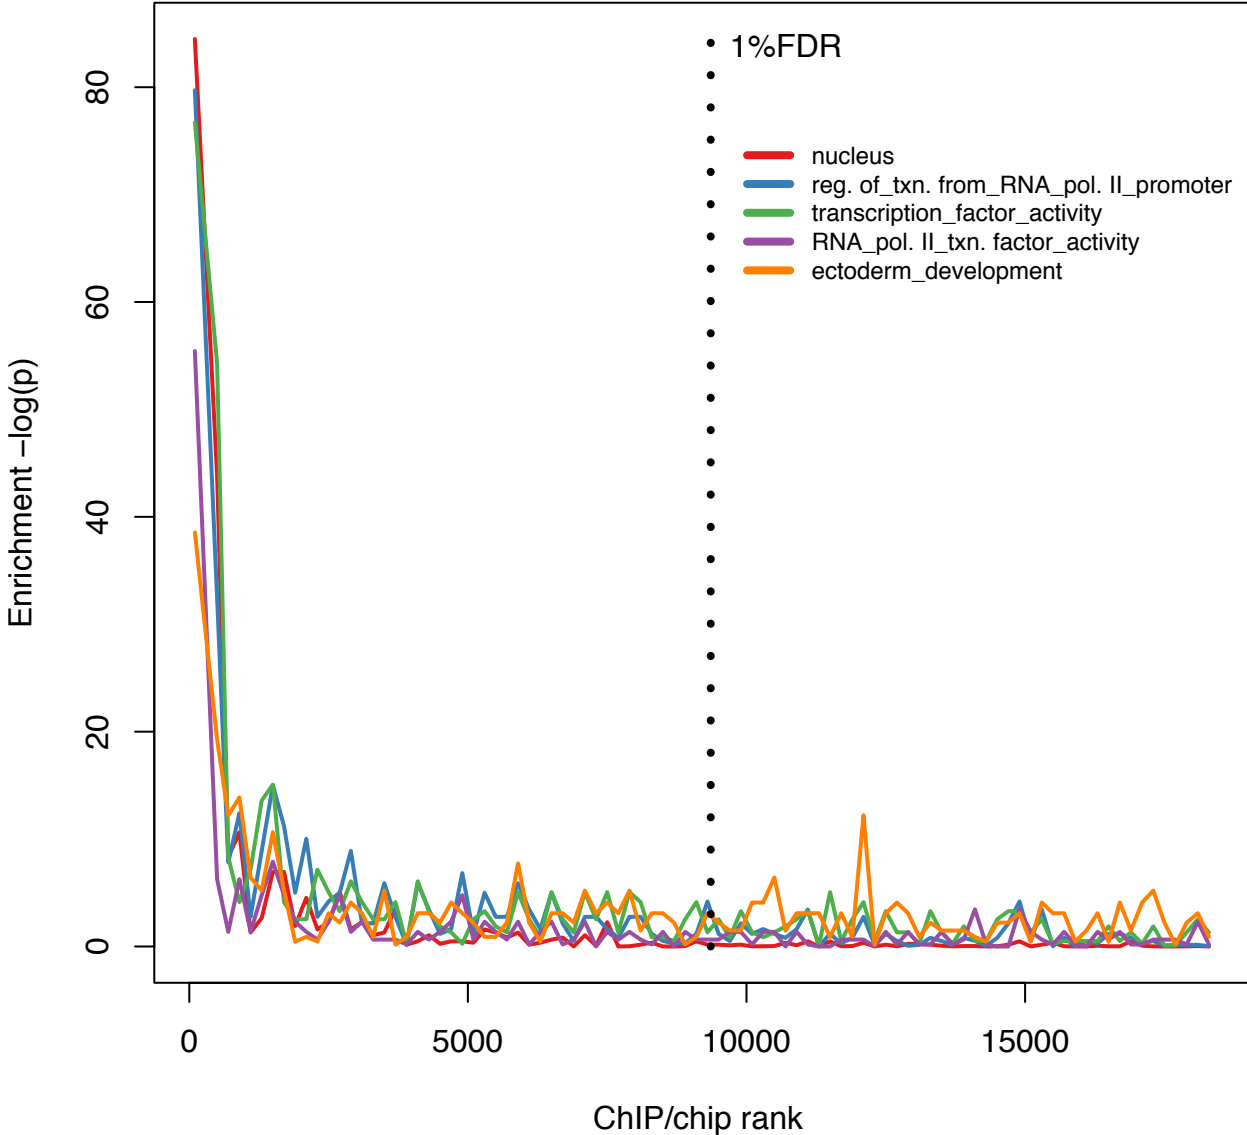

### FTZ 3 GO term enrichment

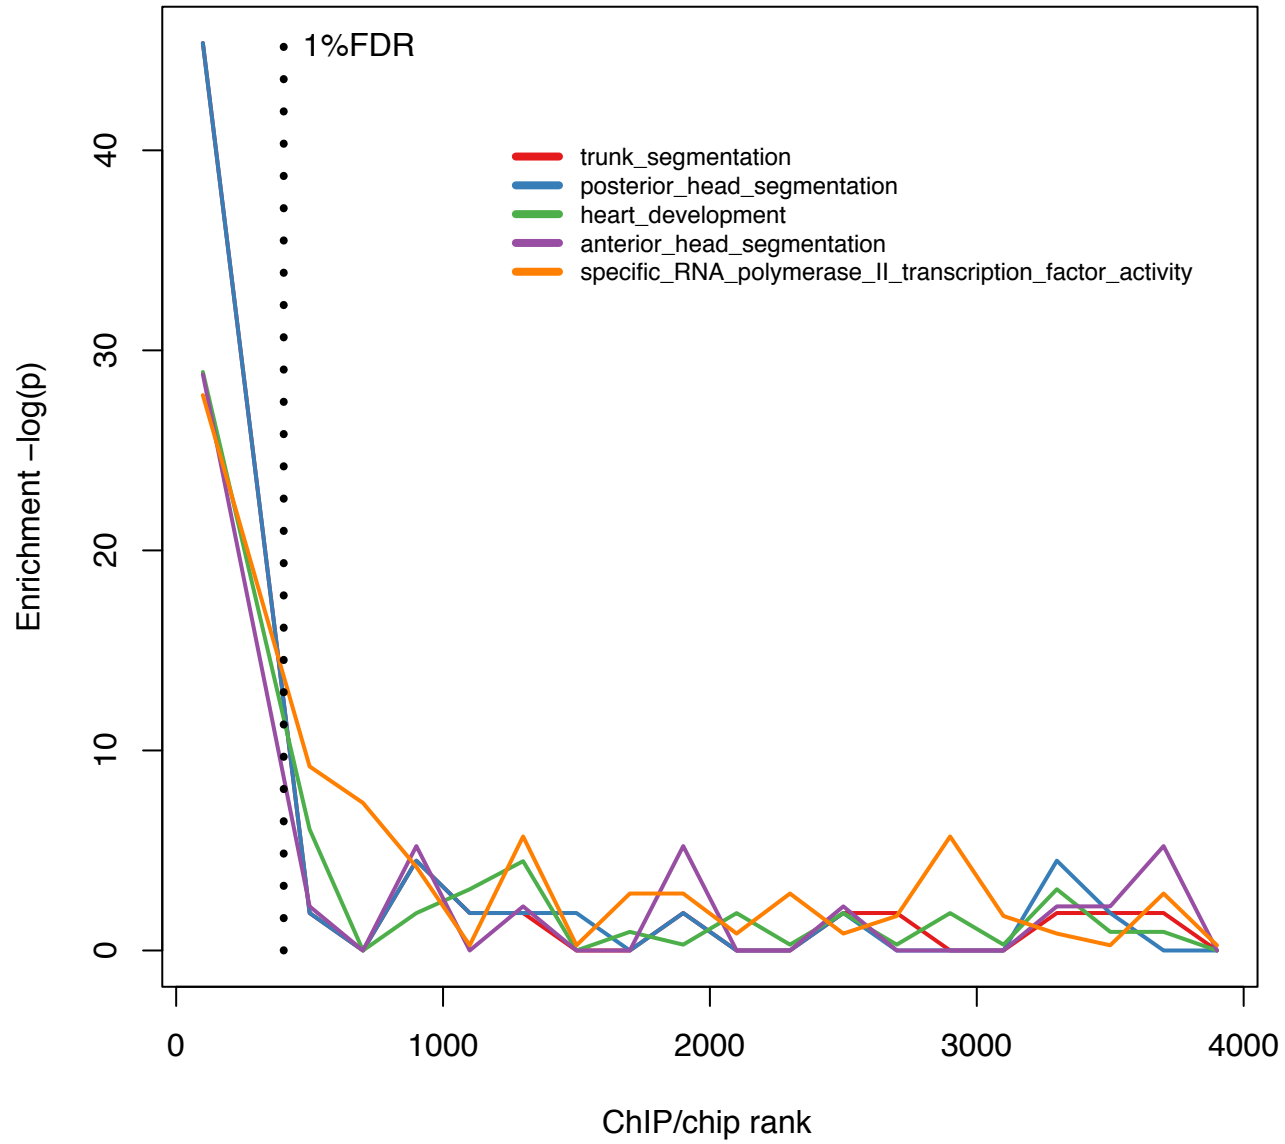

## GT 2 GO term enrichment

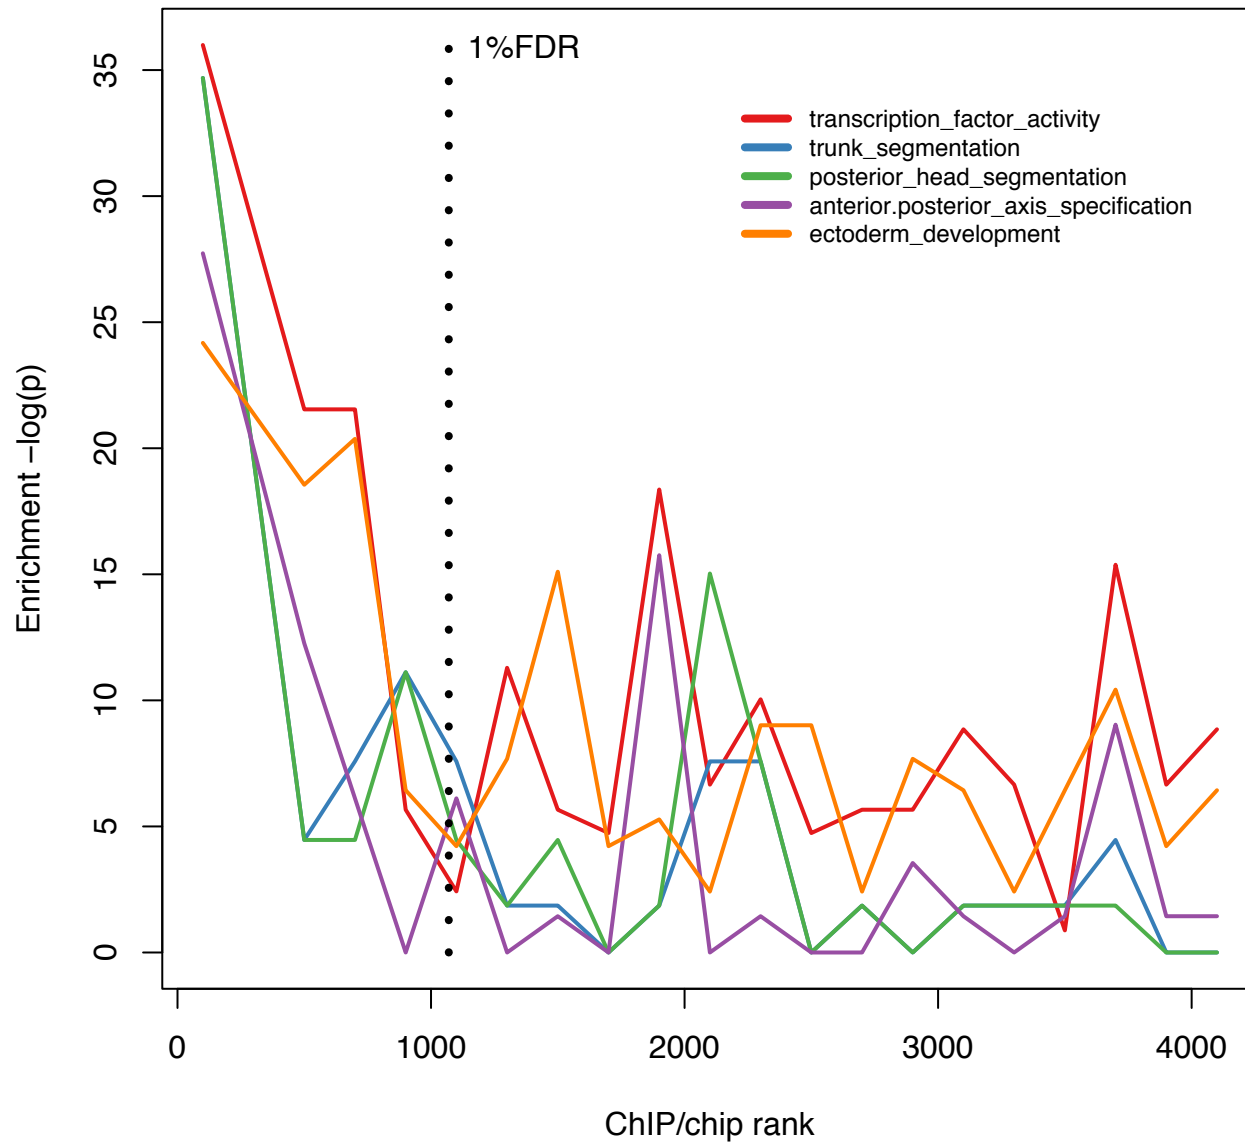

## HB 1 GO term enrichment

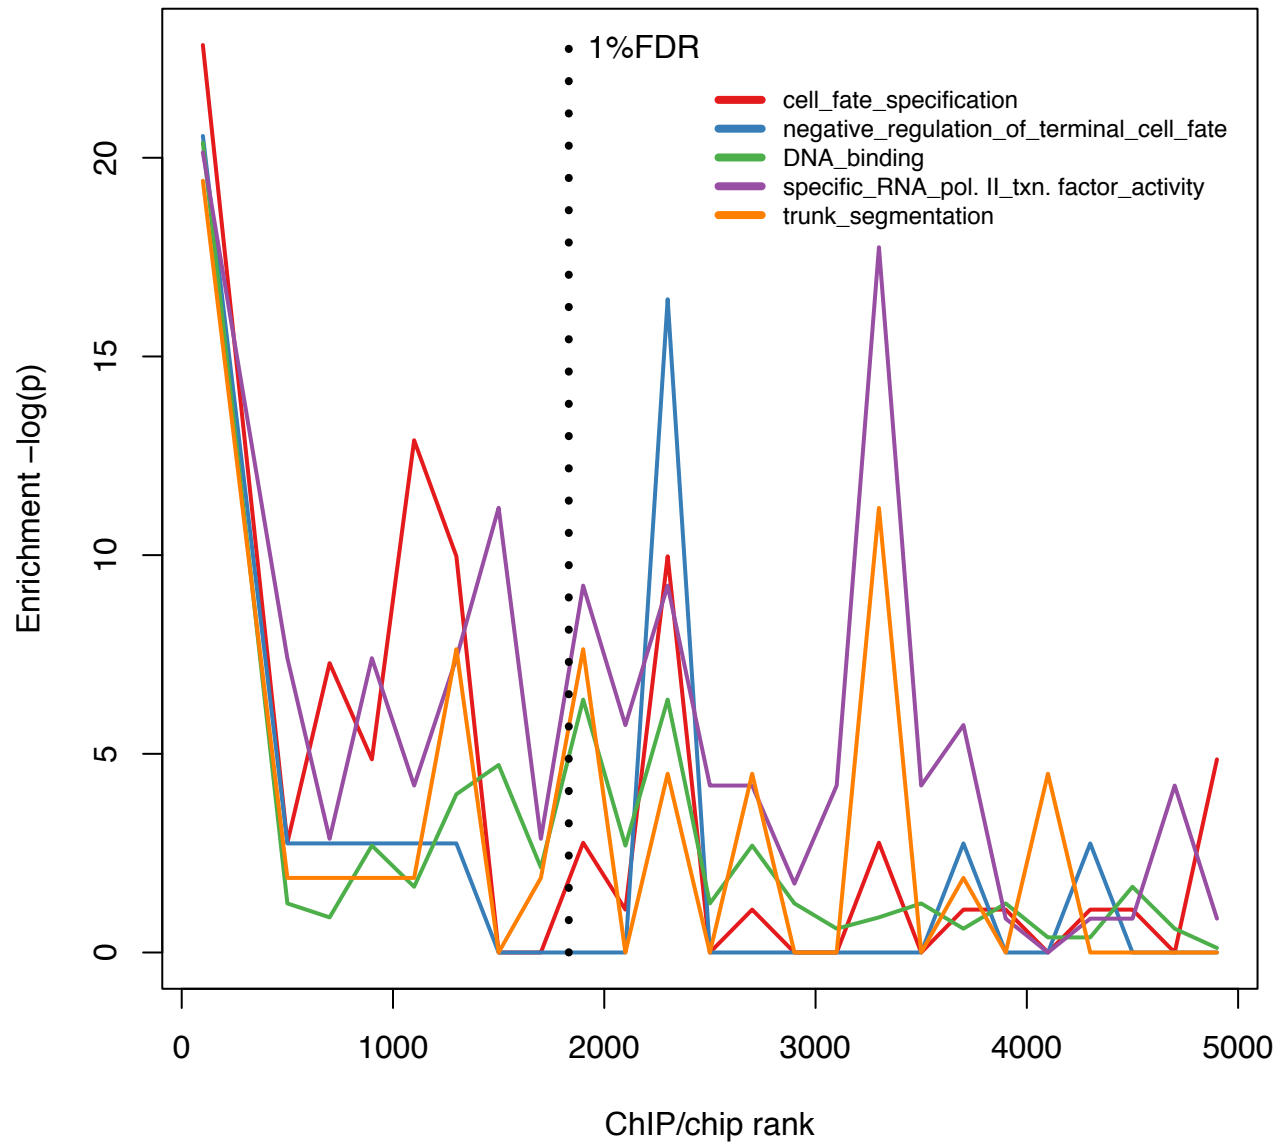



### HKB 1 GO term enrichment

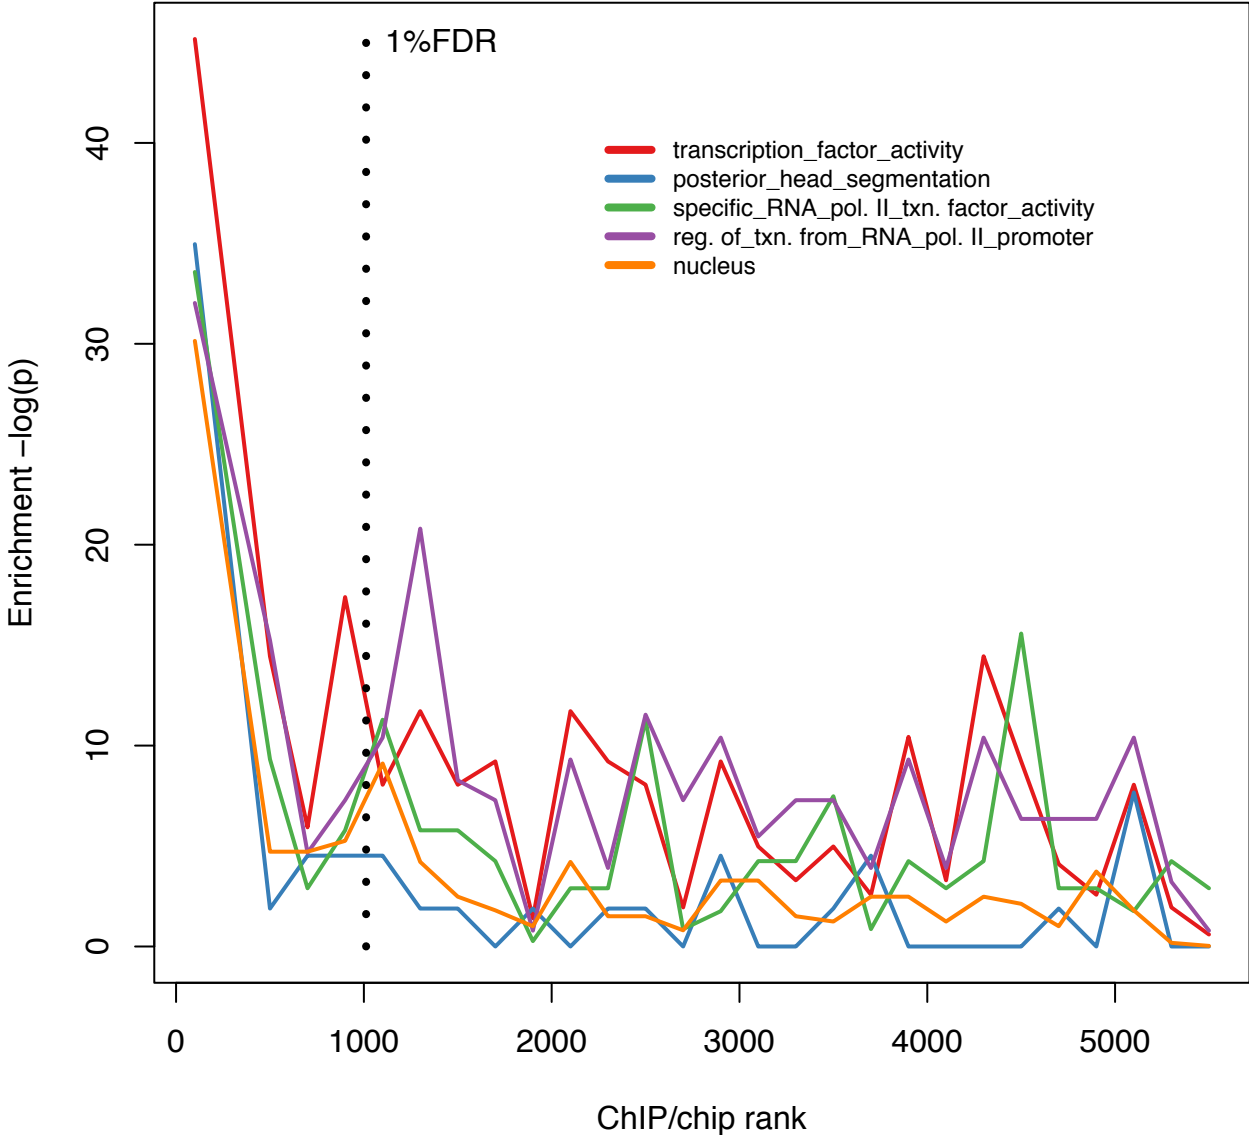

## HRY 2 GO term enrichment

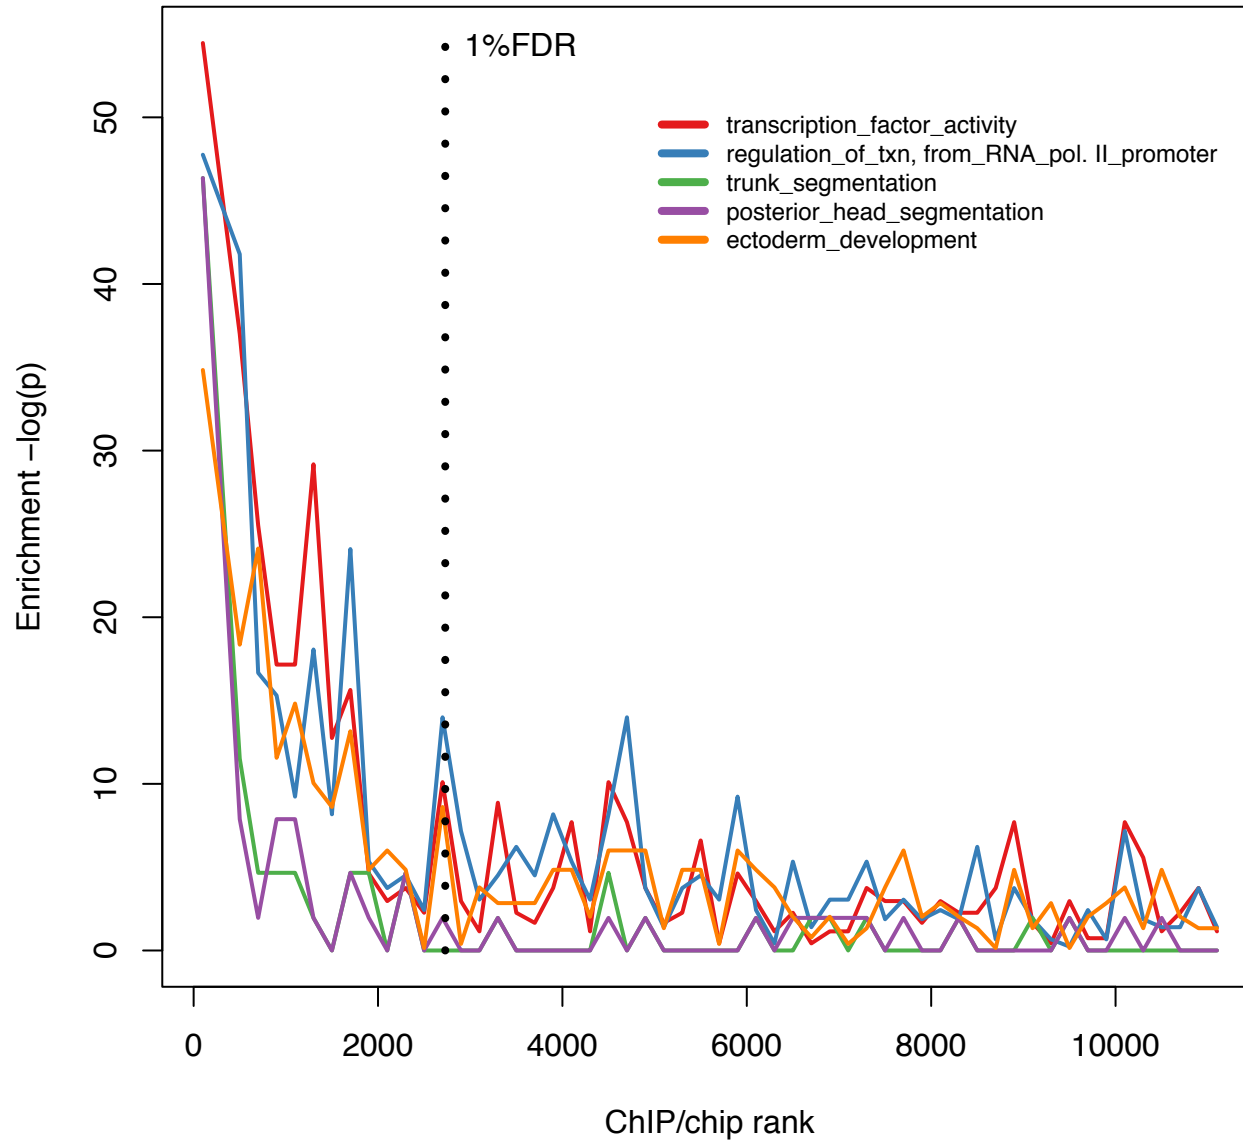

## KNI 2 GO term enrichment

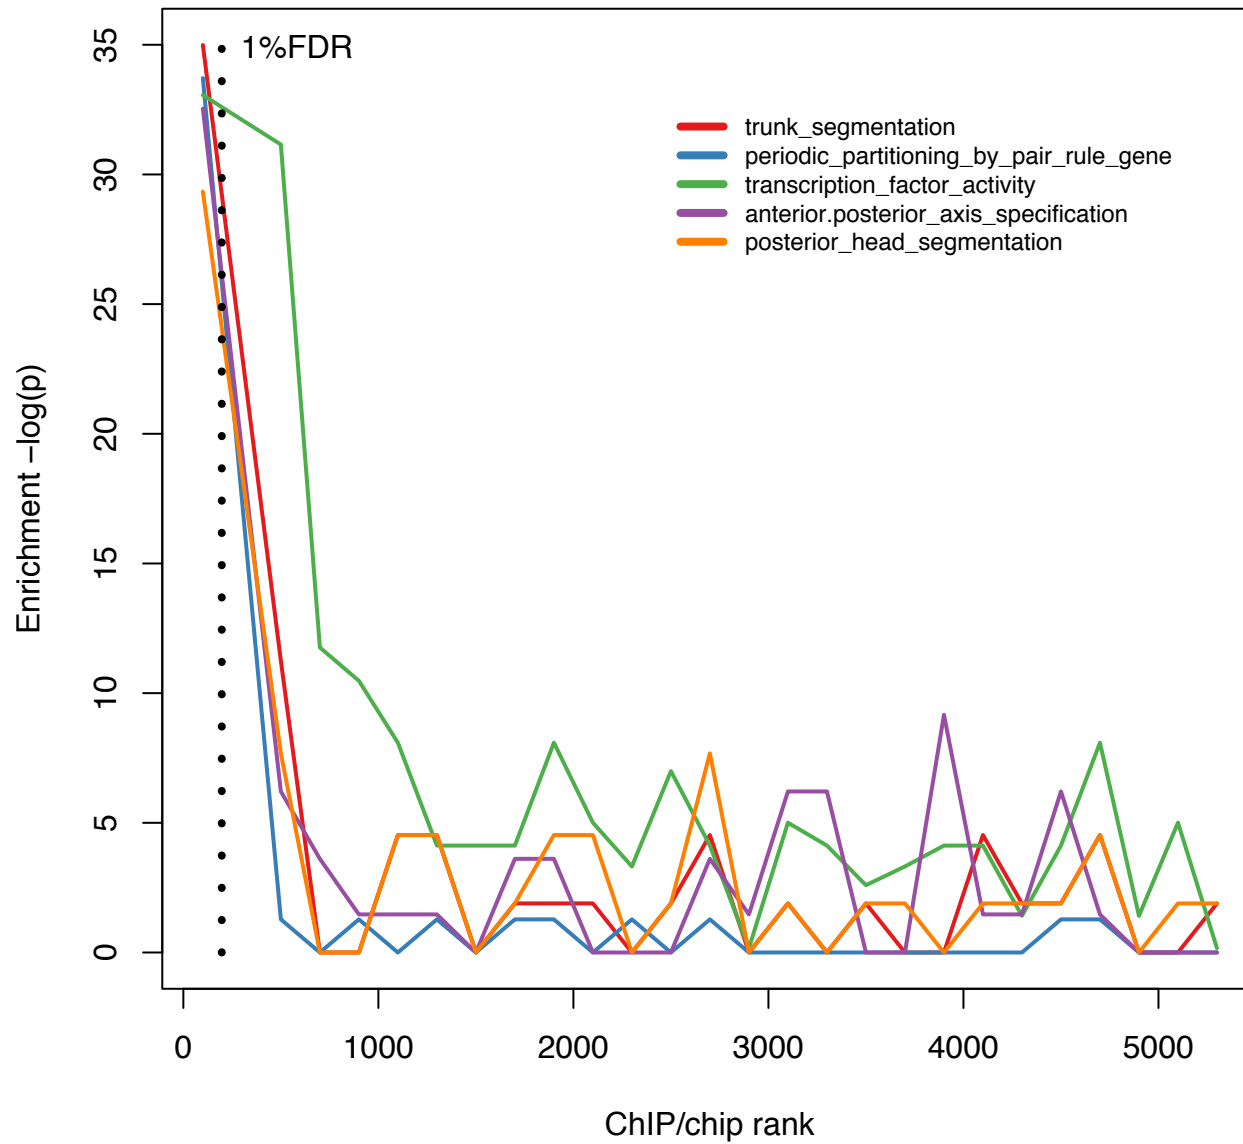

## KR 2 GO term enrichment

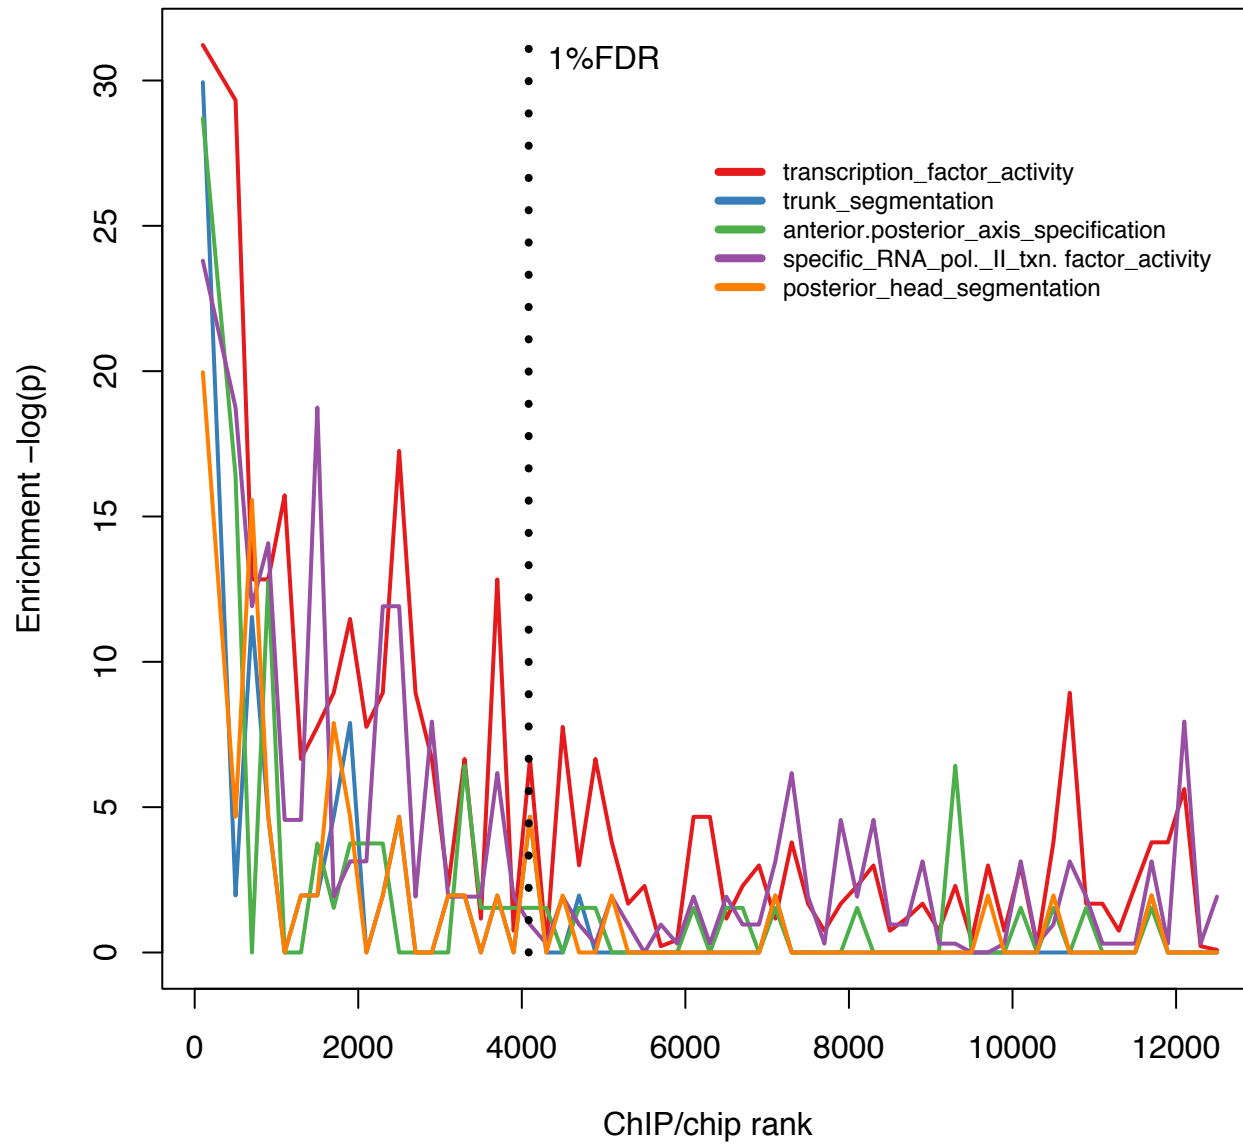

### MAD 2 GO term enrichment

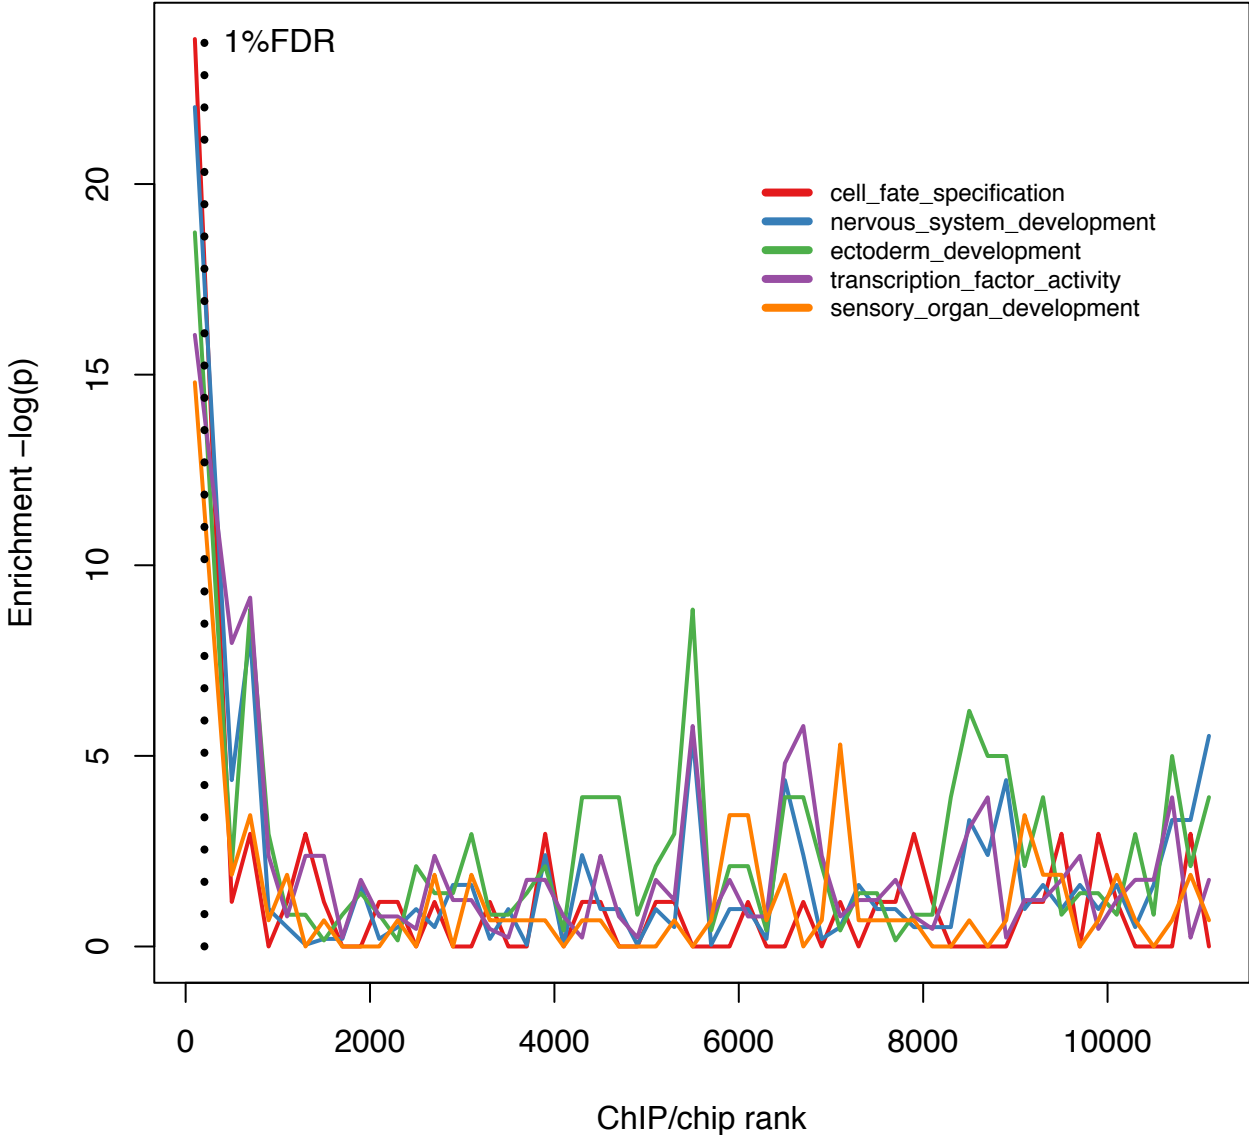

### MED 2 GO term enrichment

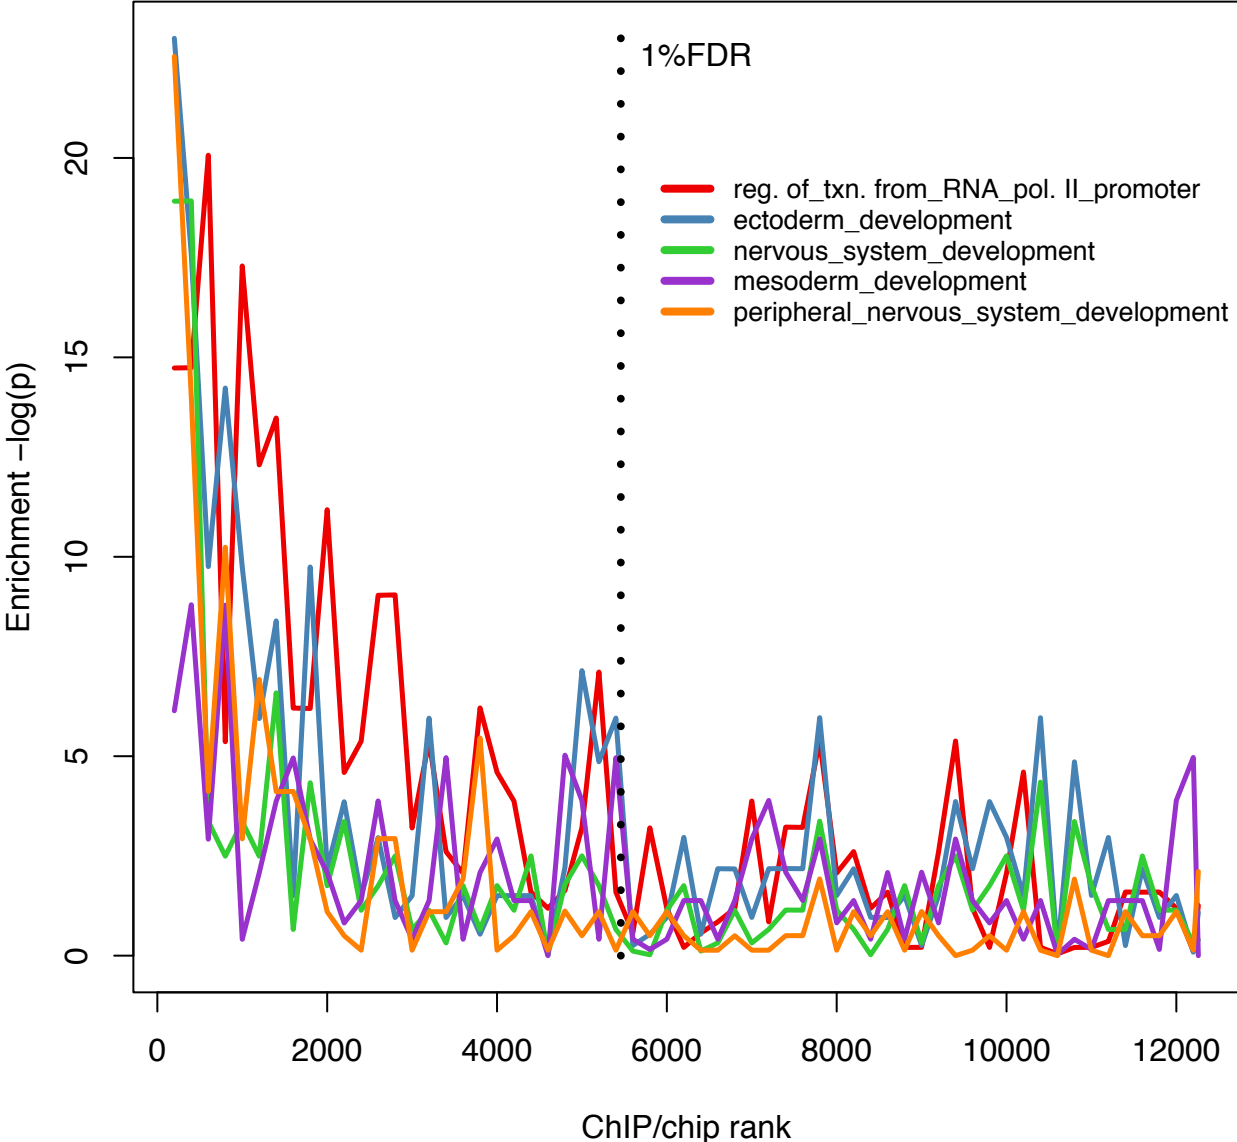

### PRD 1 GO term enrichment

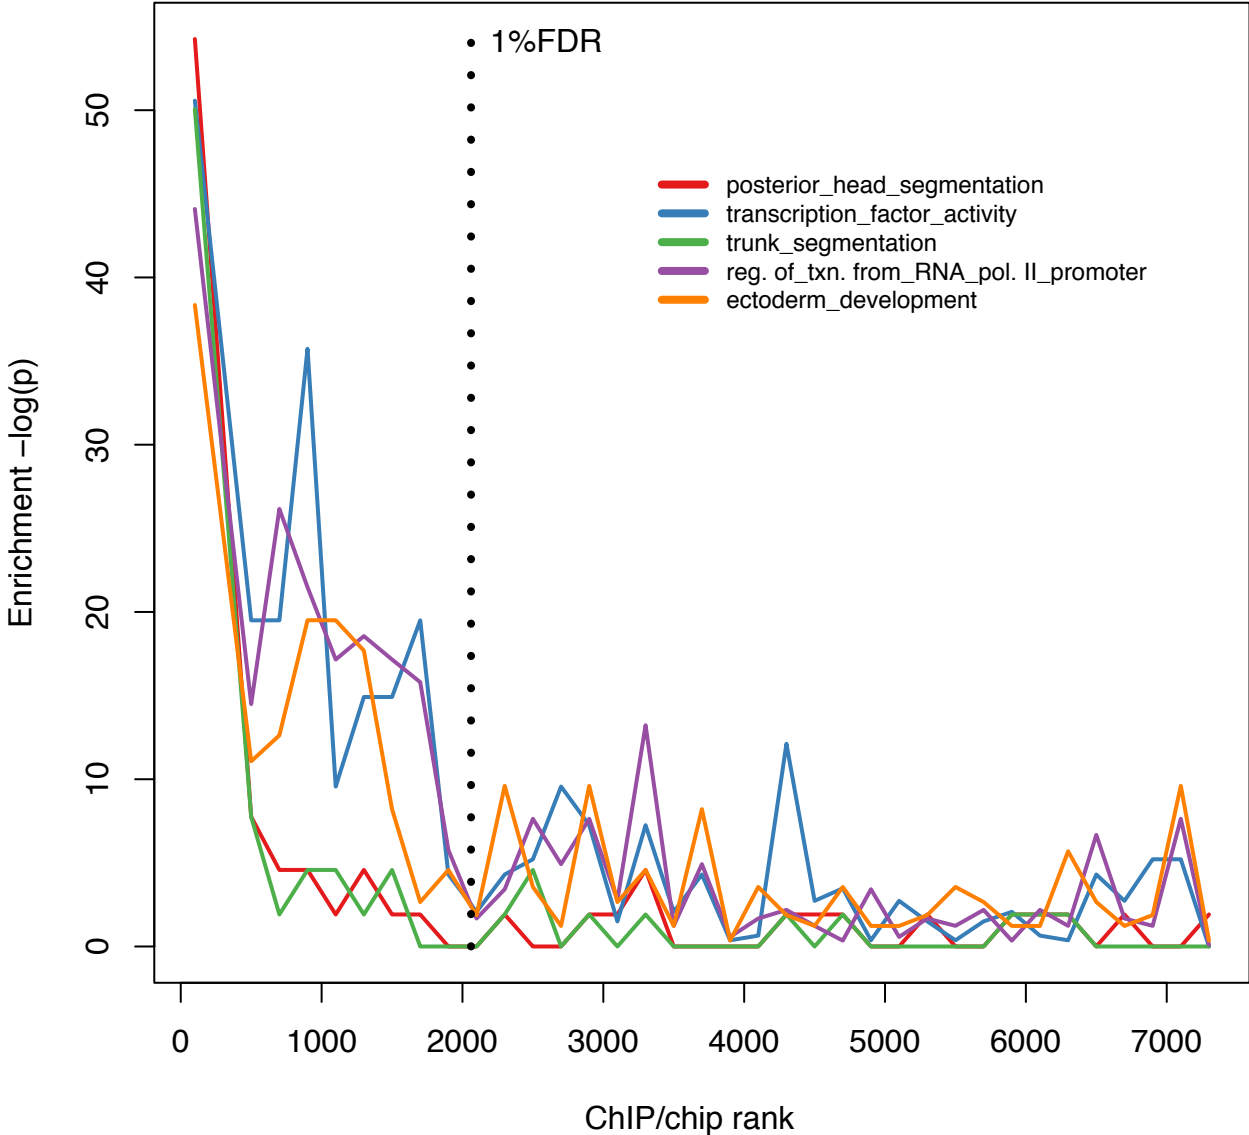

### RUN 1 GO term enrichment

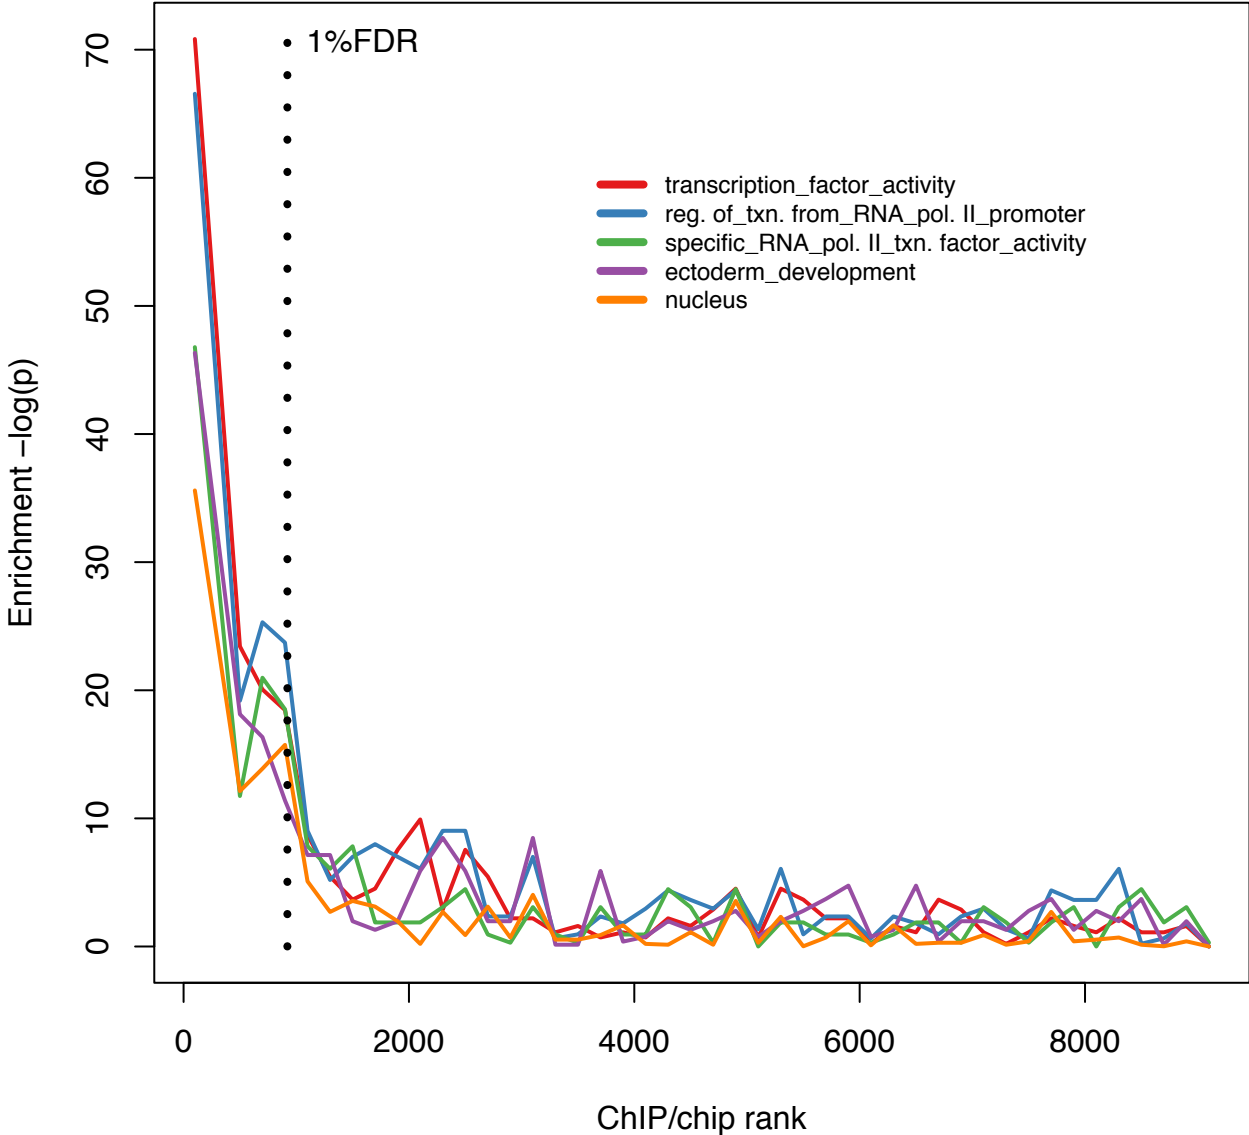



### SHN 2 GO term enrichment

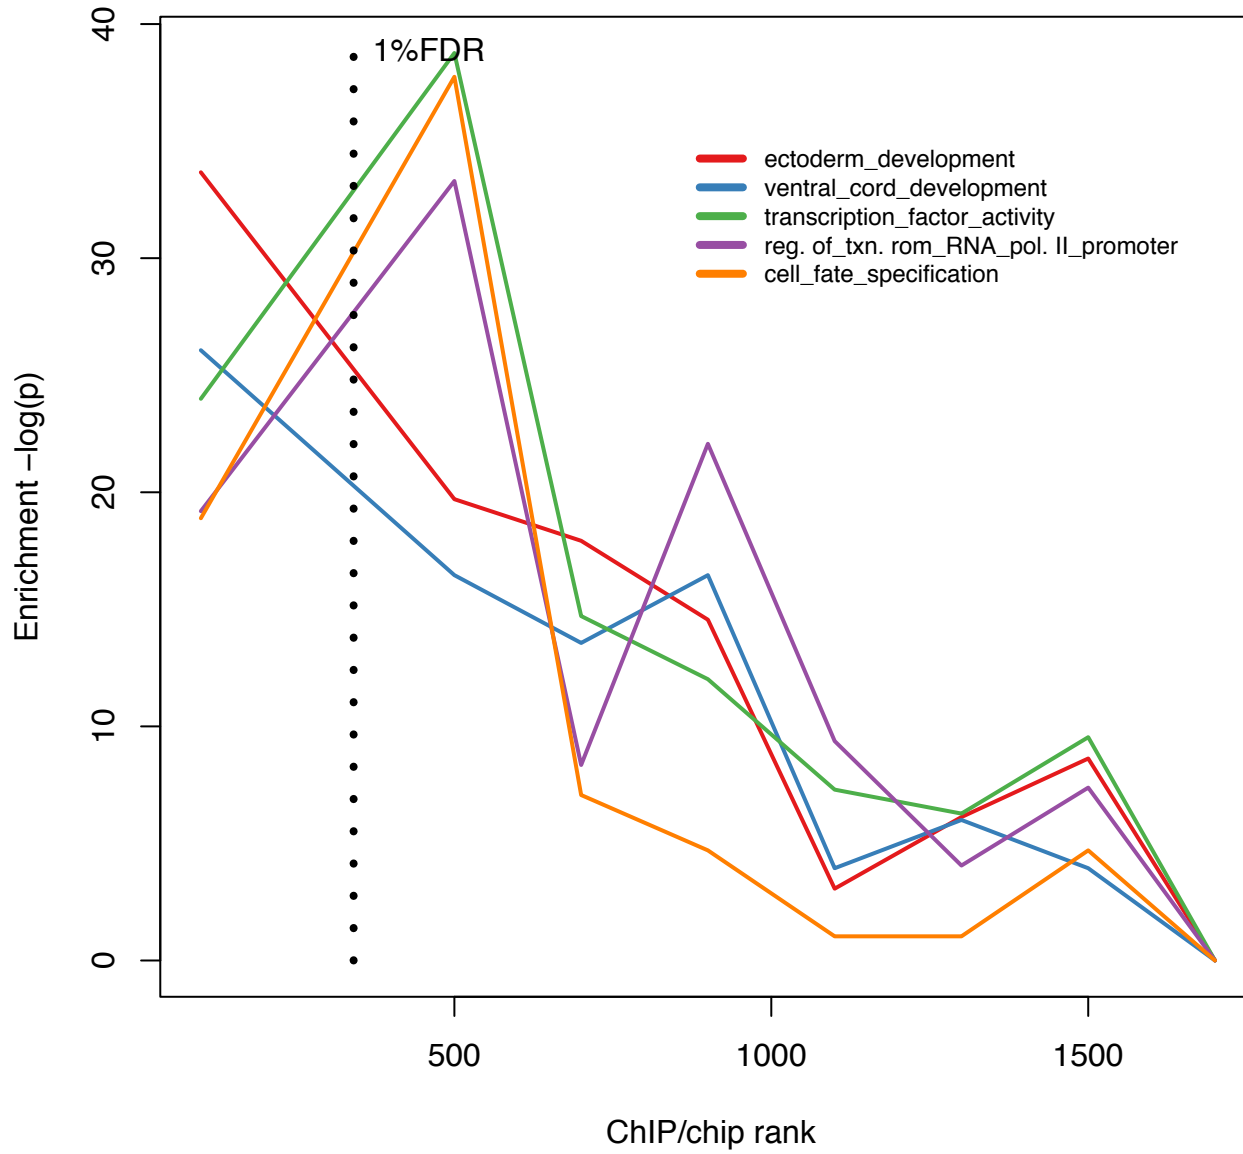

### SLP1 1 GO term enrichment

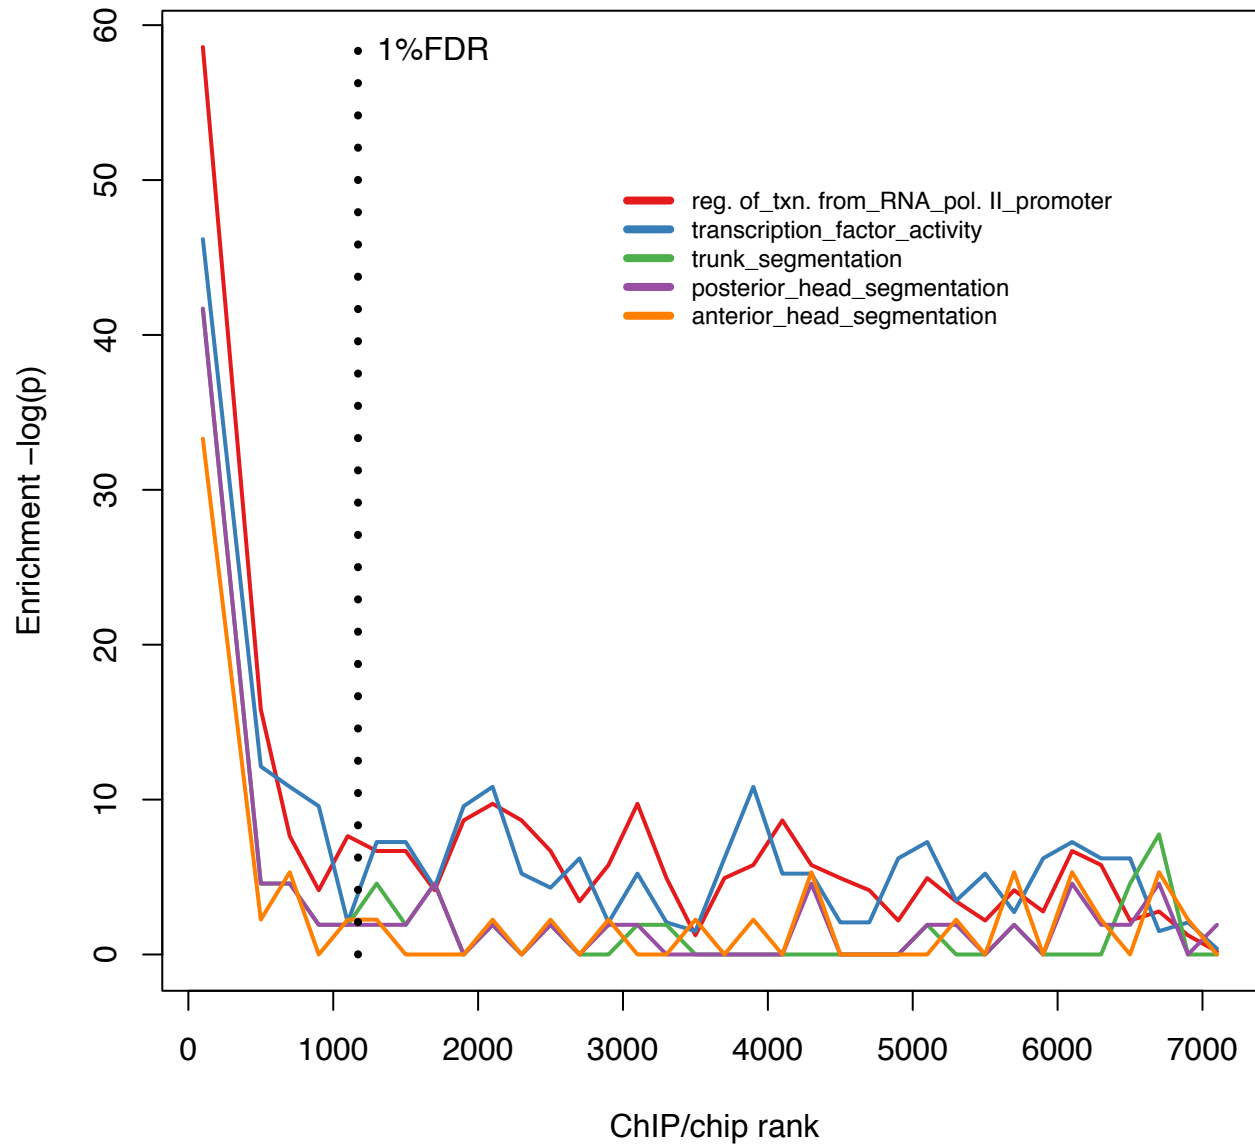

### SNA 2 GO term enrichment

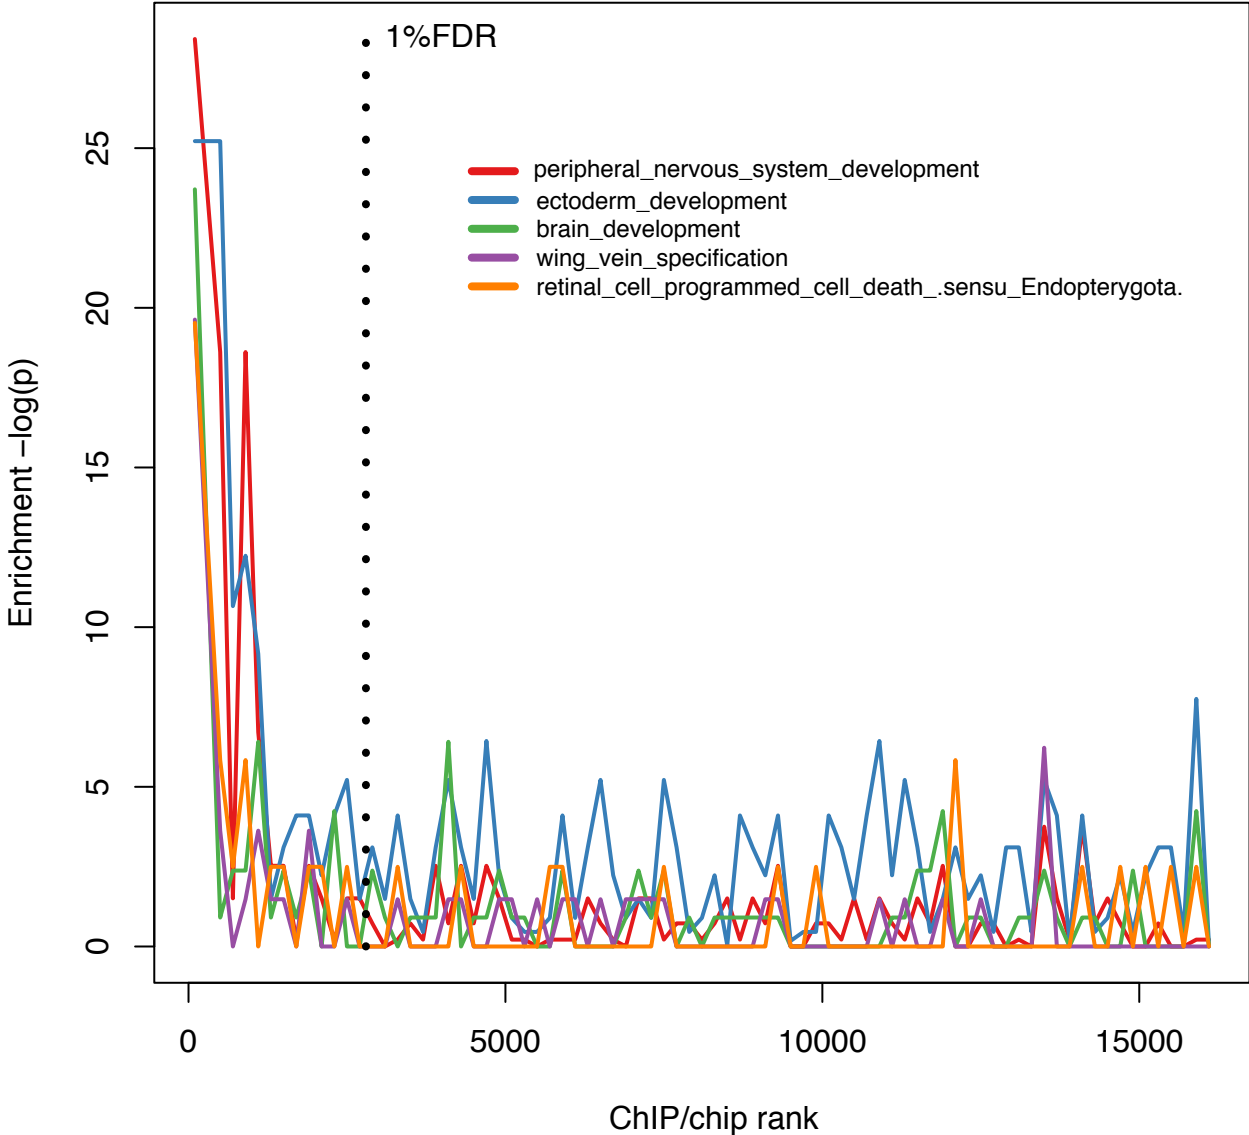

### TLL 1 GO term enrichment

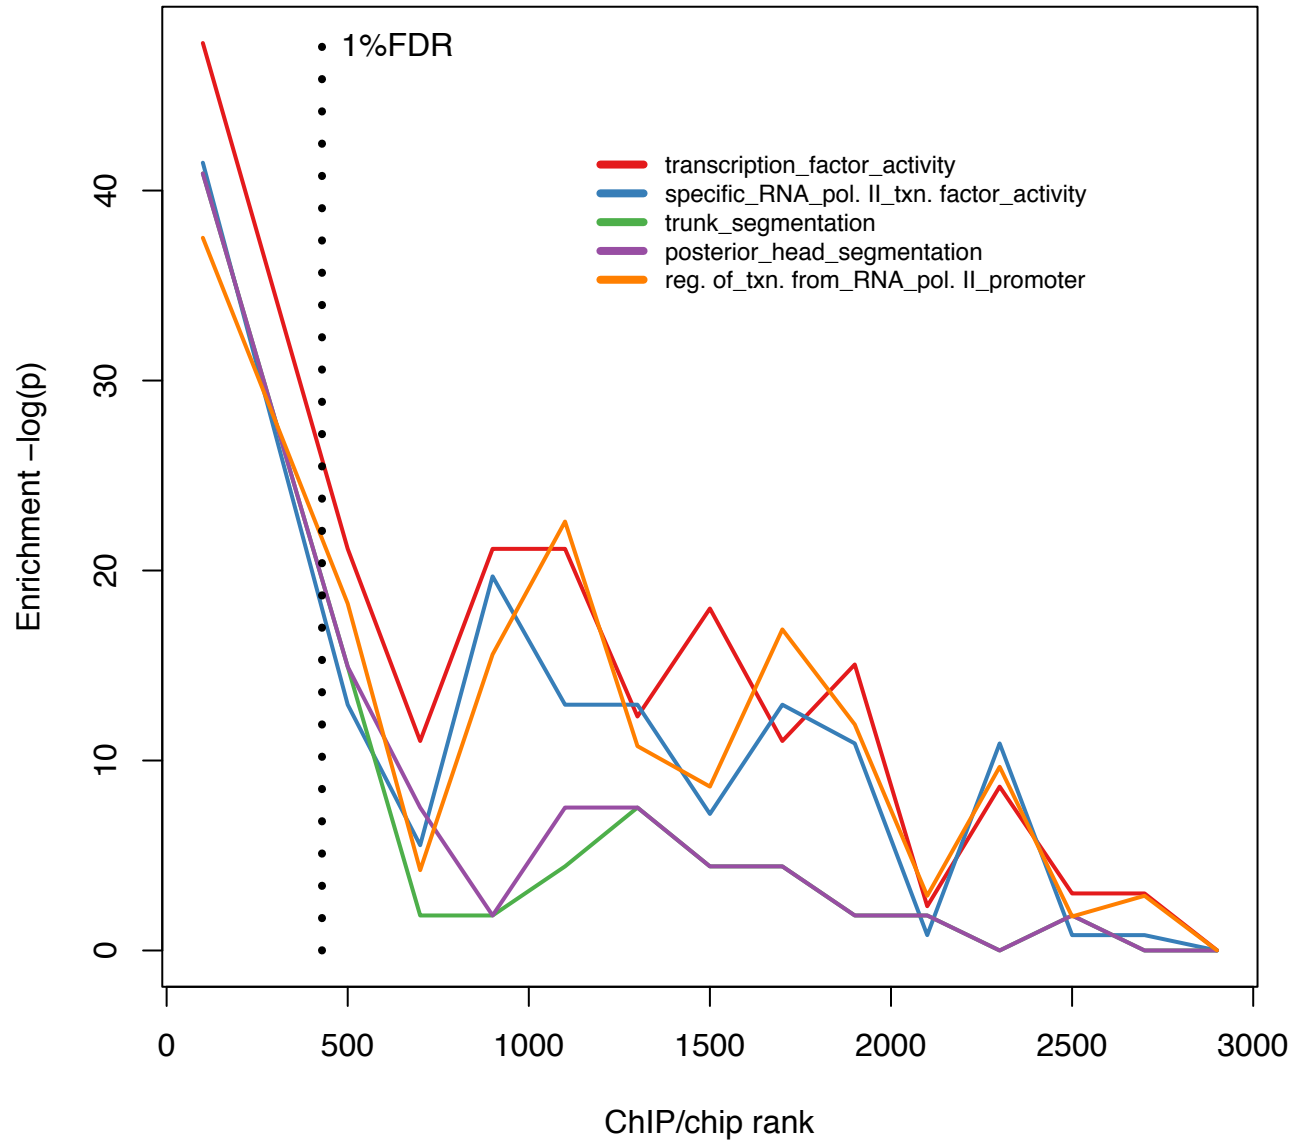

## TWI 2 GO term enrichment

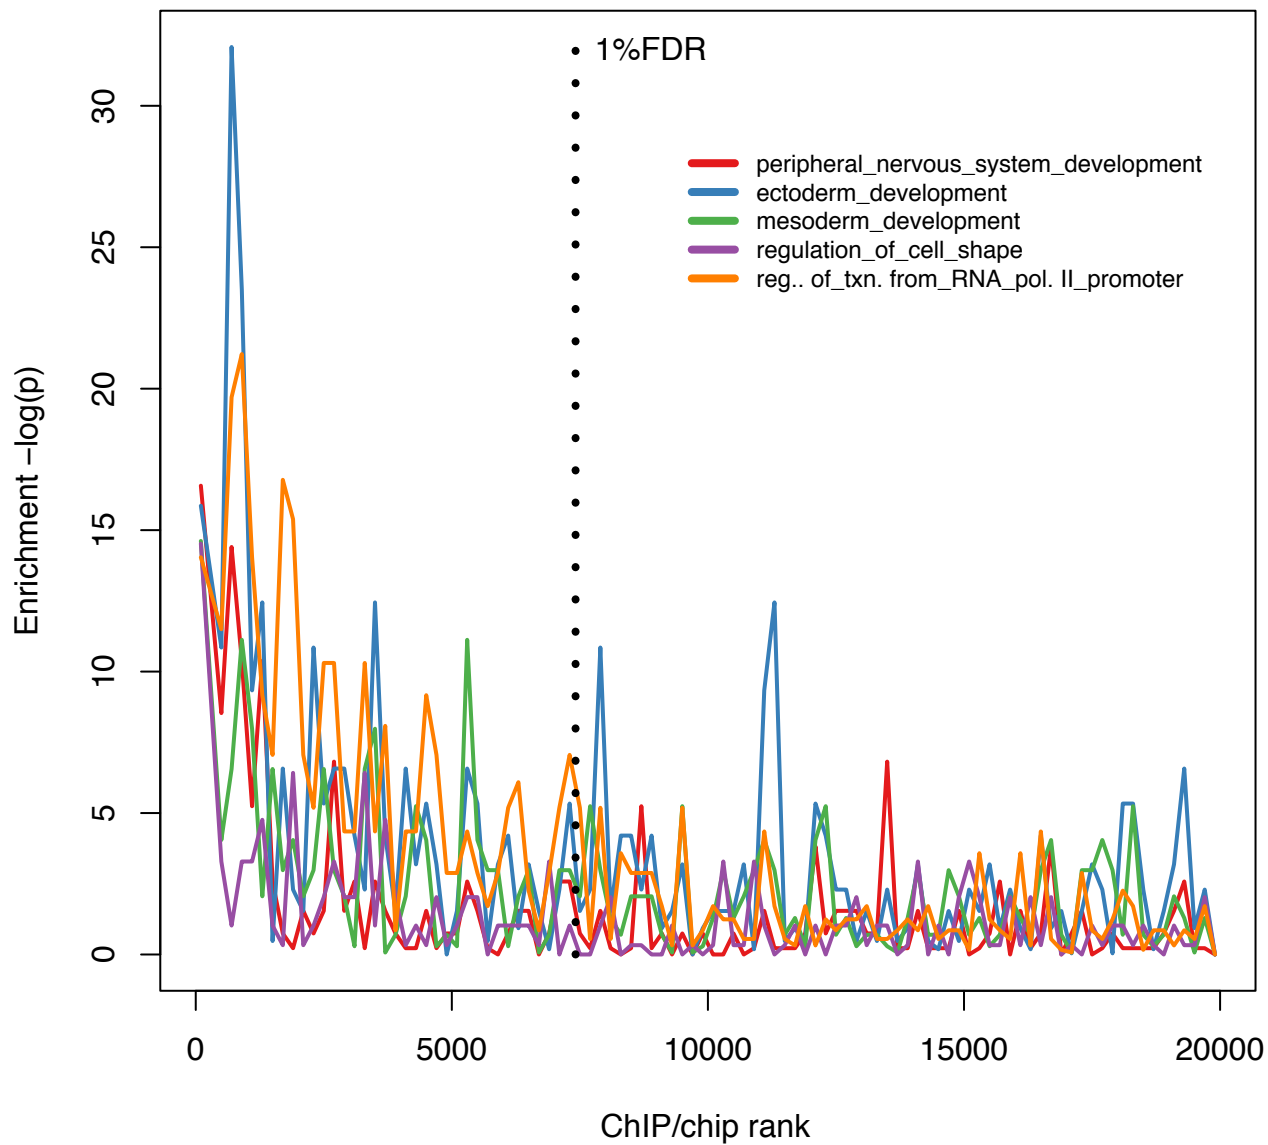

### TFIIB GO term enrichment

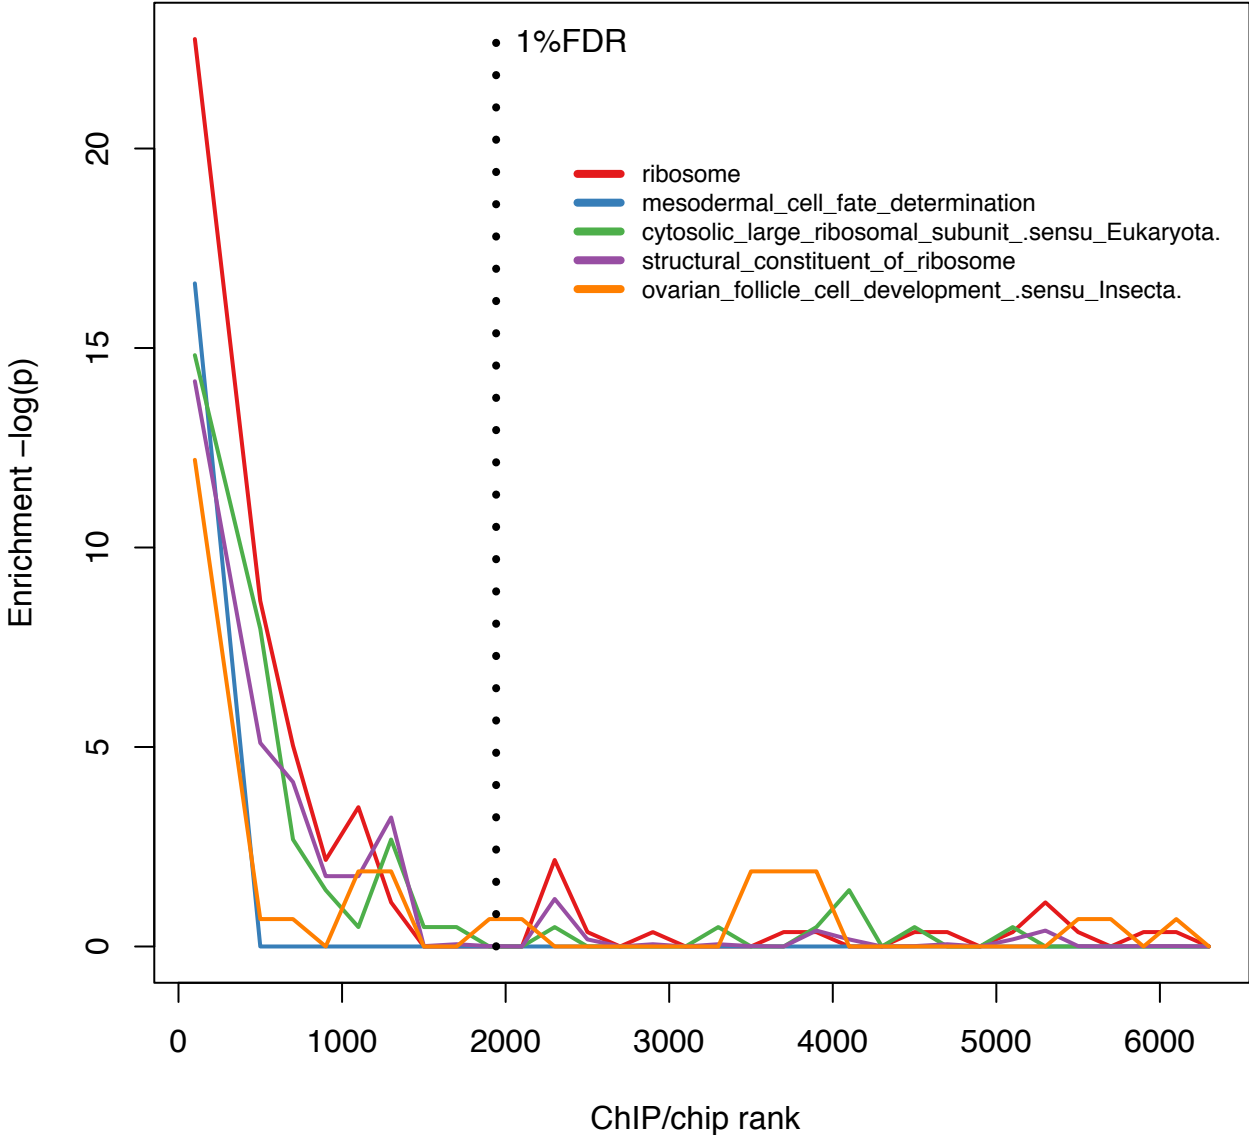

Supplement: 13059_2009_2230_MOESM9_ESM.pdf [file 13059_2009_2230_MOESM9_ESM.pdf]
