# Supplementary material for: Developmental roles of 21 Drosophila transcription factors are determined by quantitative differences in binding to an overlapping set of thousands of genomic regions
Source: Springer Nature journal article supplement (doi:10.1186/gb-2009-10-7-r80), 2009-07-23

### BCD 2 median distance to genes

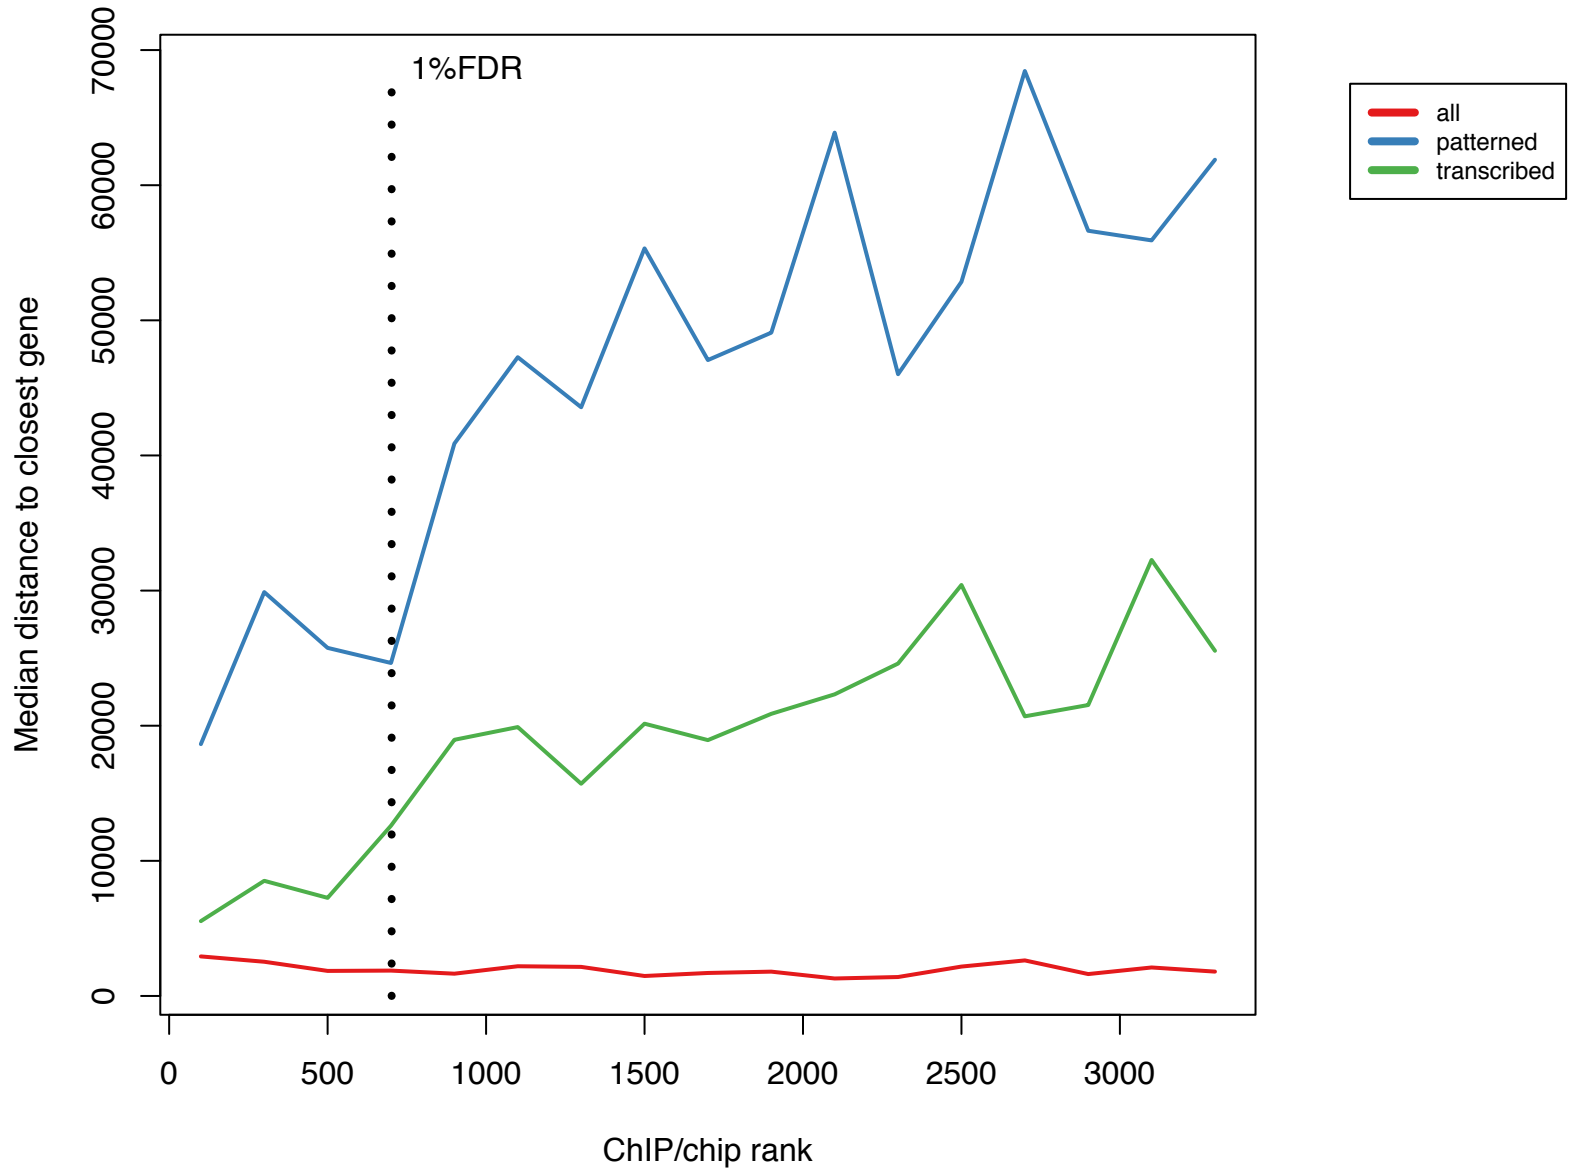

### CAD 1 median distance to genes

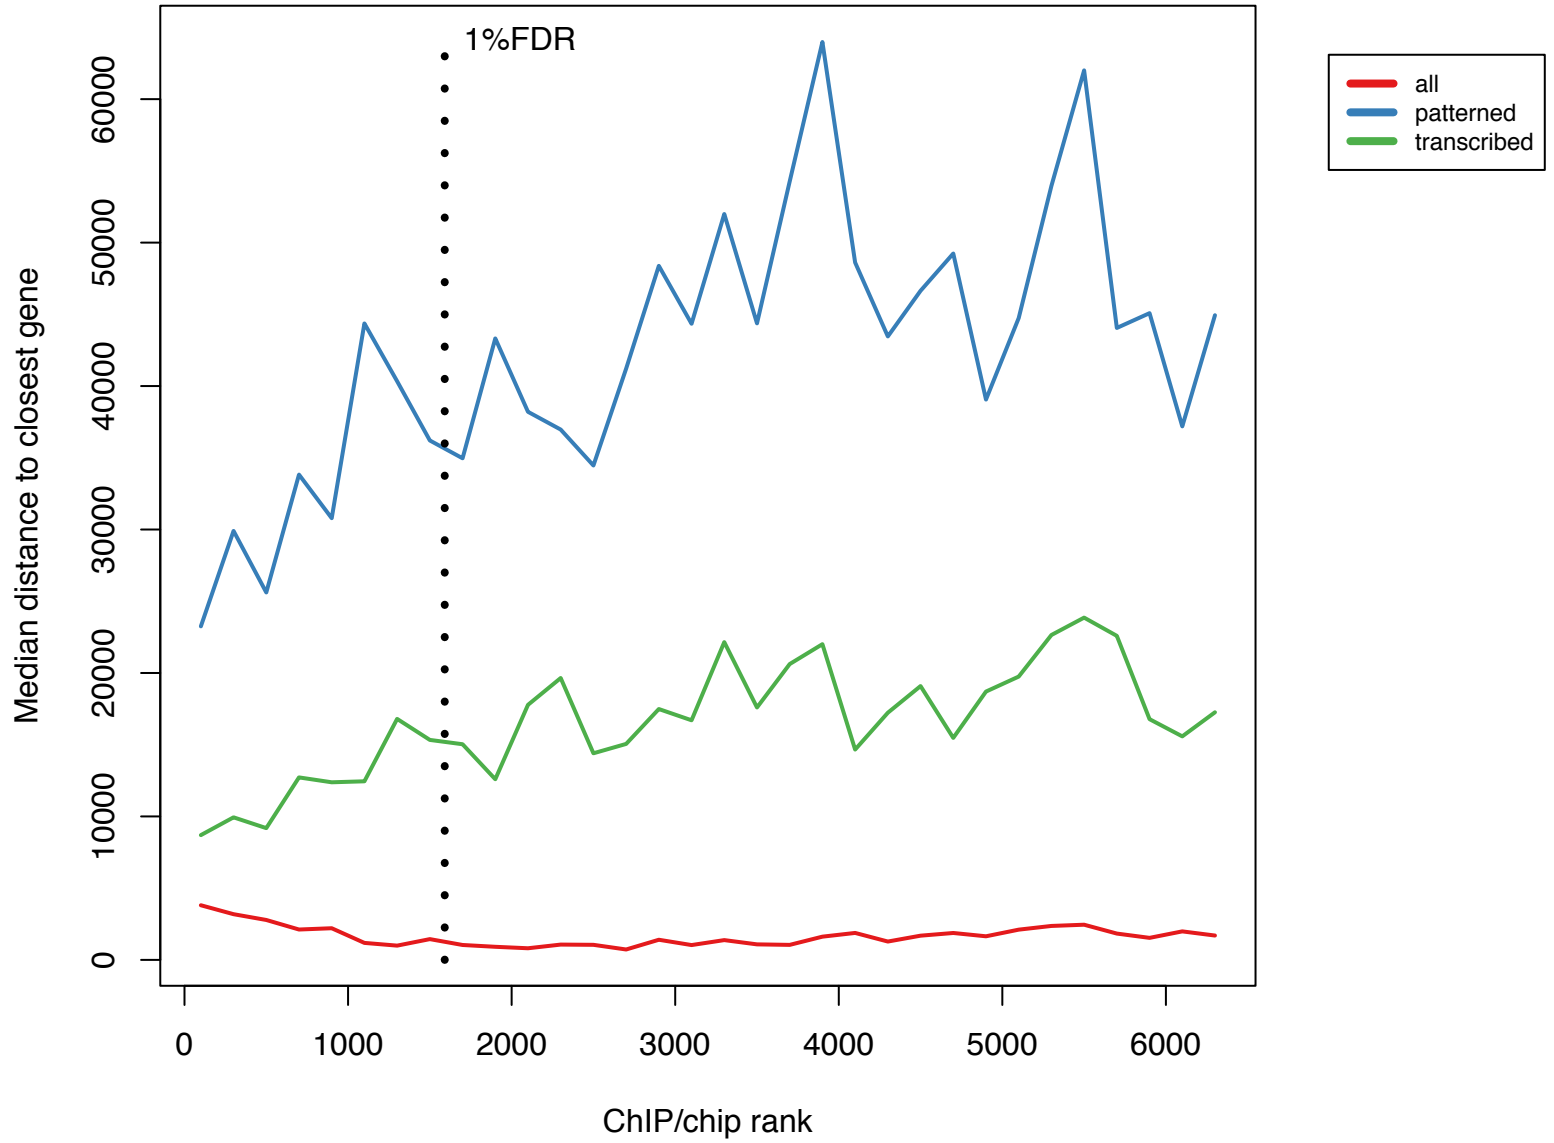

### D 1 median distance to genes

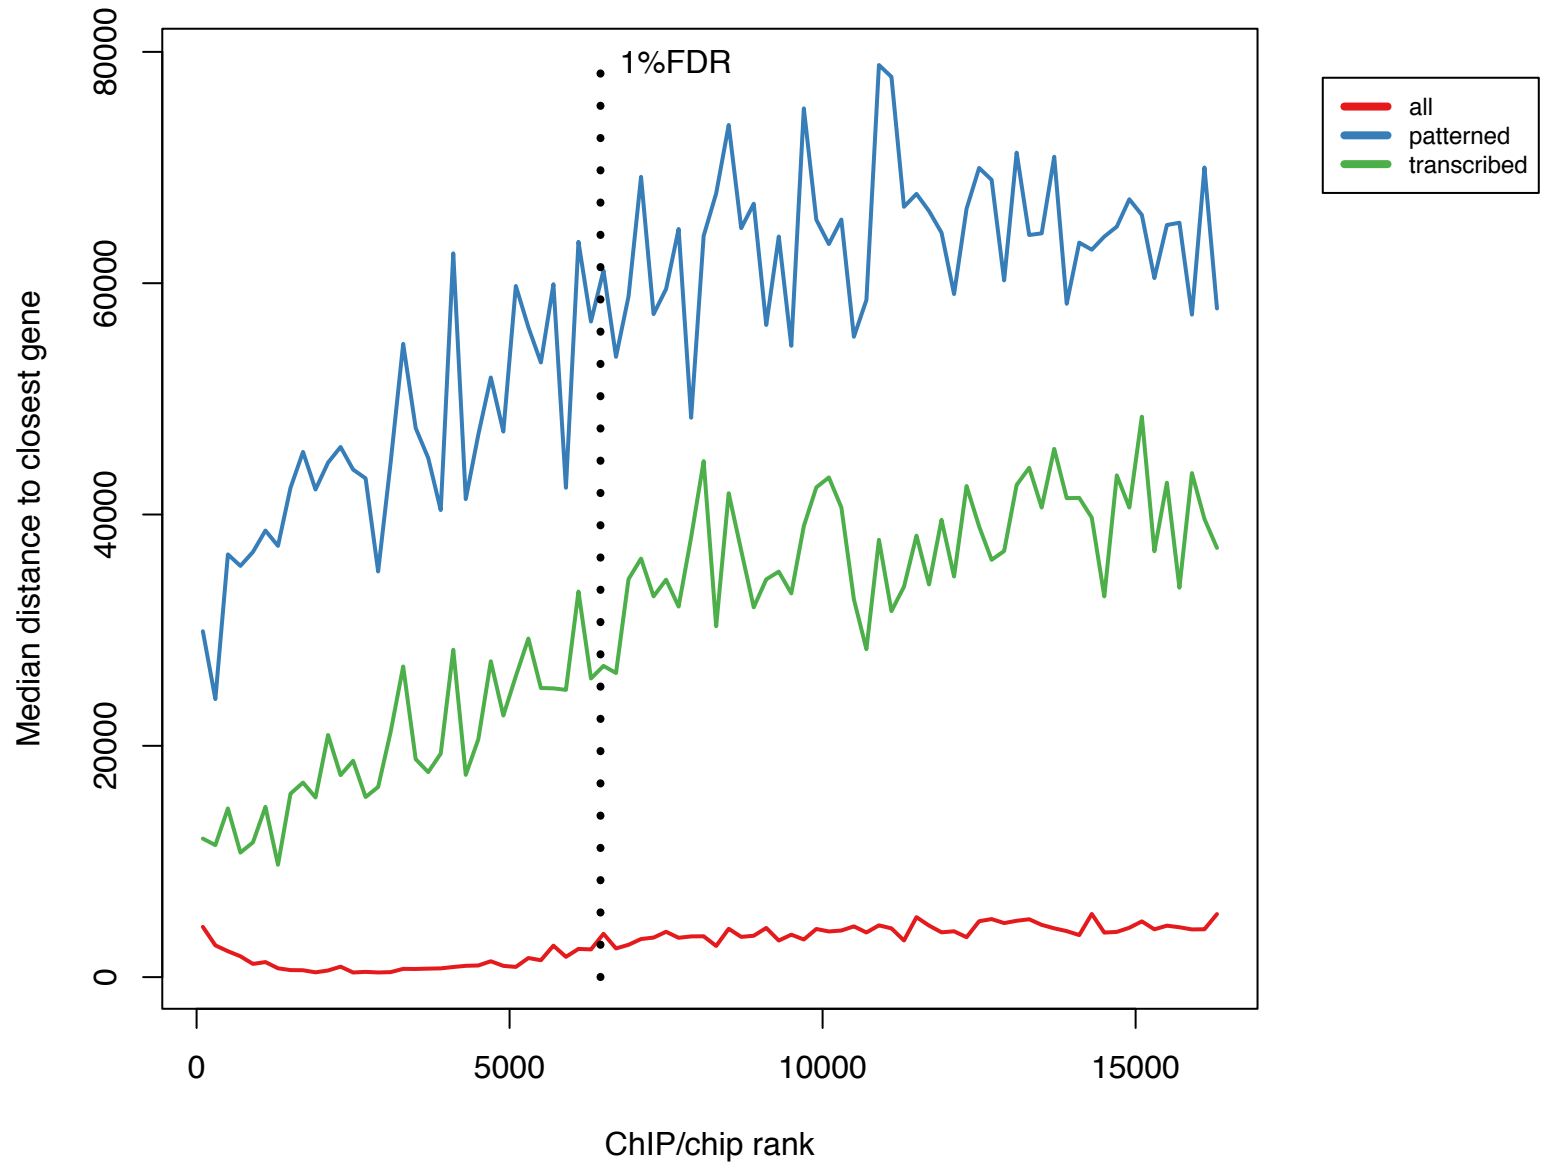

### DA 2 median distance to genes

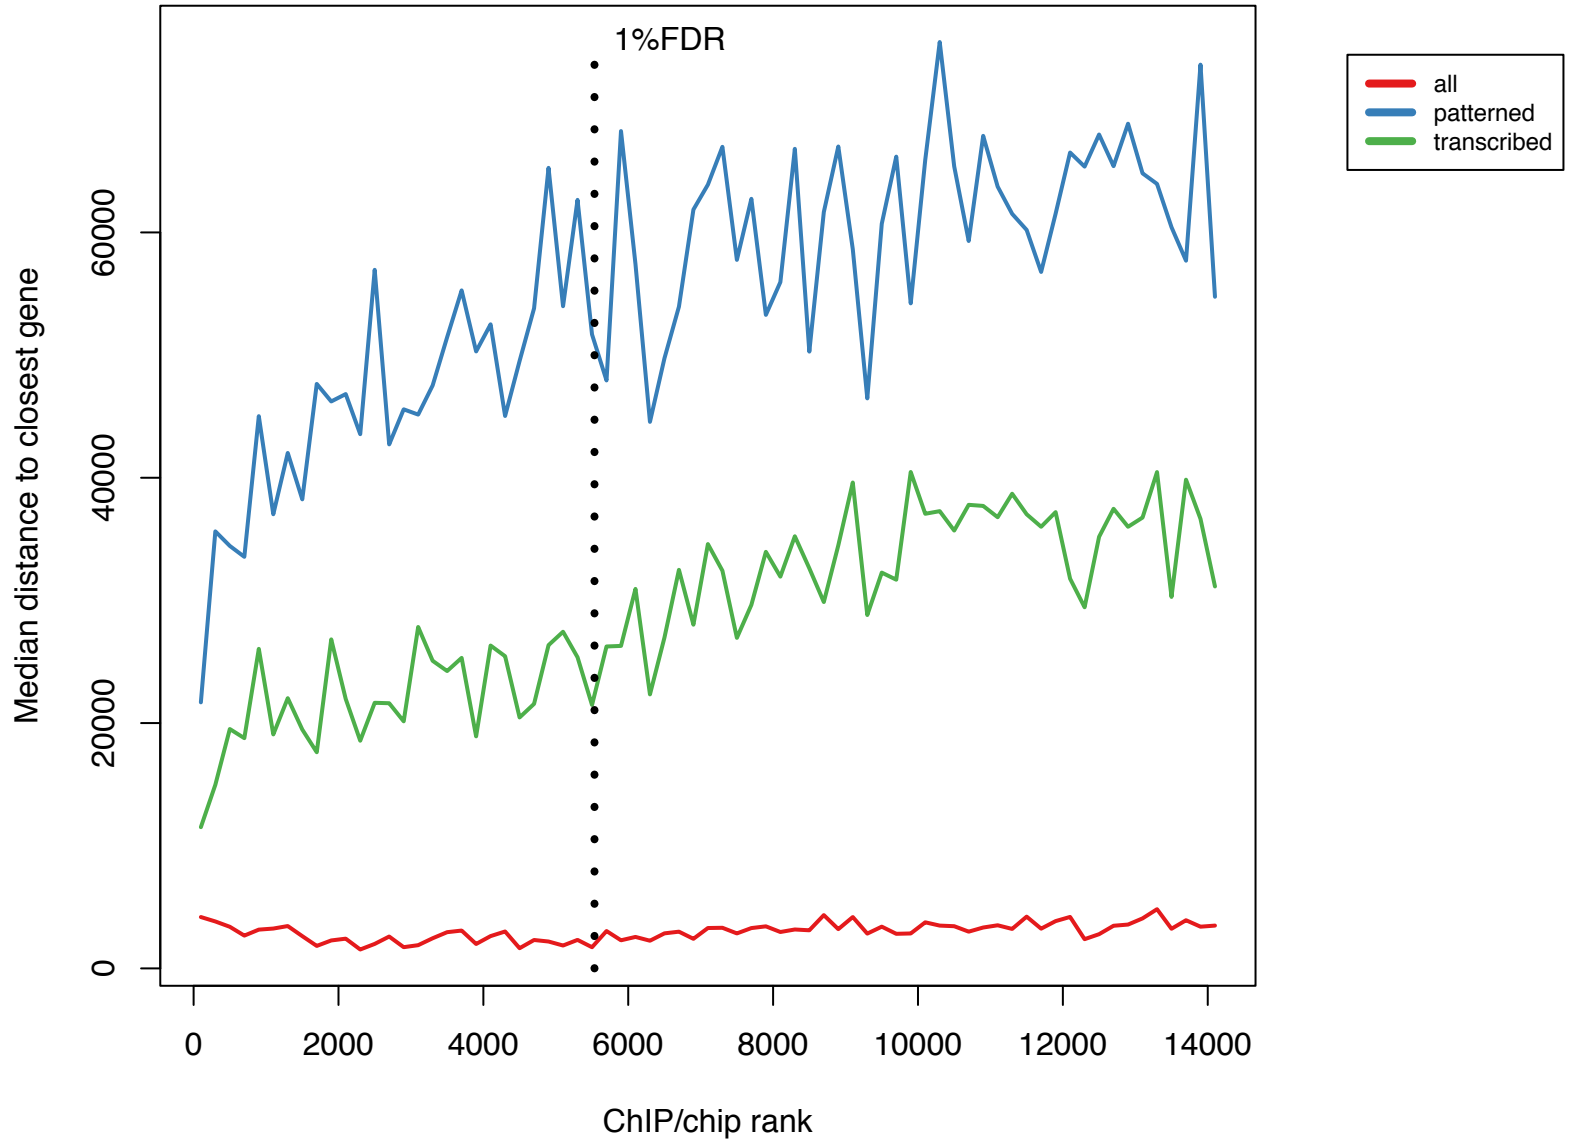

### DL 3 median distance to genes

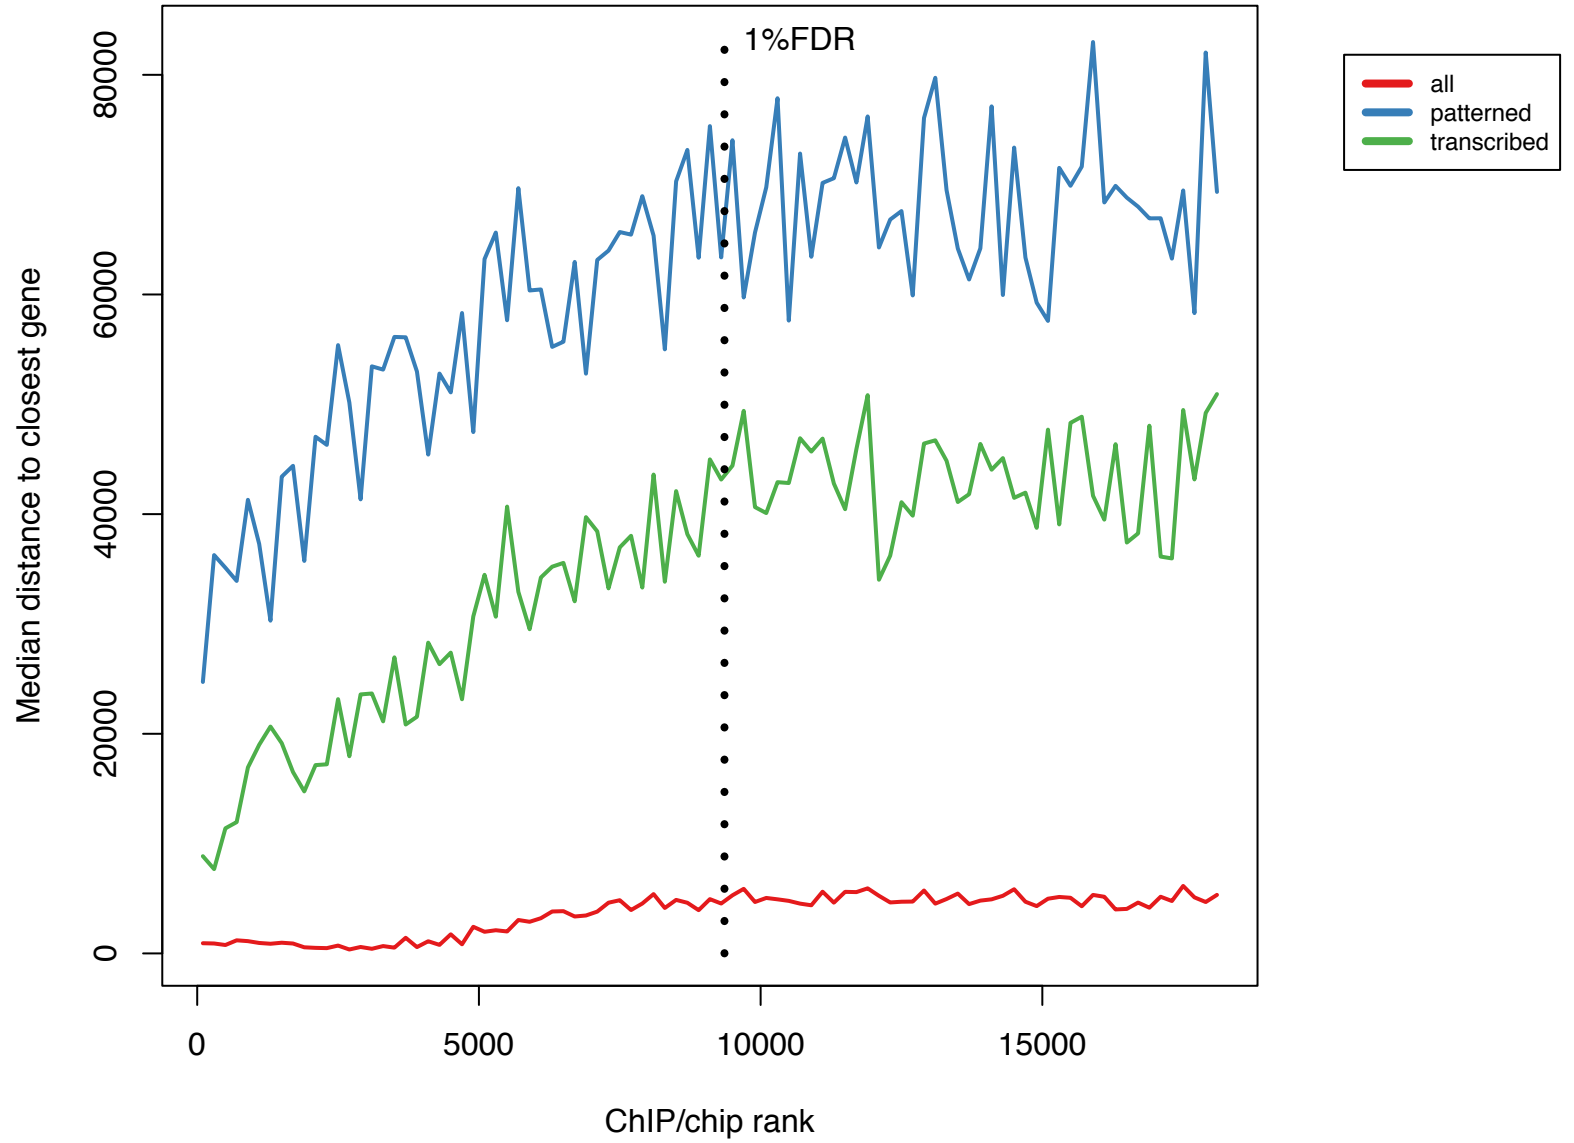

### FTZ 3 median distance to genes

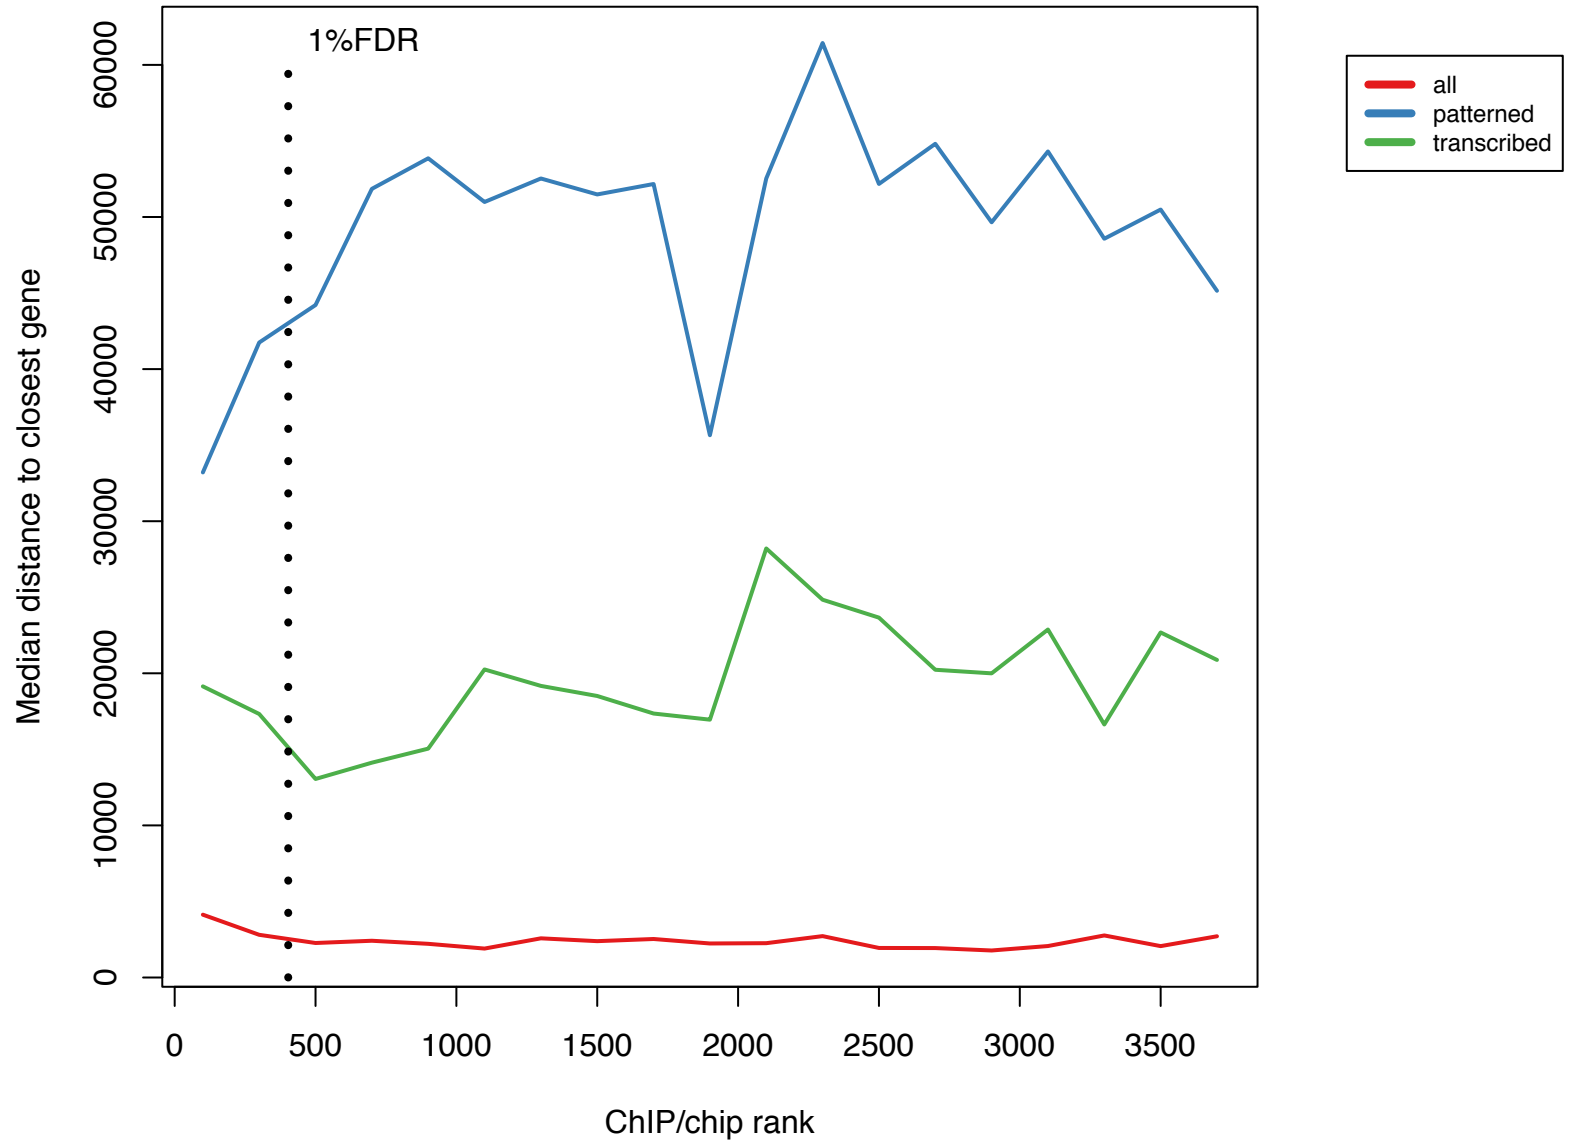

### GT 2 median distance to genes

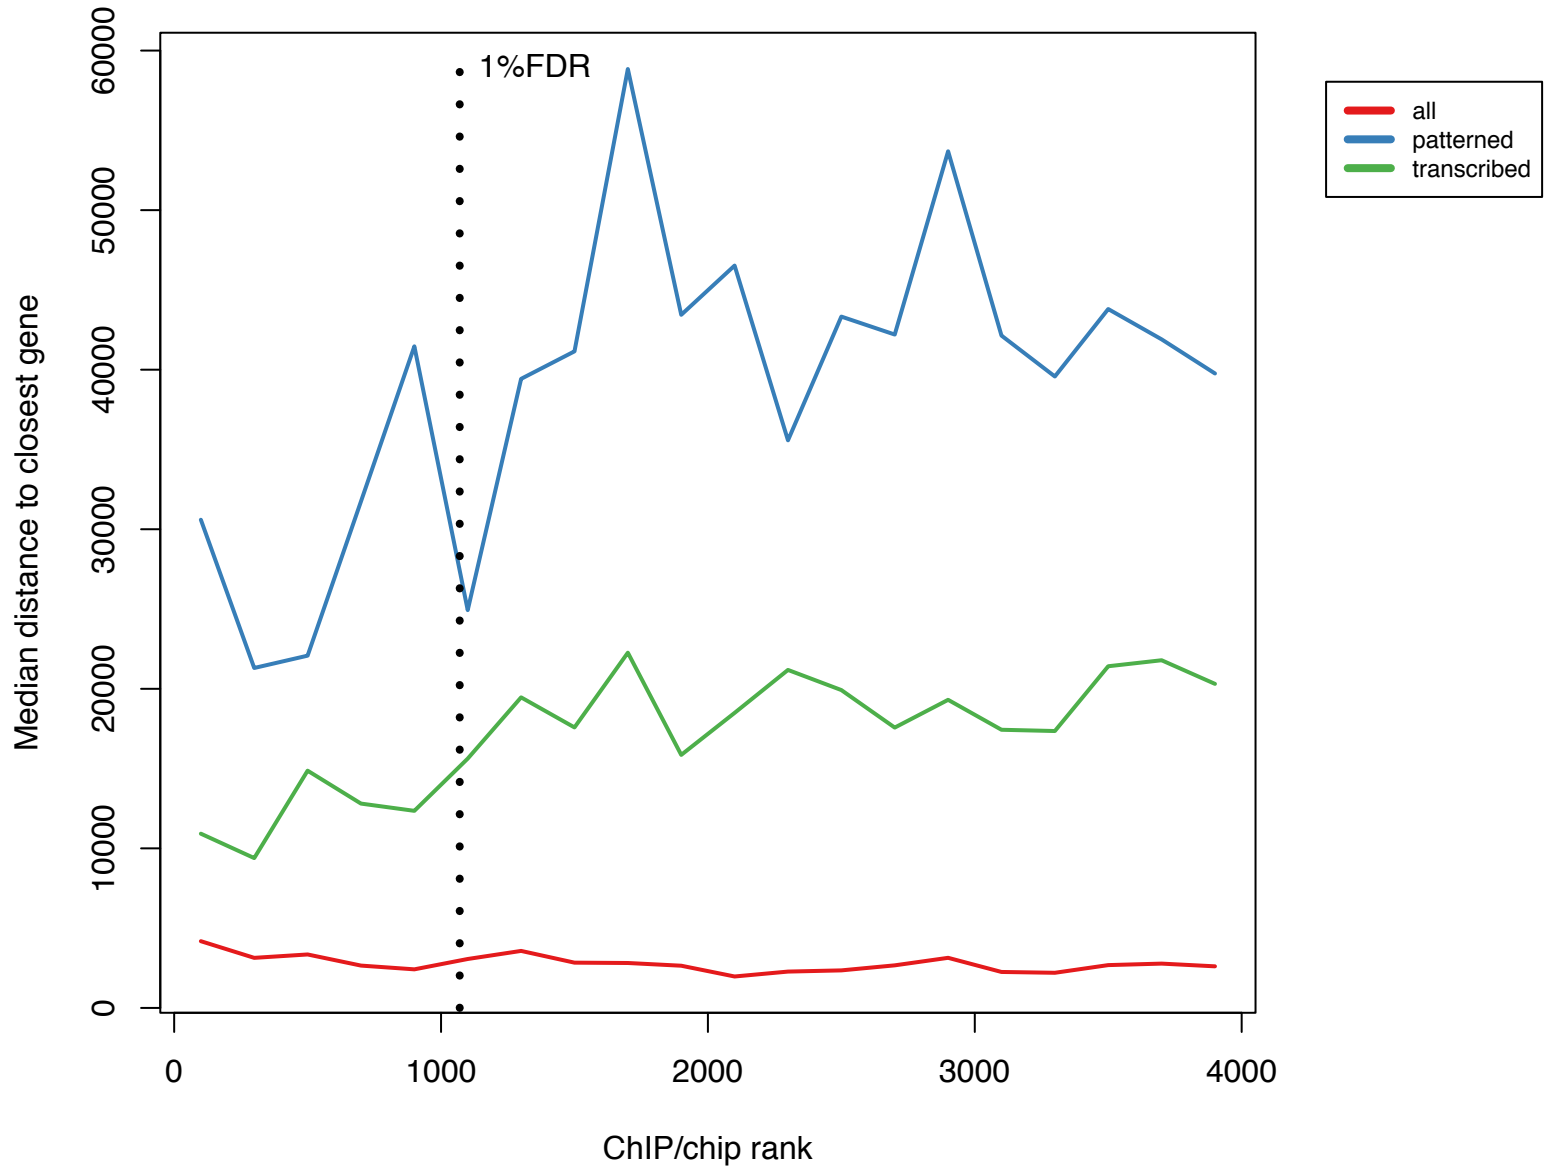

### HRY 2 median distance to genes

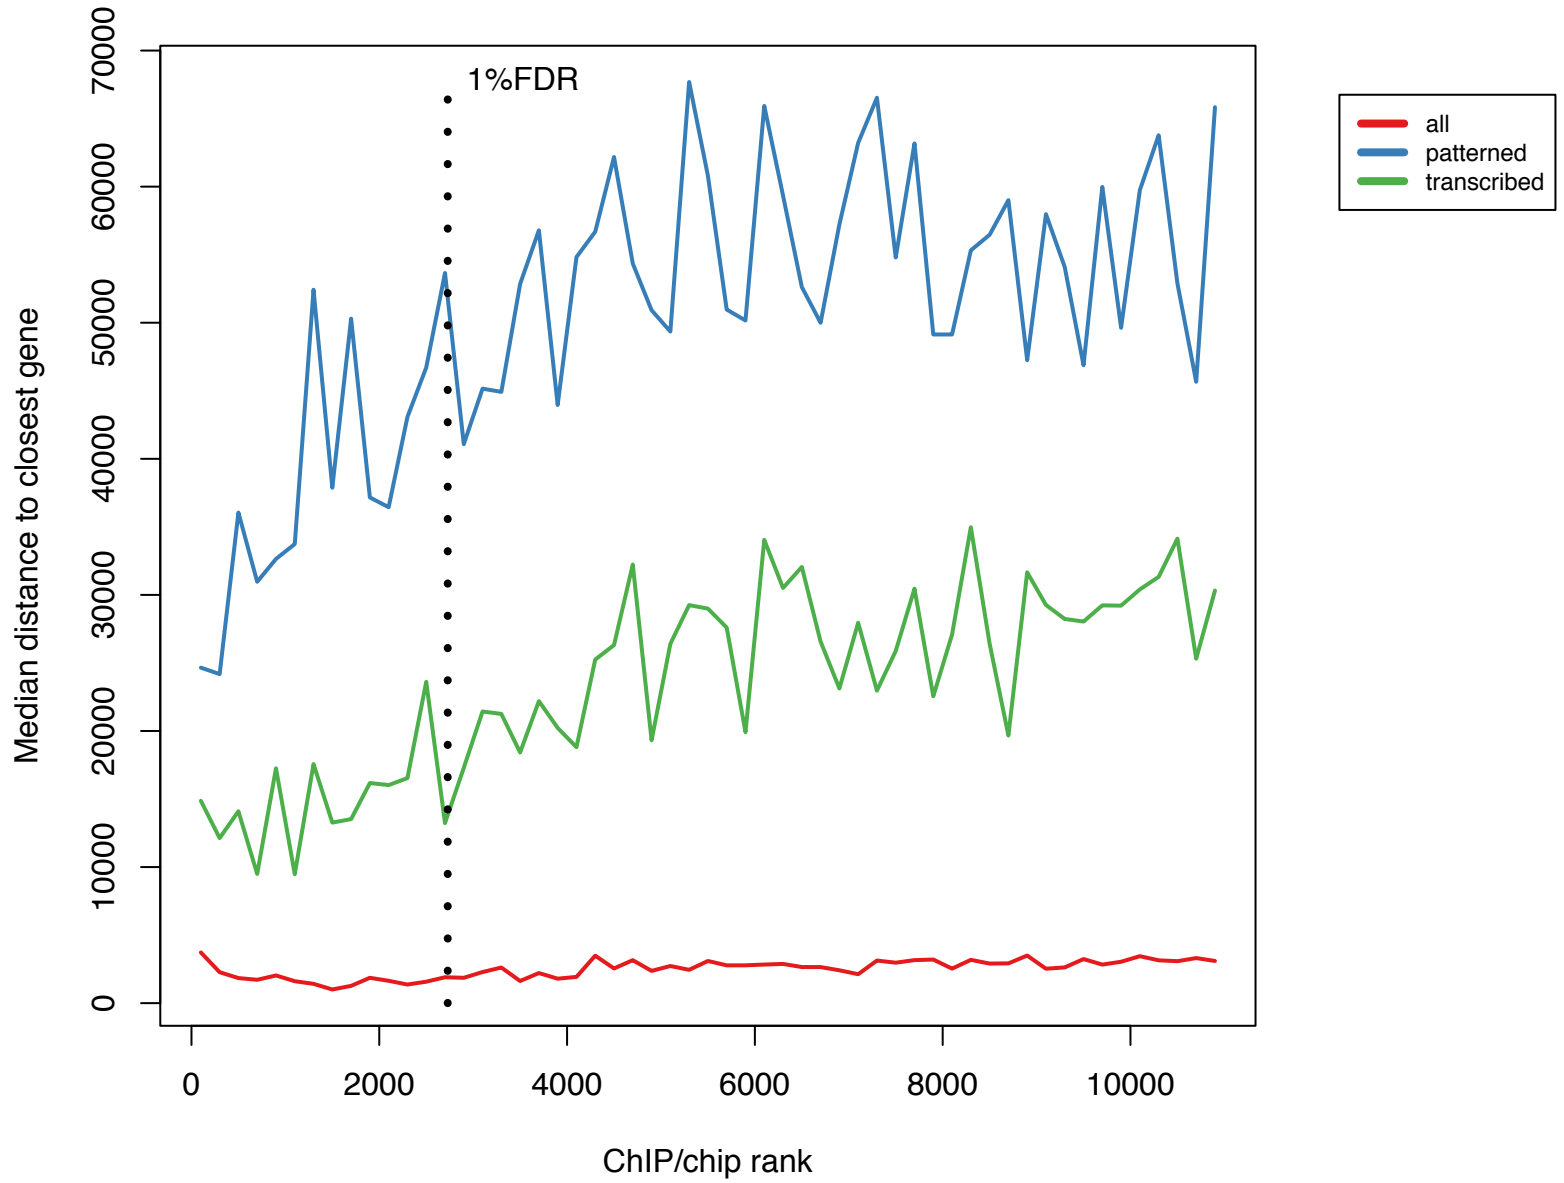



### HB 1 median distance to genes

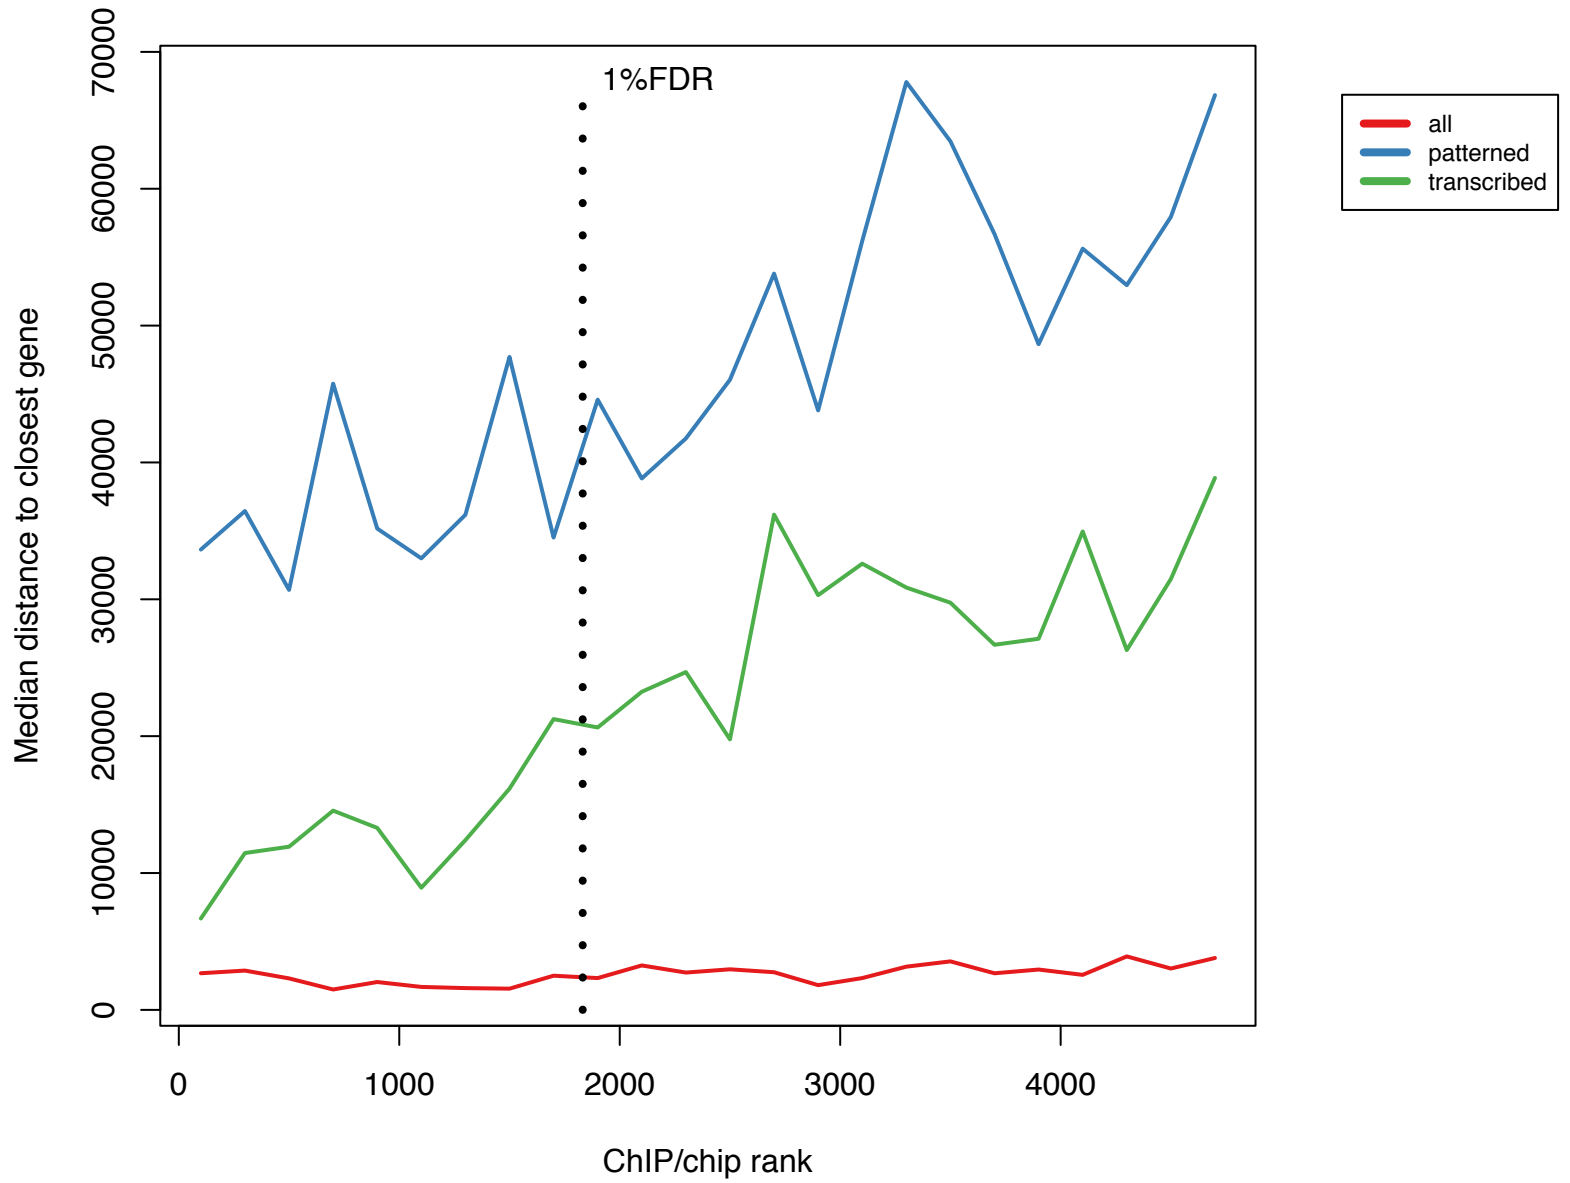

### HKB 1 median distance to genes

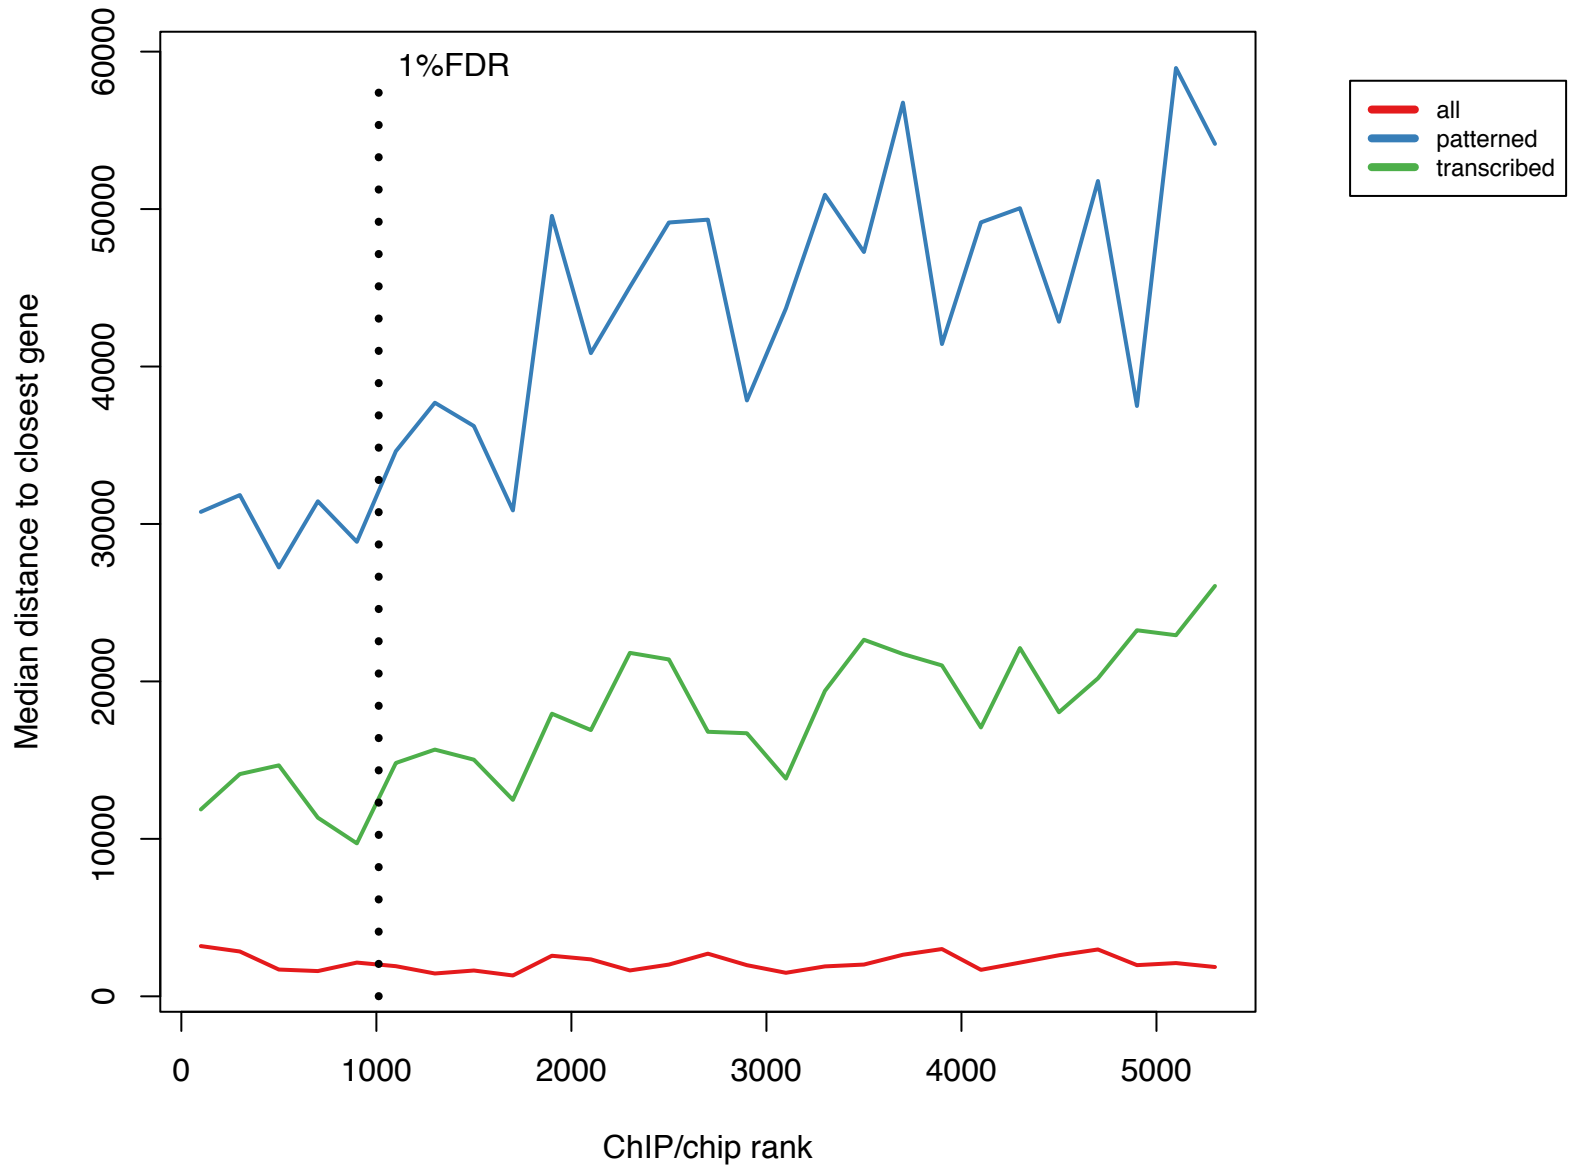

### KNI 2 median distance to genes

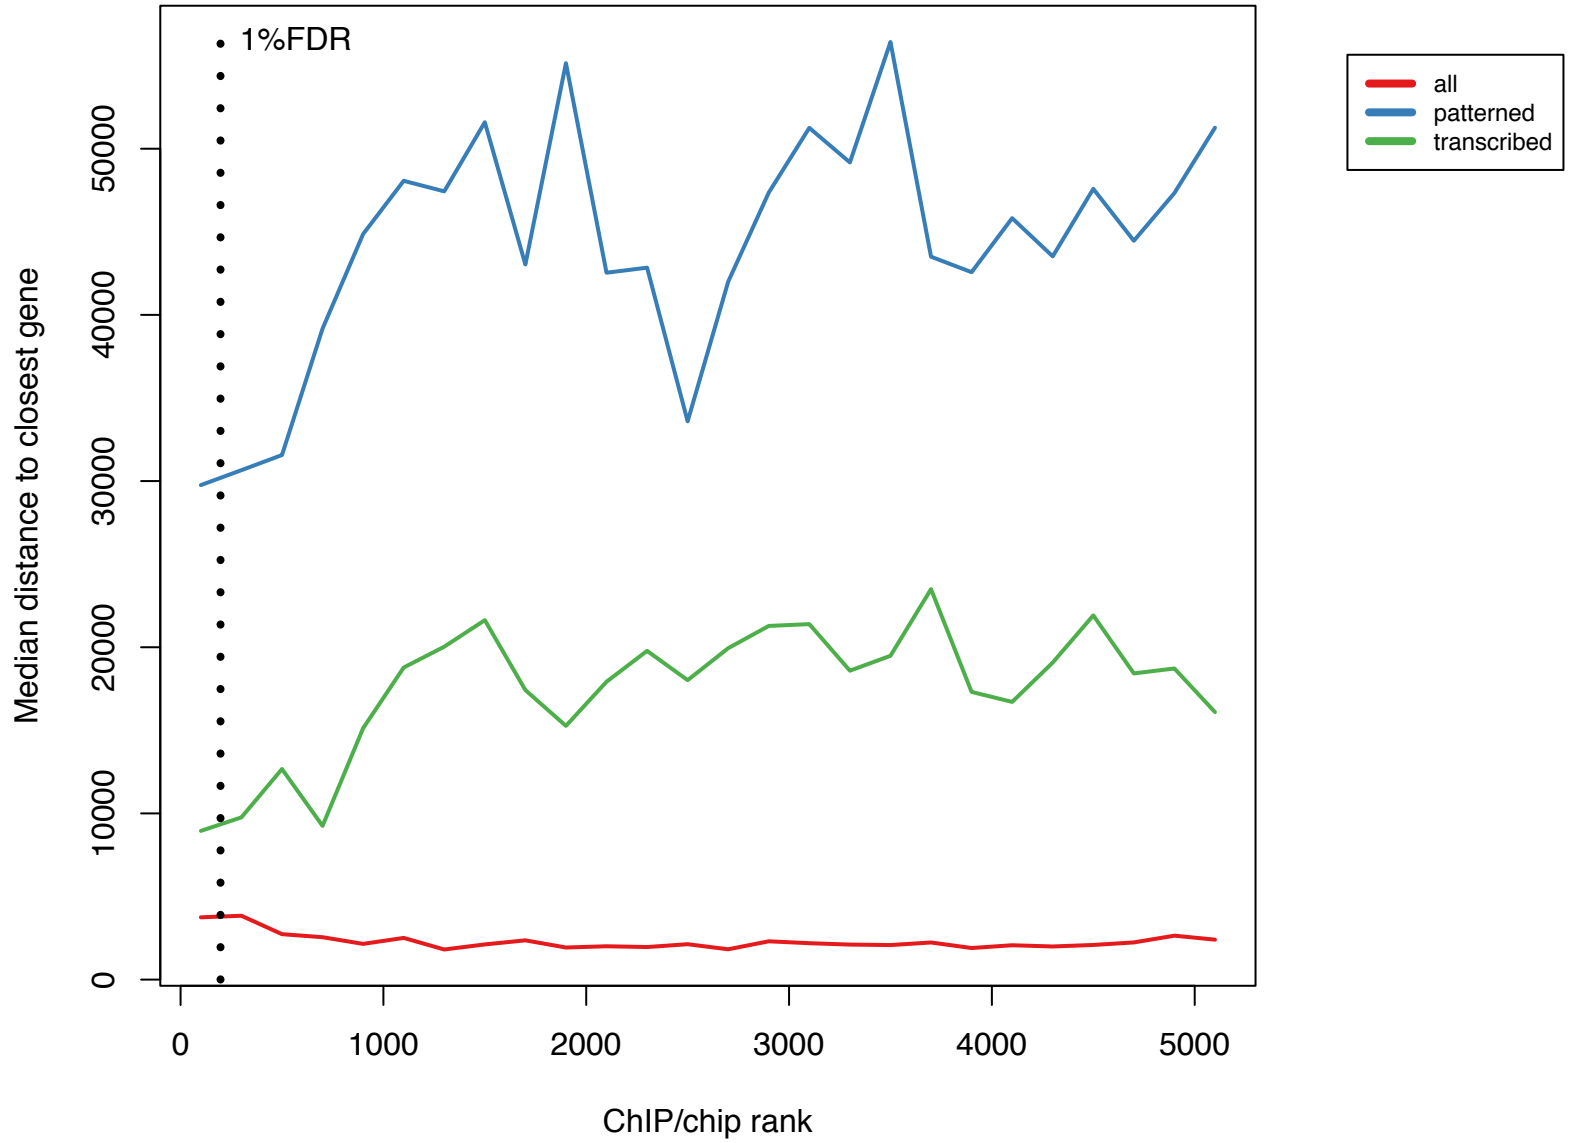

### KR 2 median distance to genes

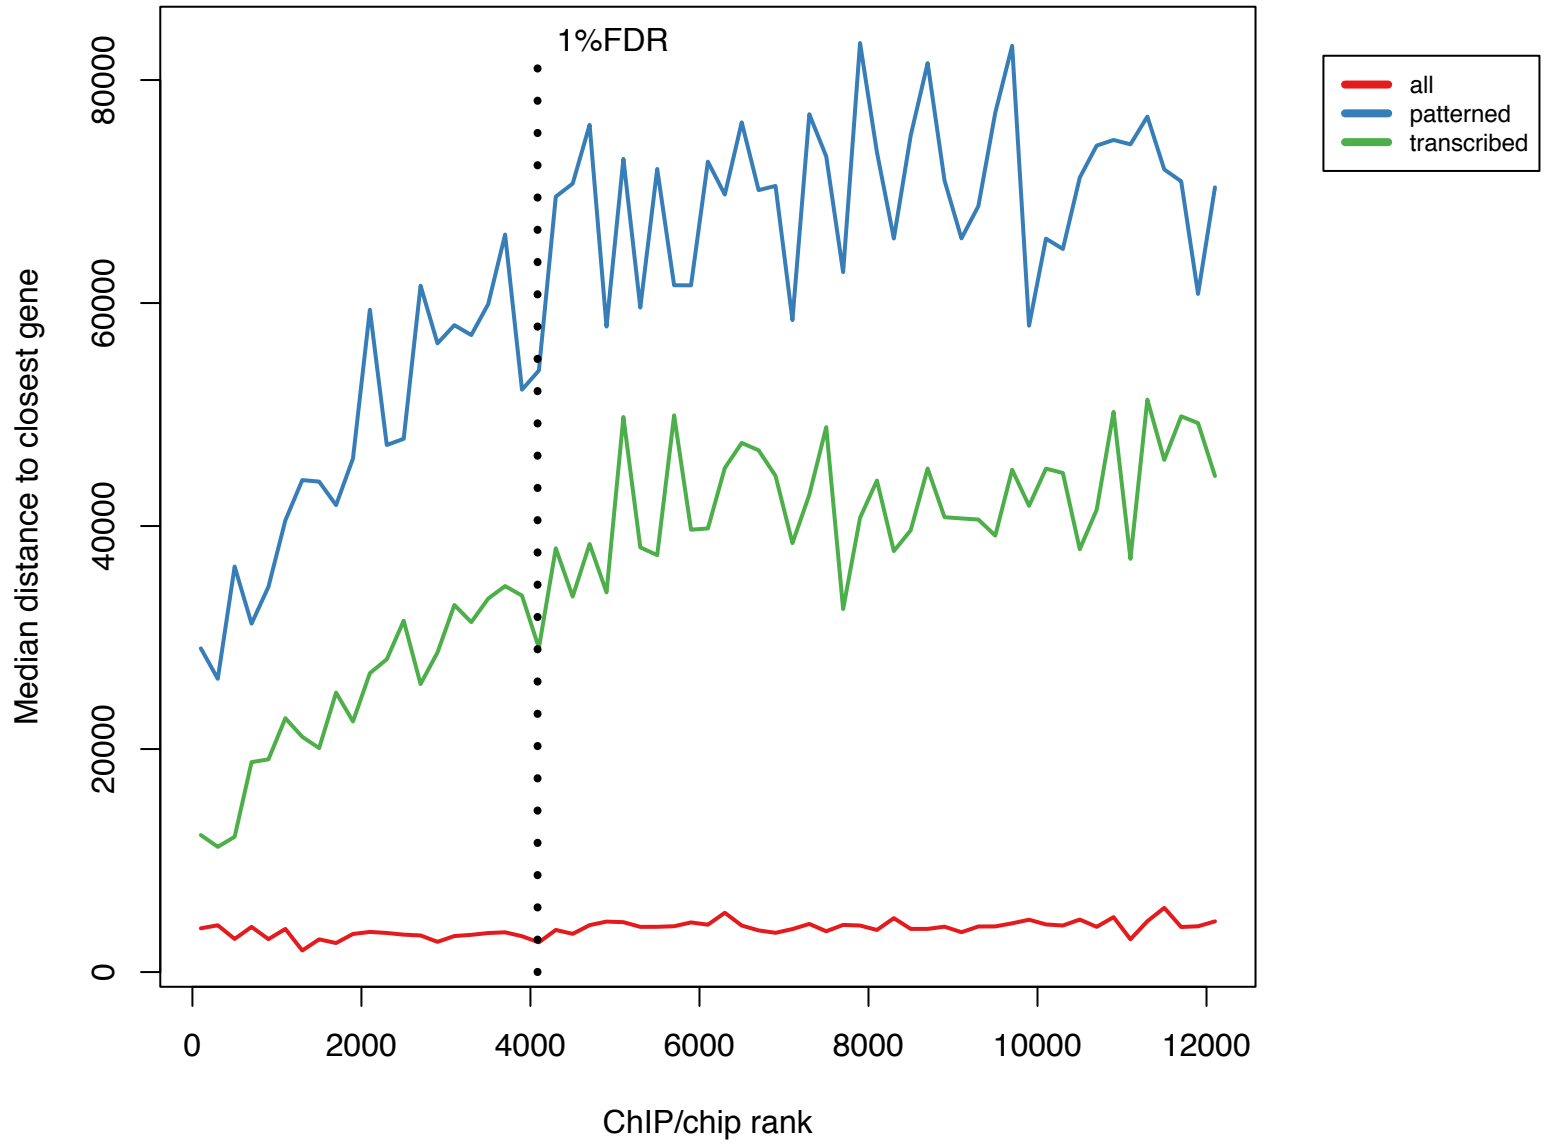

### MAD 2 median distance to genes

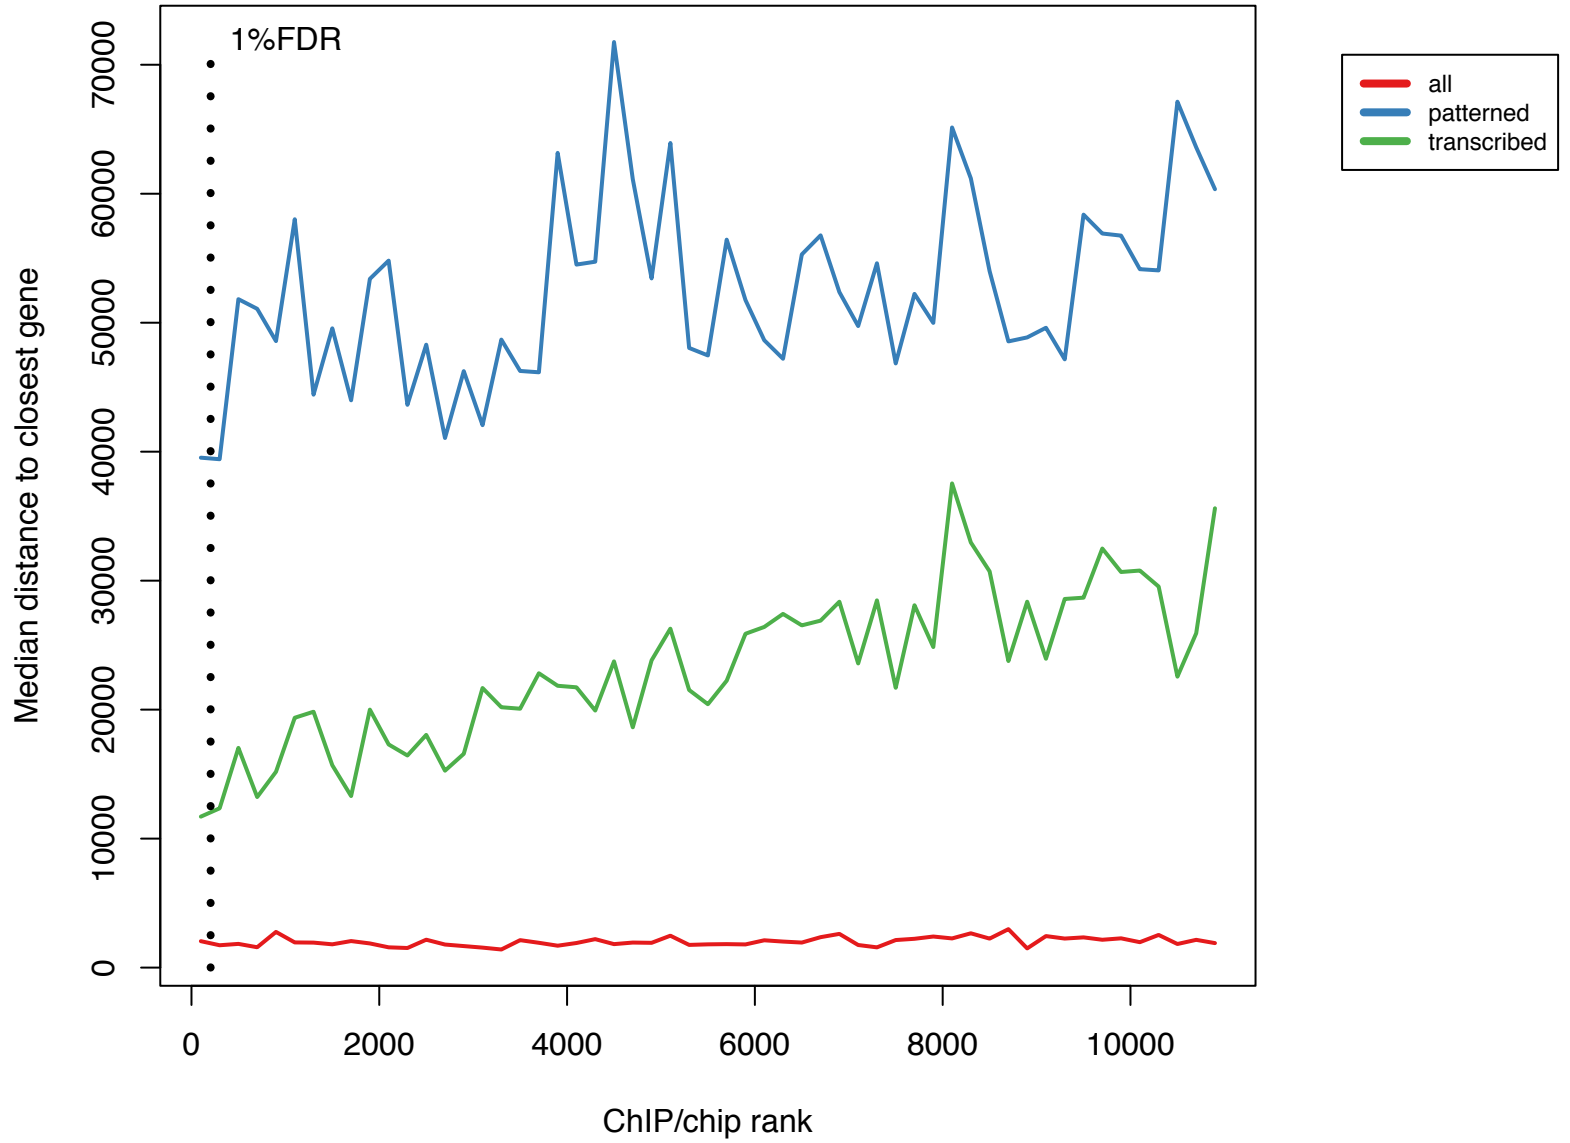

### MED 2 median distance to genes

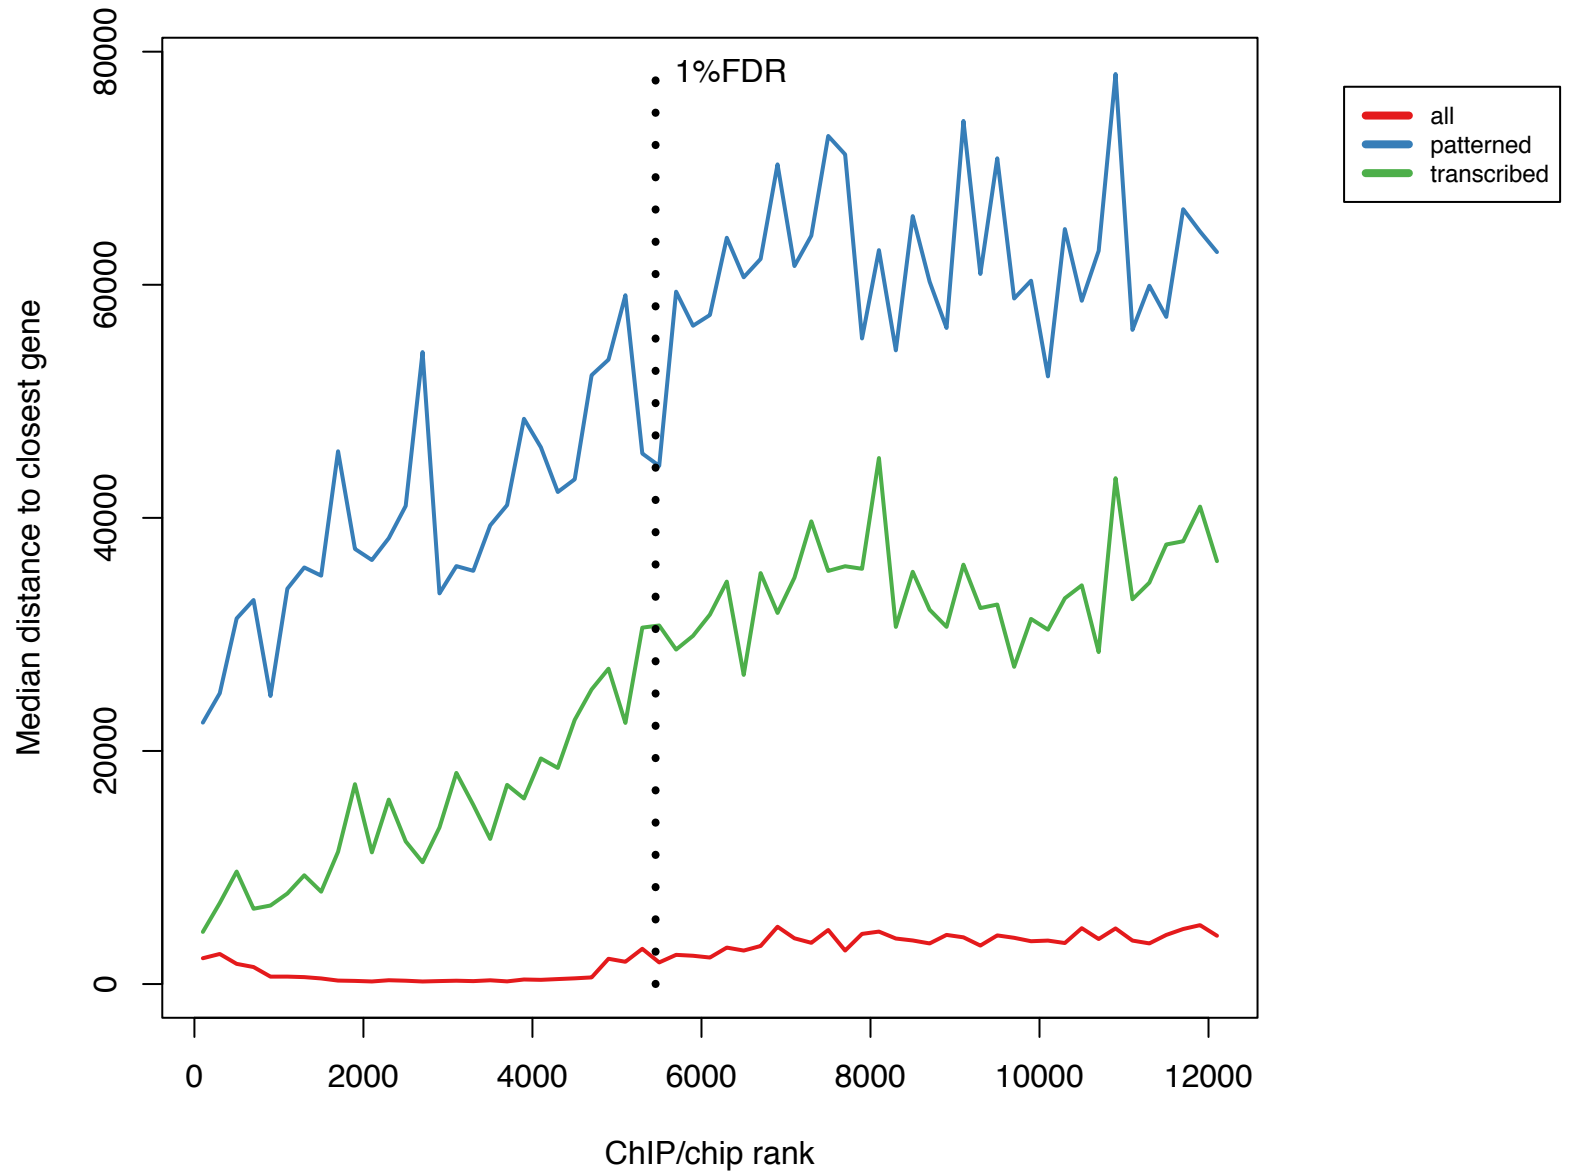

### PRD 1 median distance to genes

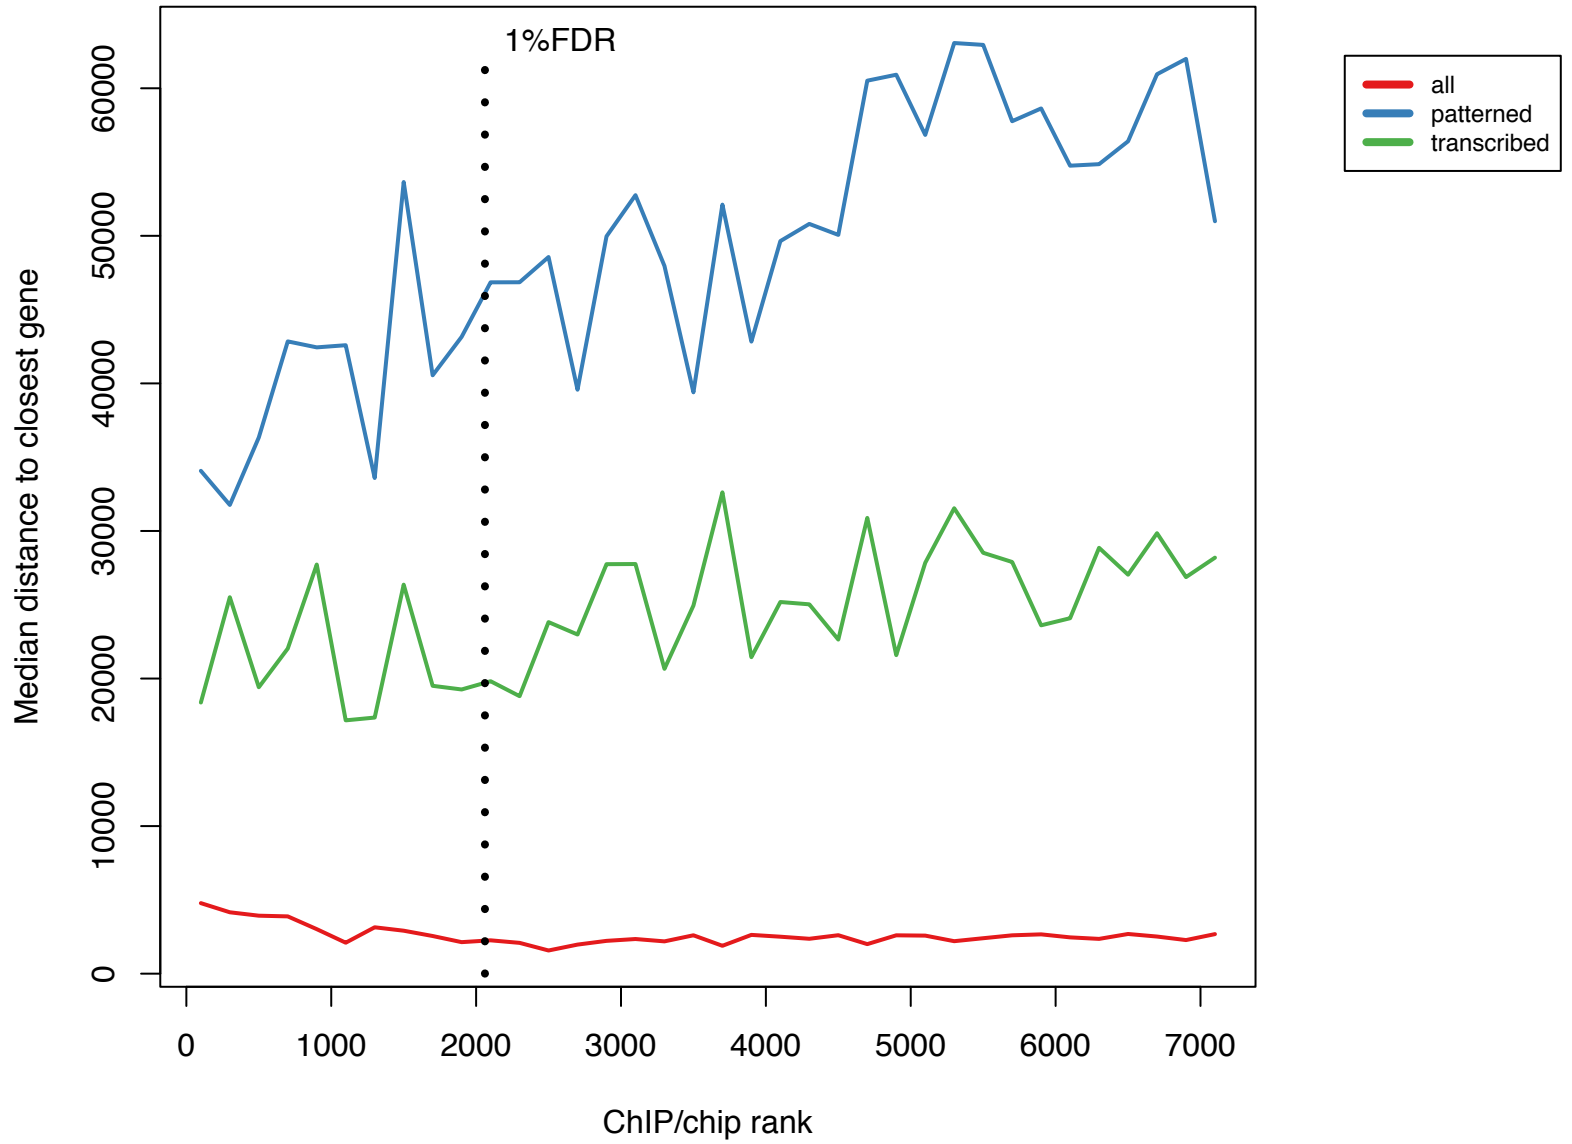

### RUN 1 median distance to genes

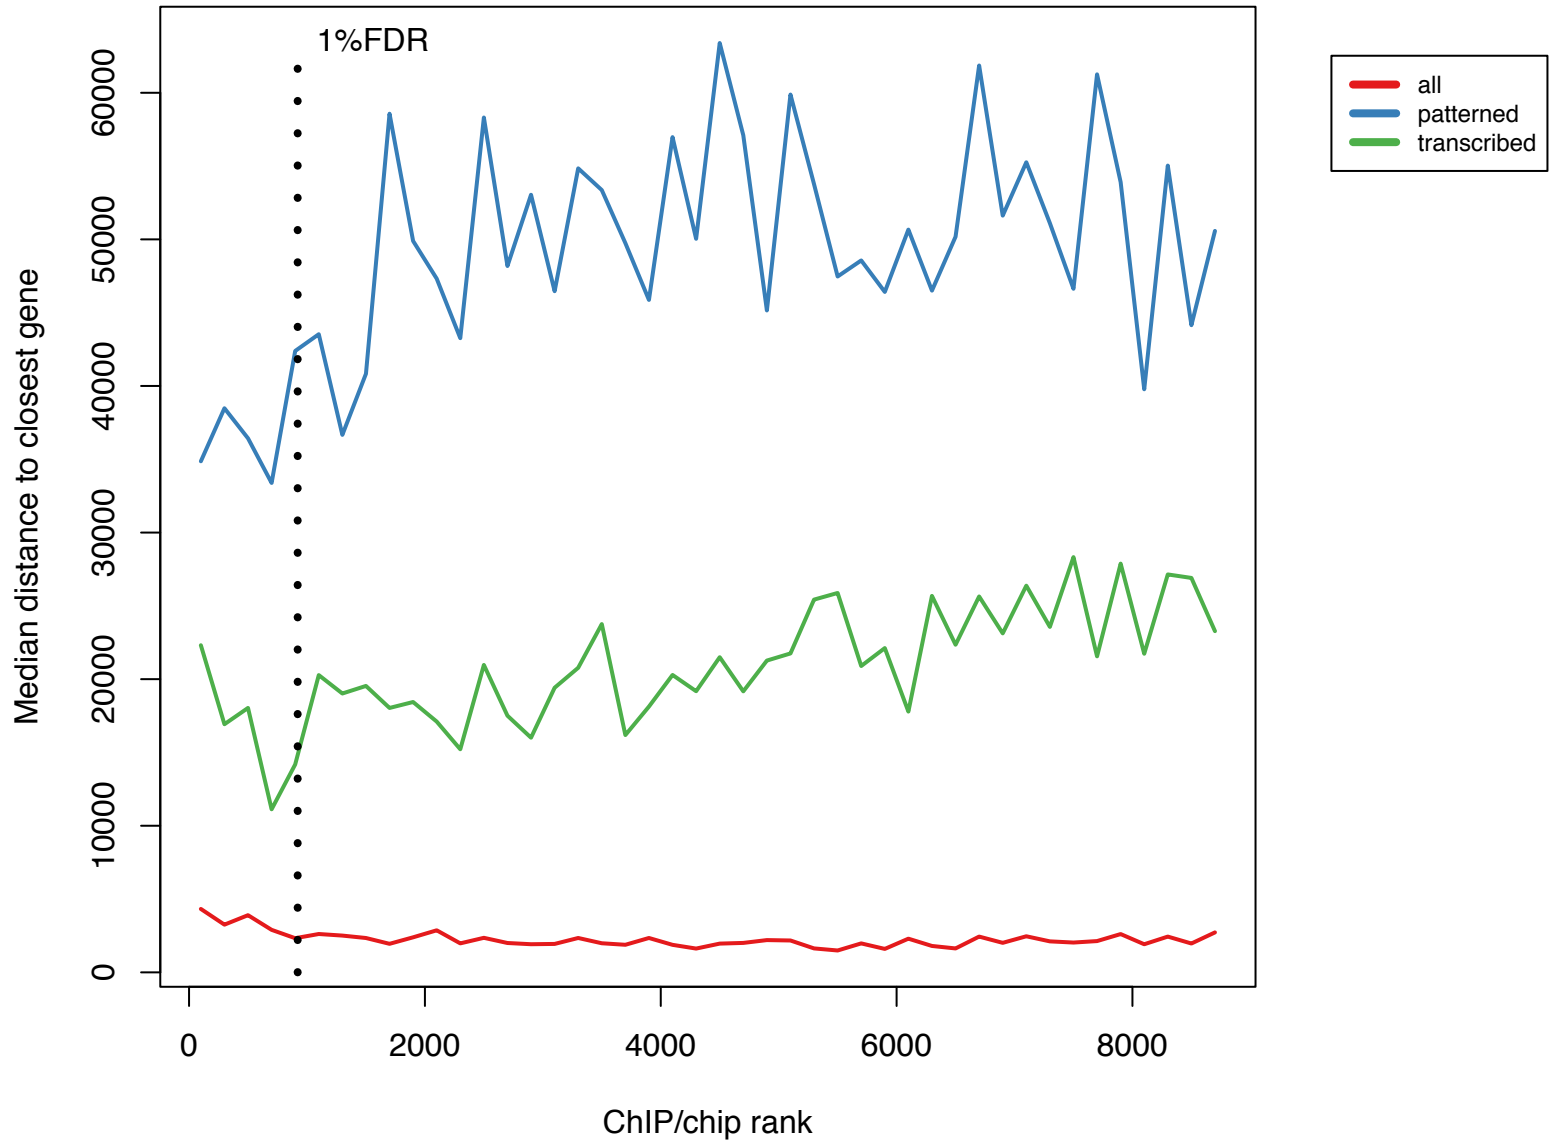



### SHN 2 median distance to genes

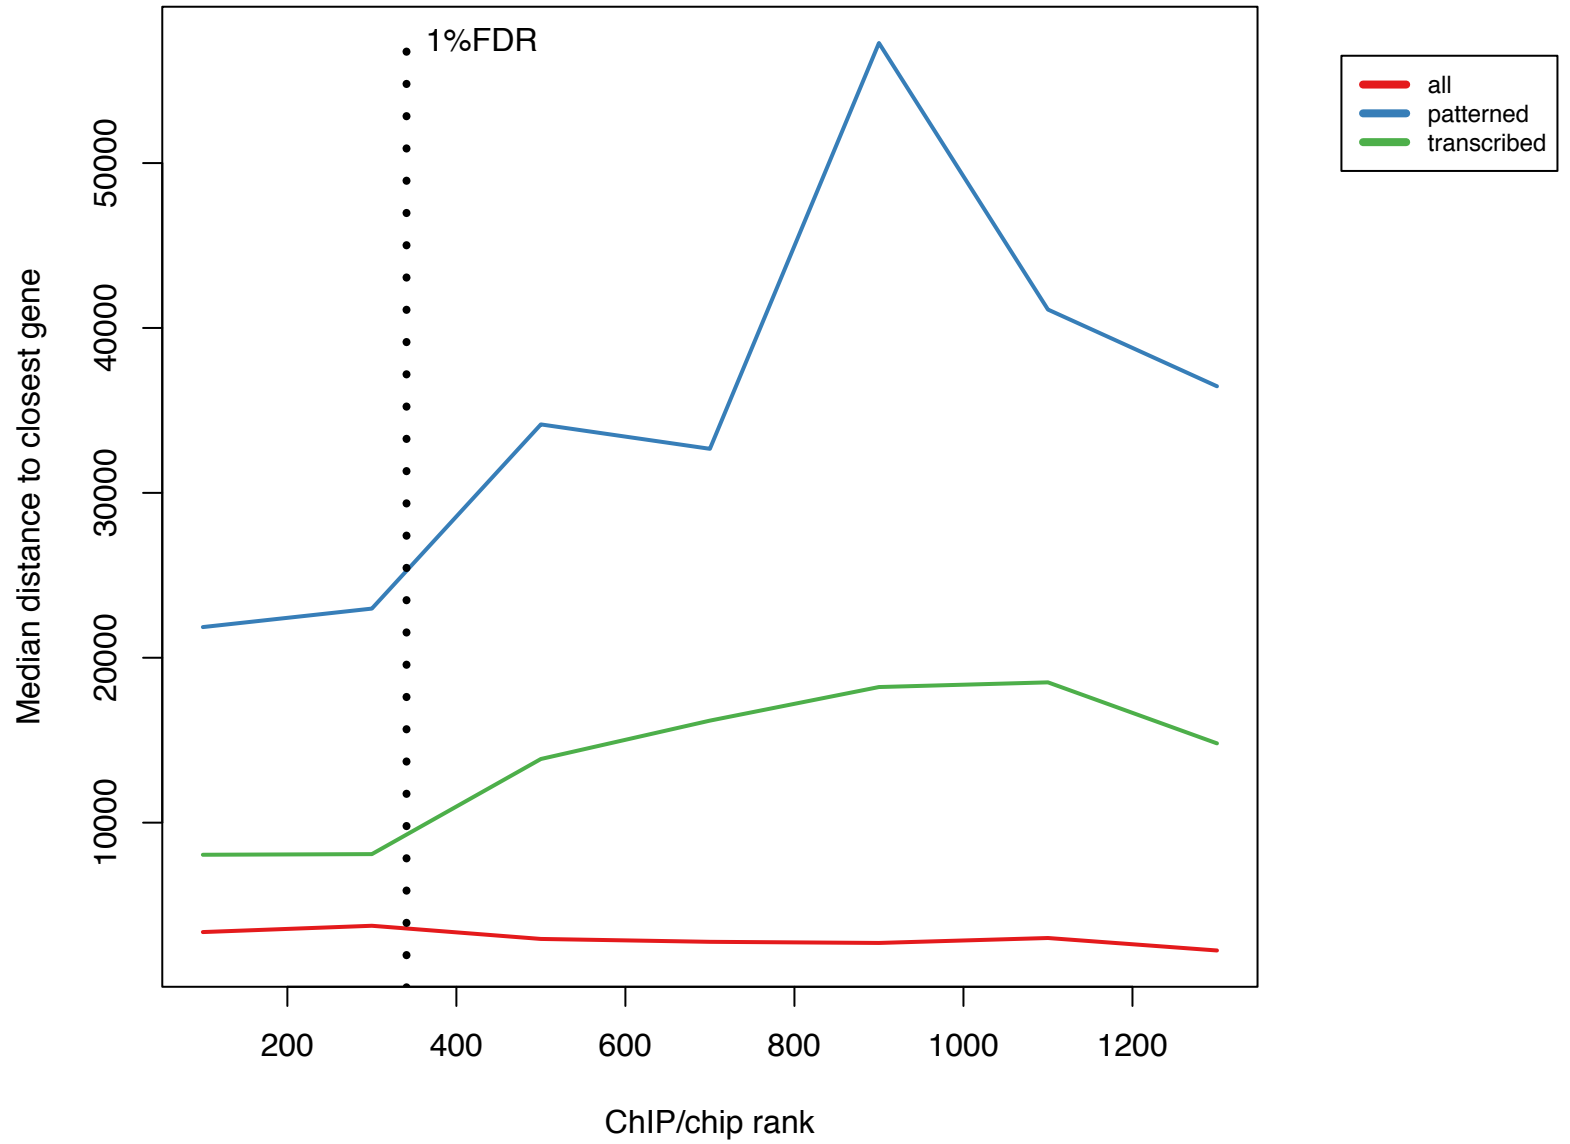

### SLP1 1 median distance to genes

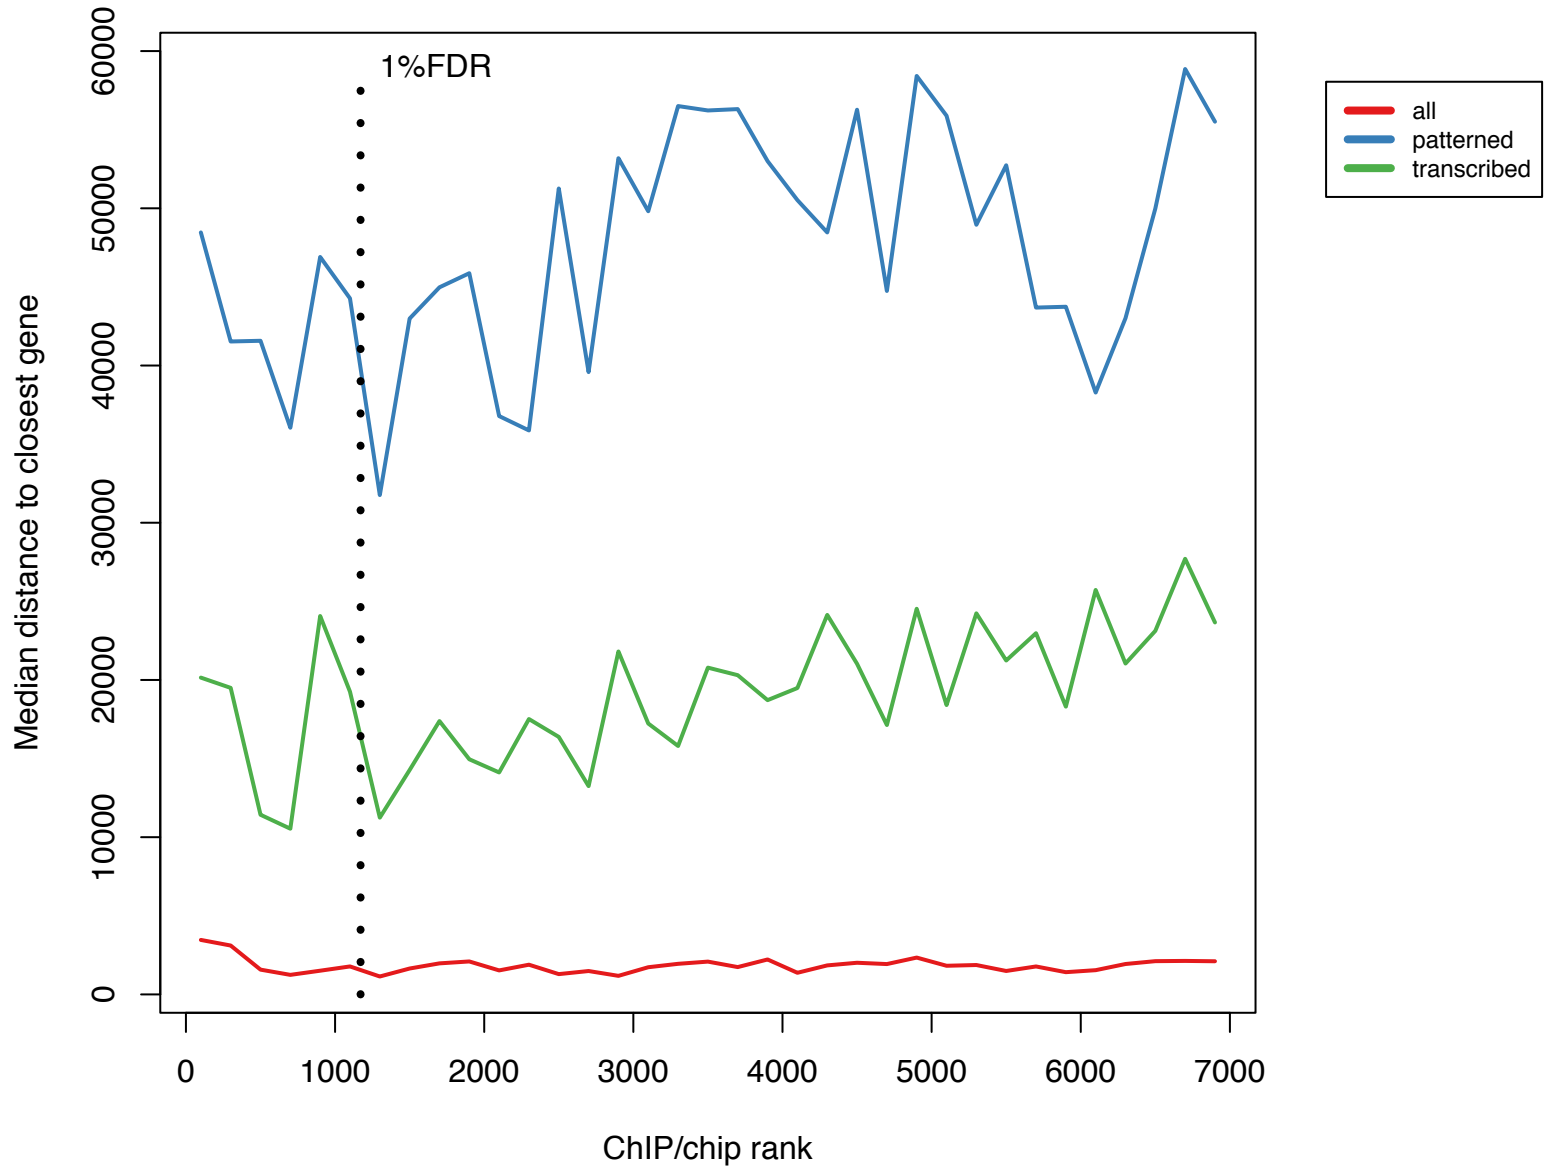

### SNA 2 median distance to genes

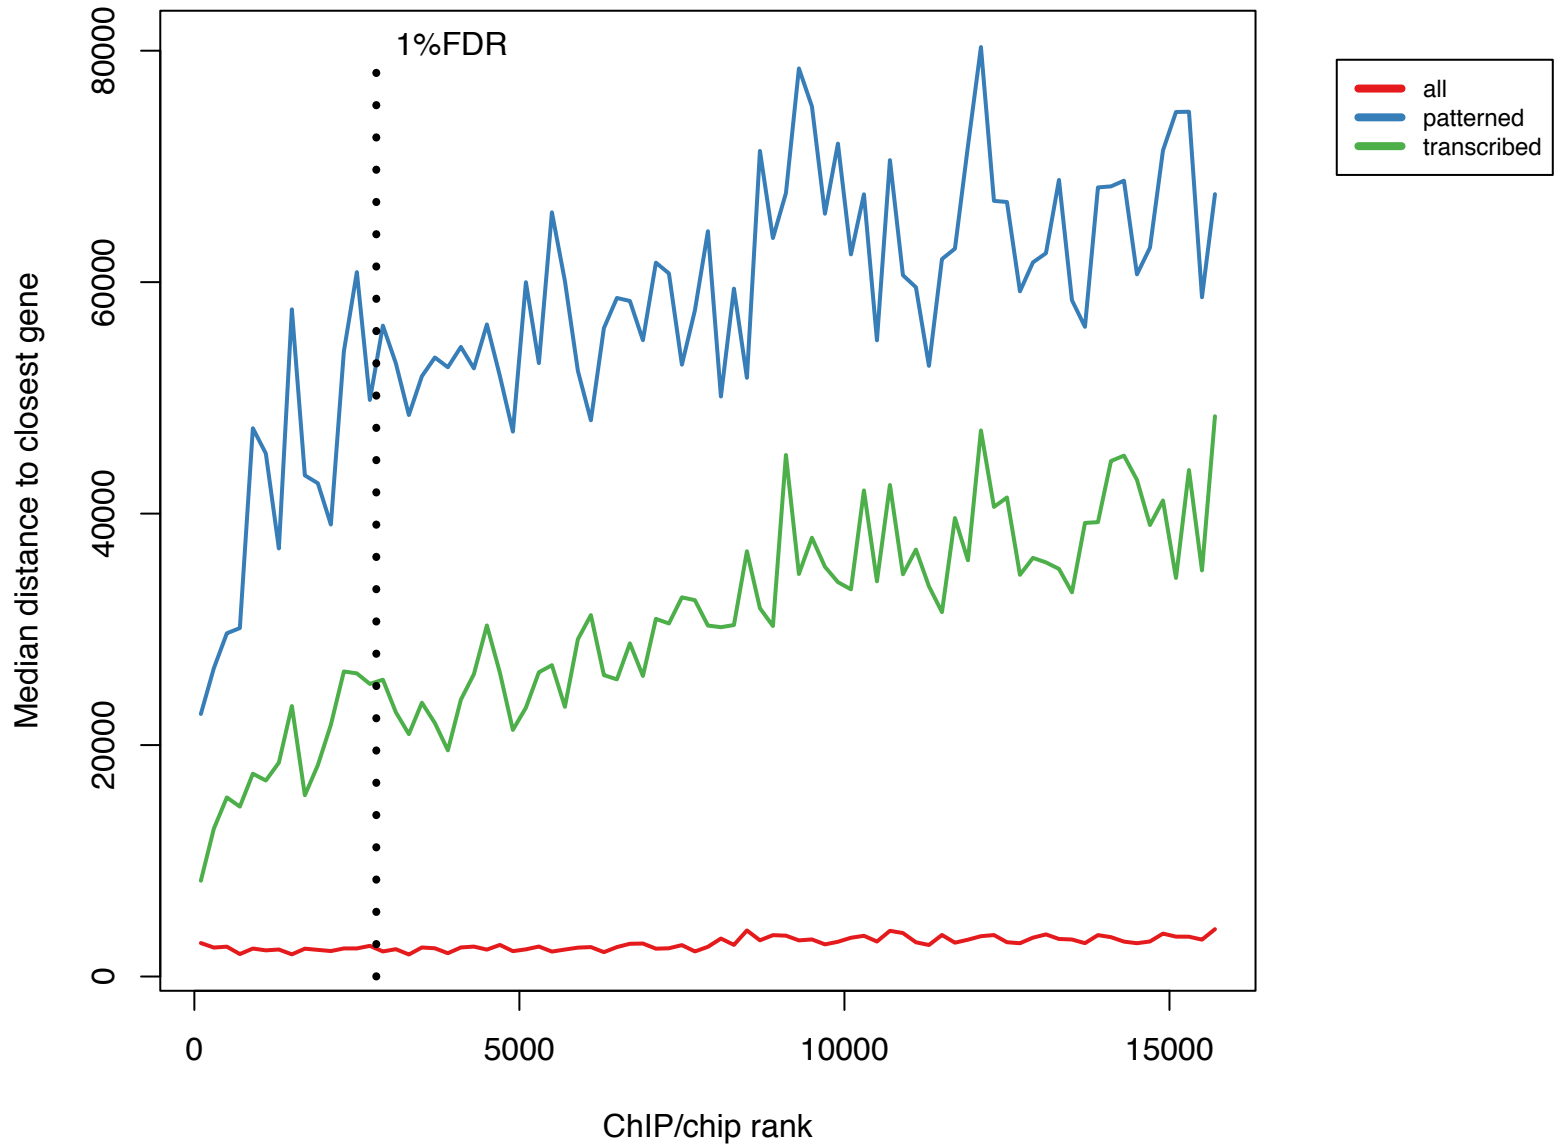

### TLL 1 median distance to genes

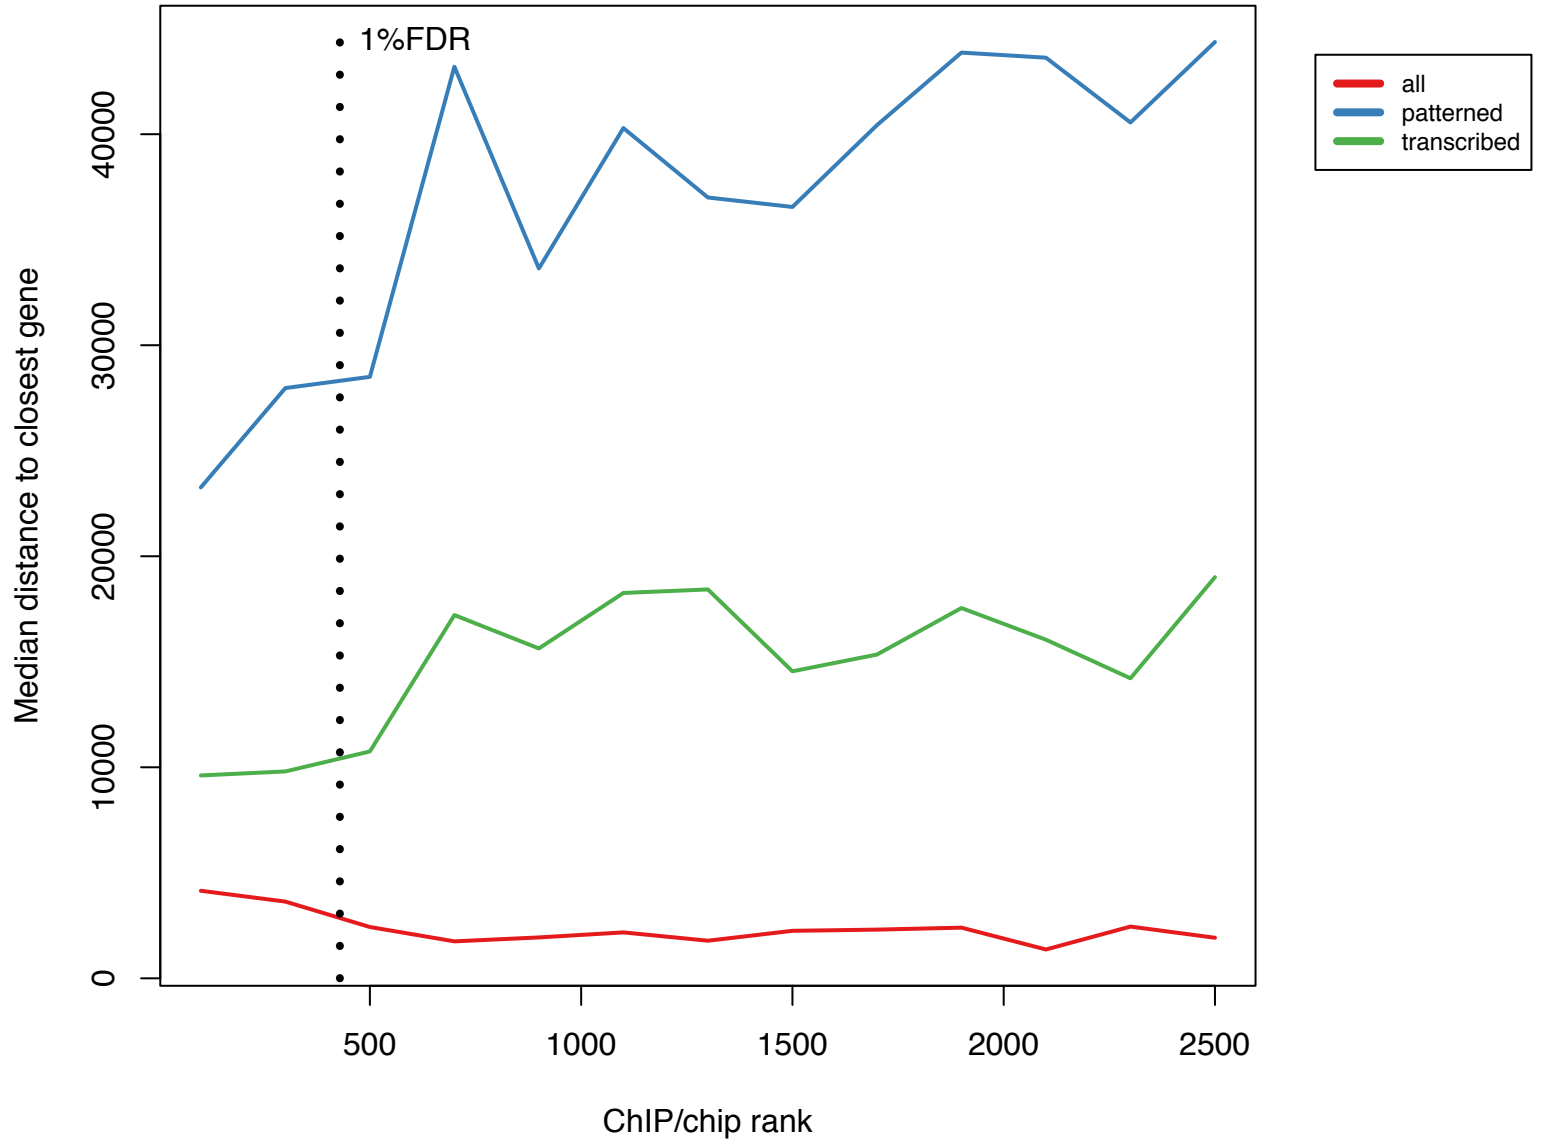

### TWI 2 median distance to genes

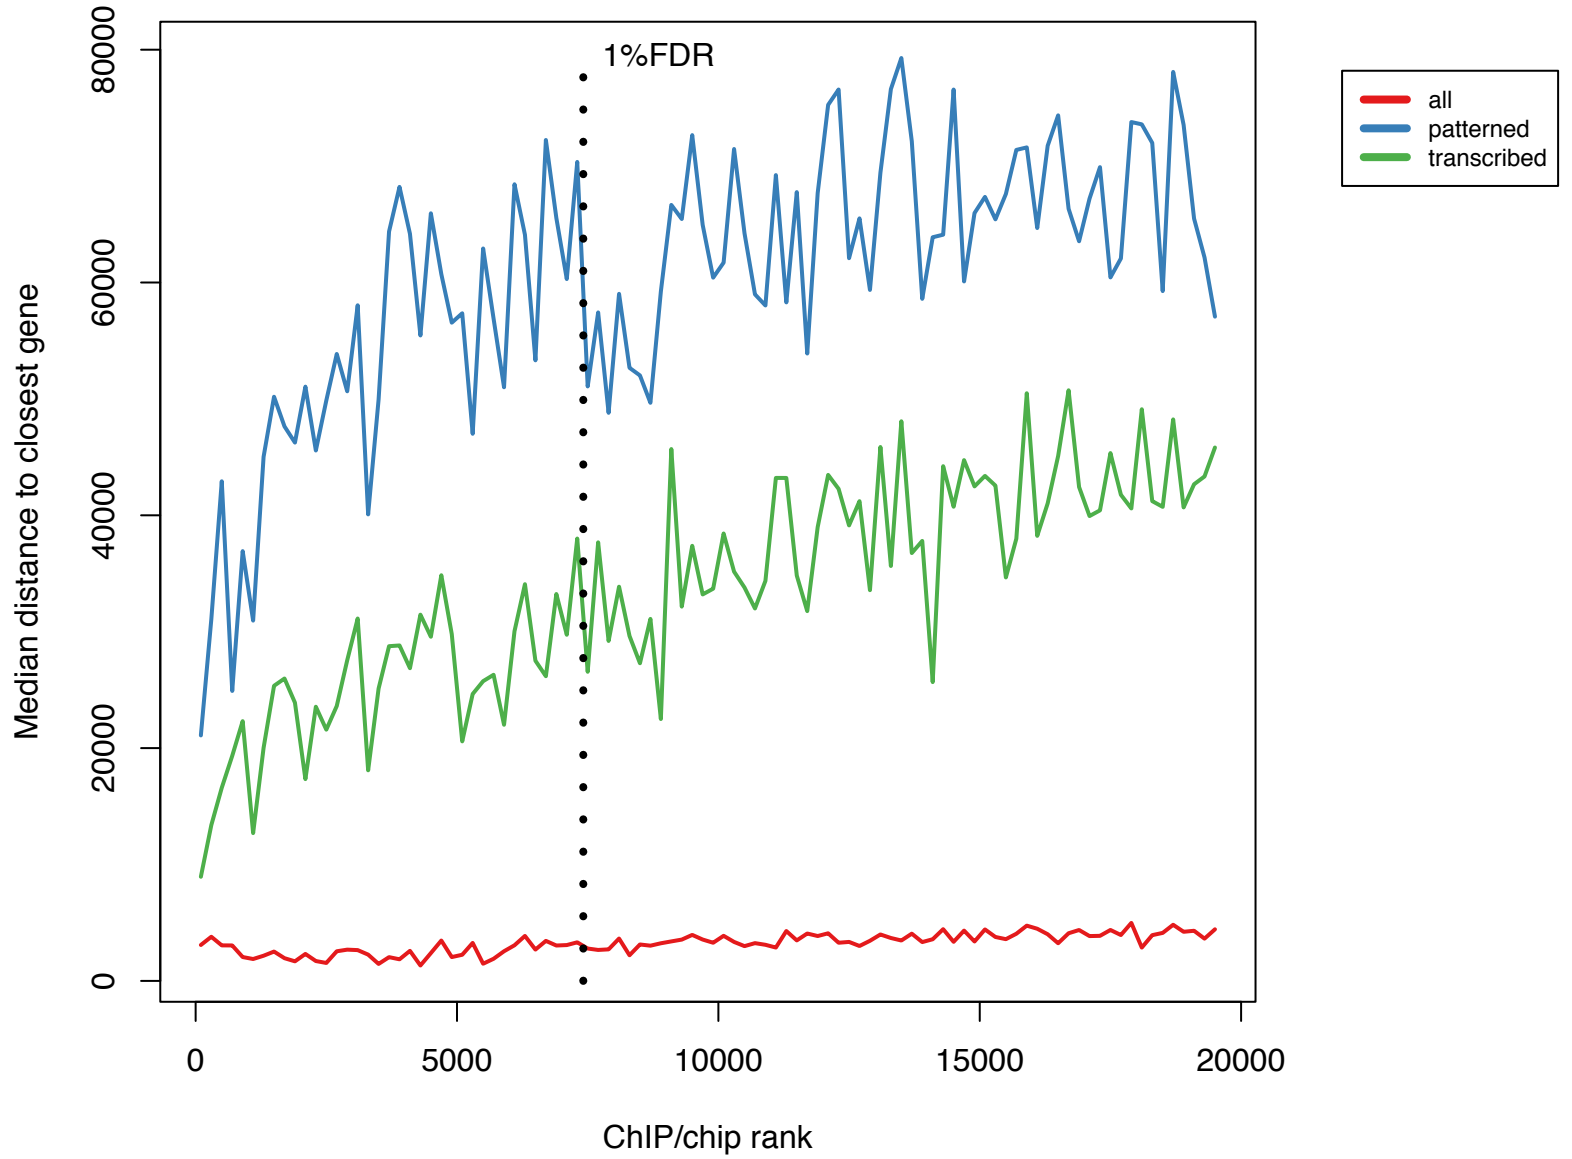

### TFIIB median distance to genes

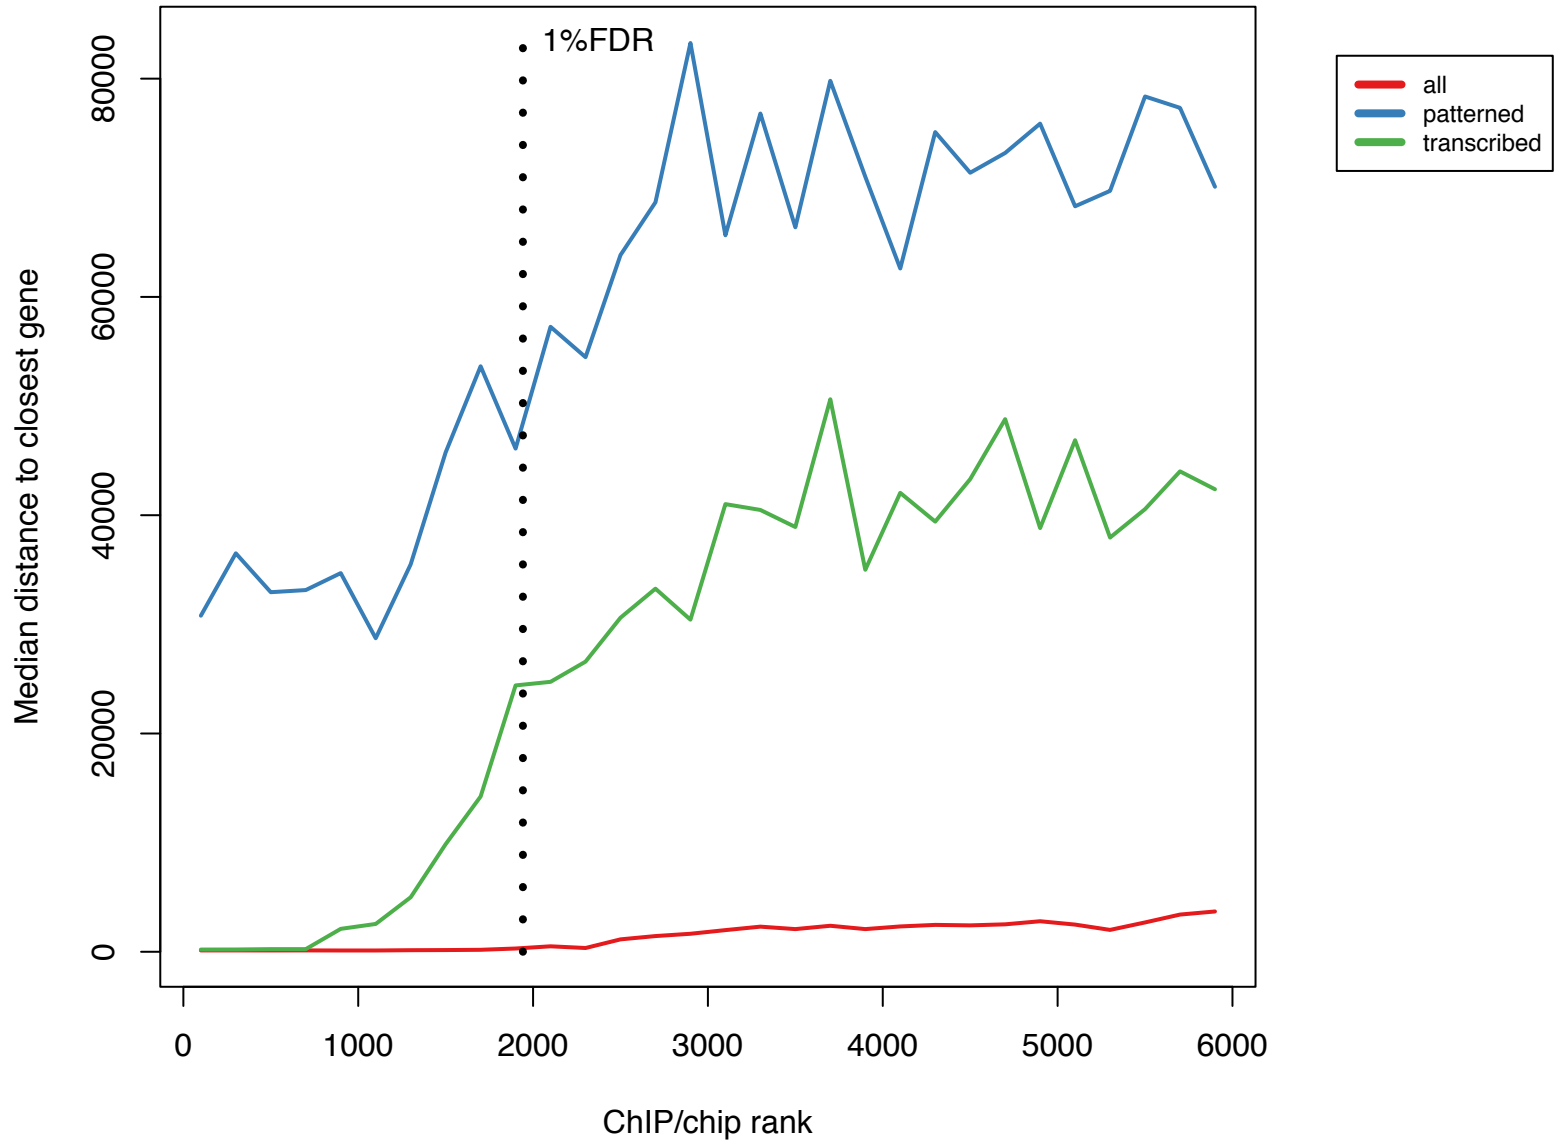

Supplement: 13059_2009_2230_MOESM10_ESM.pdf [file 13059_2009_2230_MOESM10_ESM.pdf]
