# Supplementary material for: Developmental roles of 21 Drosophila transcription factors are determined by quantitative differences in binding to an overlapping set of thousands of genomic regions
Source: Springer Nature journal article supplement (doi:10.1186/gb-2009-10-7-r80), 2009-07-23

### BCD 2 genomic location of peaks

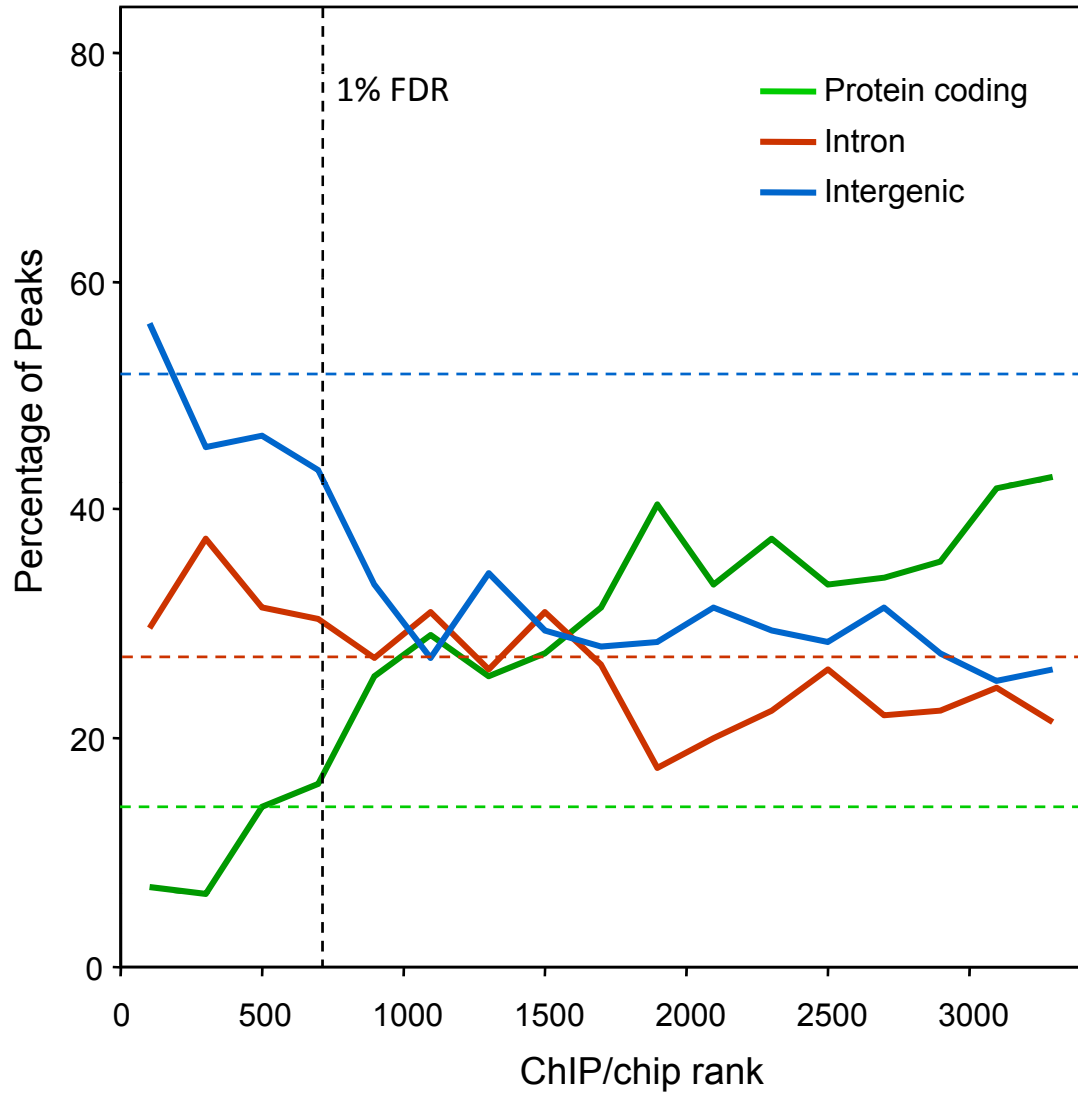

### CAD 1 genomic location of peaks

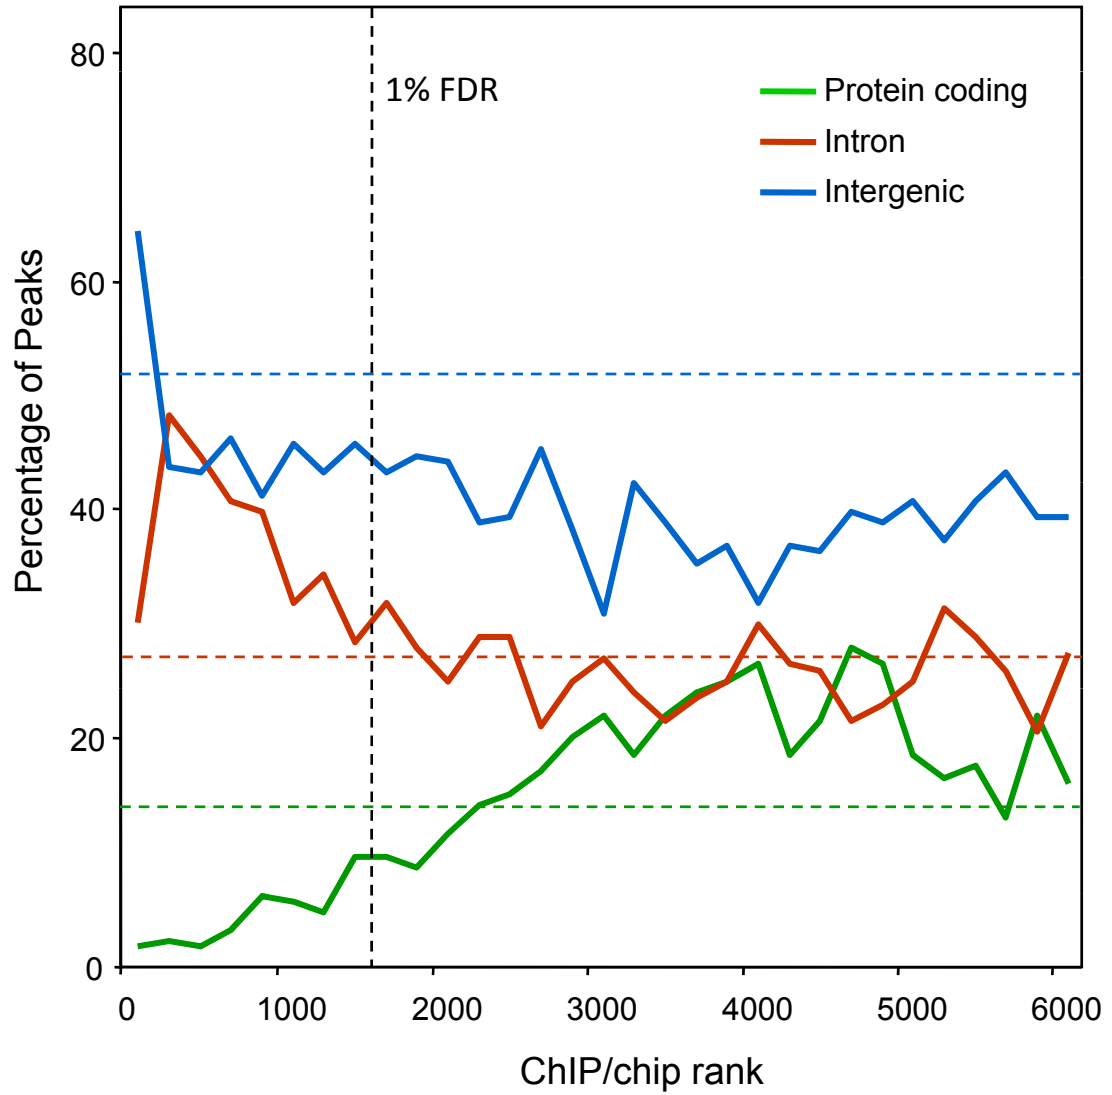

### D 1 genomic location of peaks

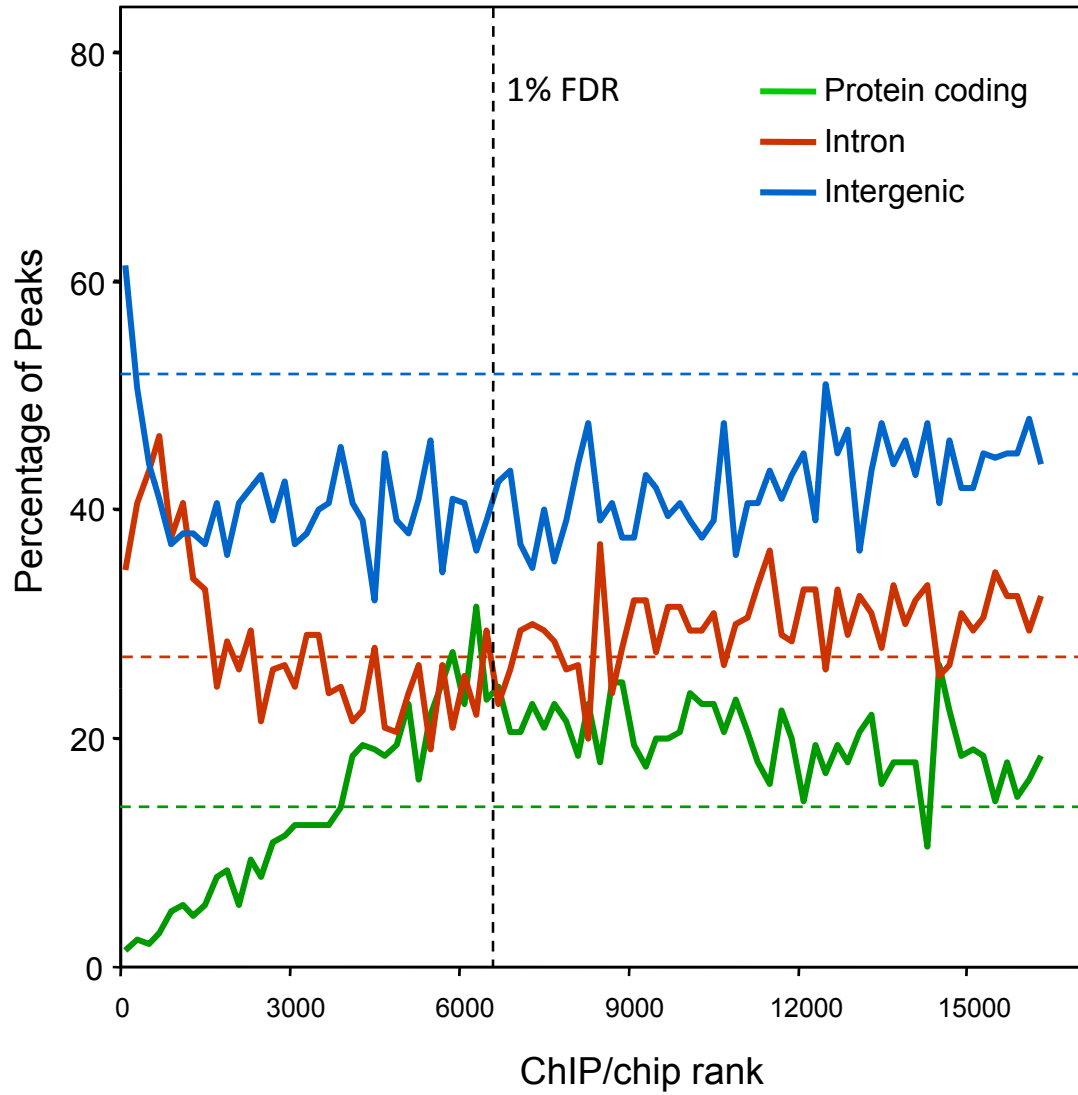

### DA 2 genomic location of peaks

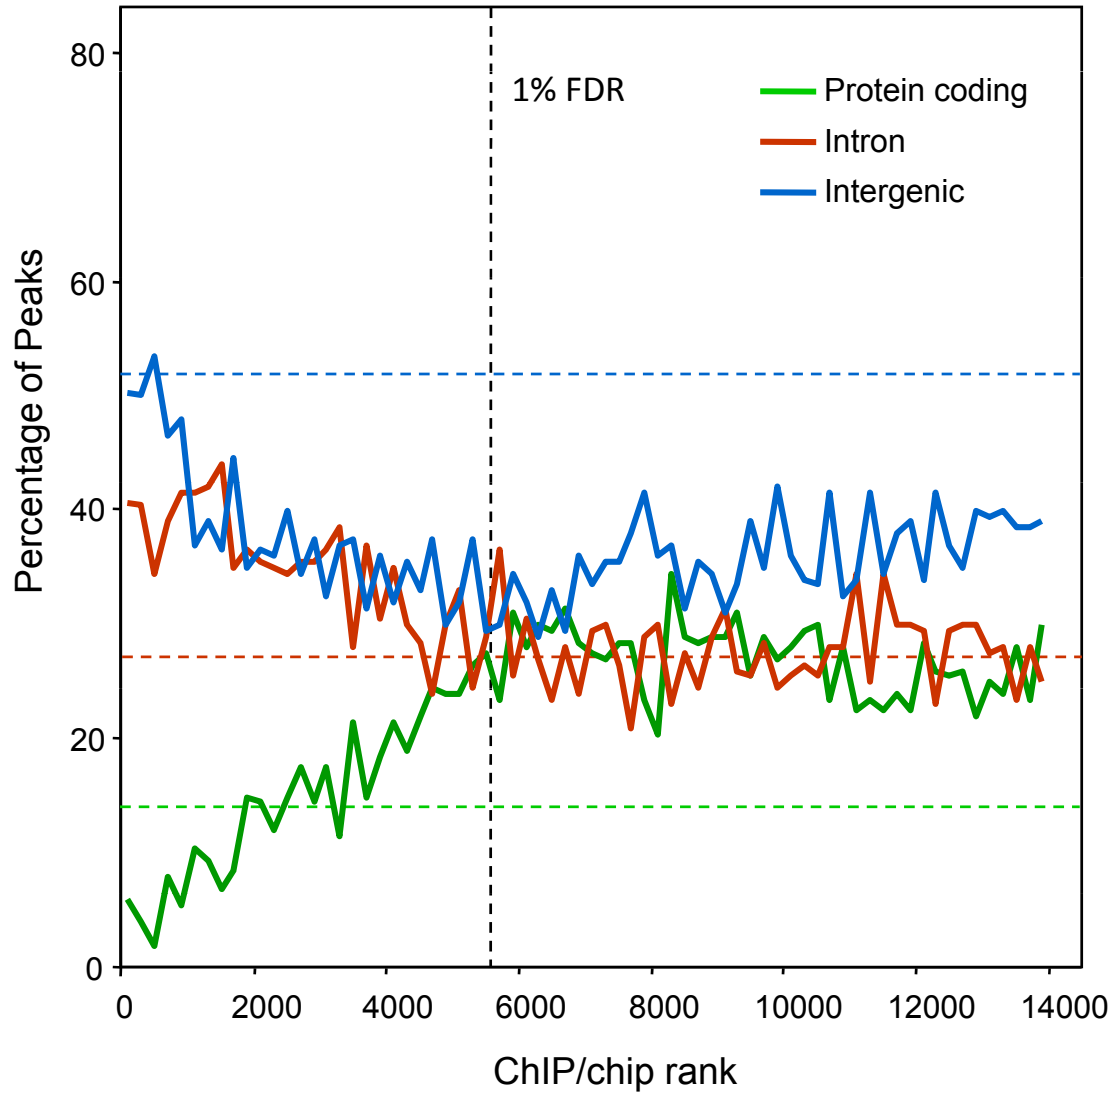

### DL 3 genomic location of peaks

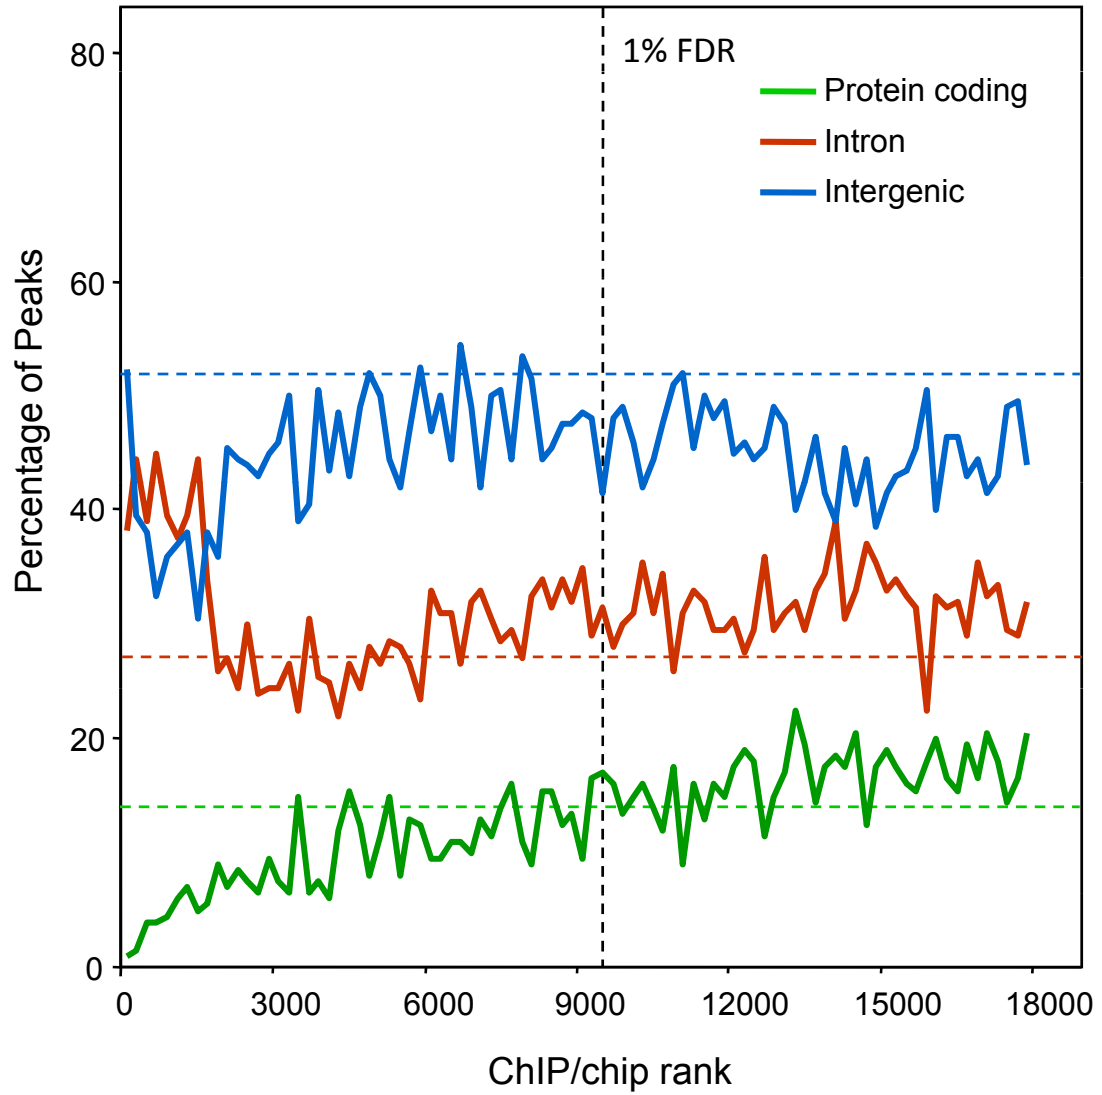

### FTZ 3 genomic location of peaks

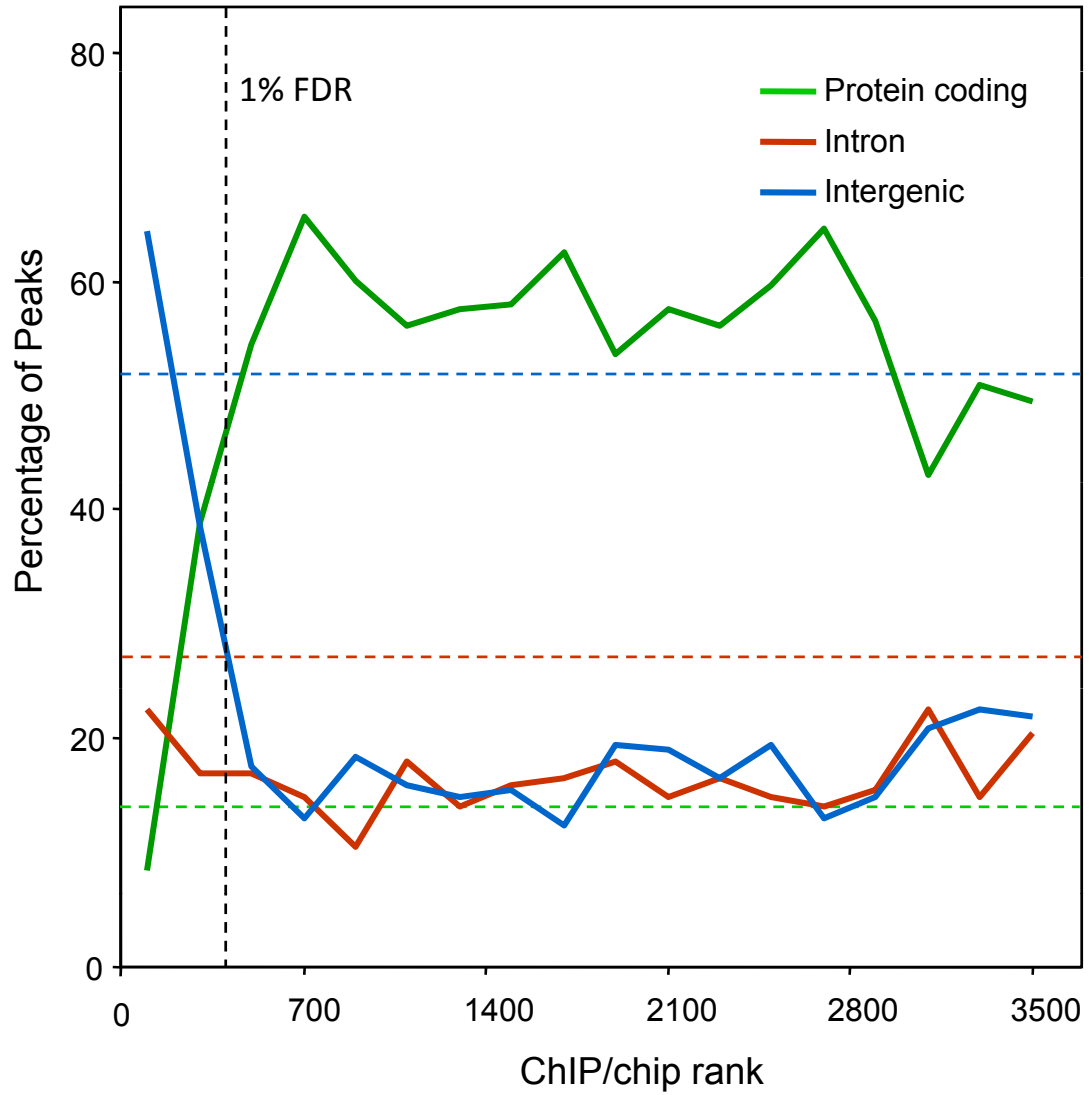

### GT 2 genomic location of peaks

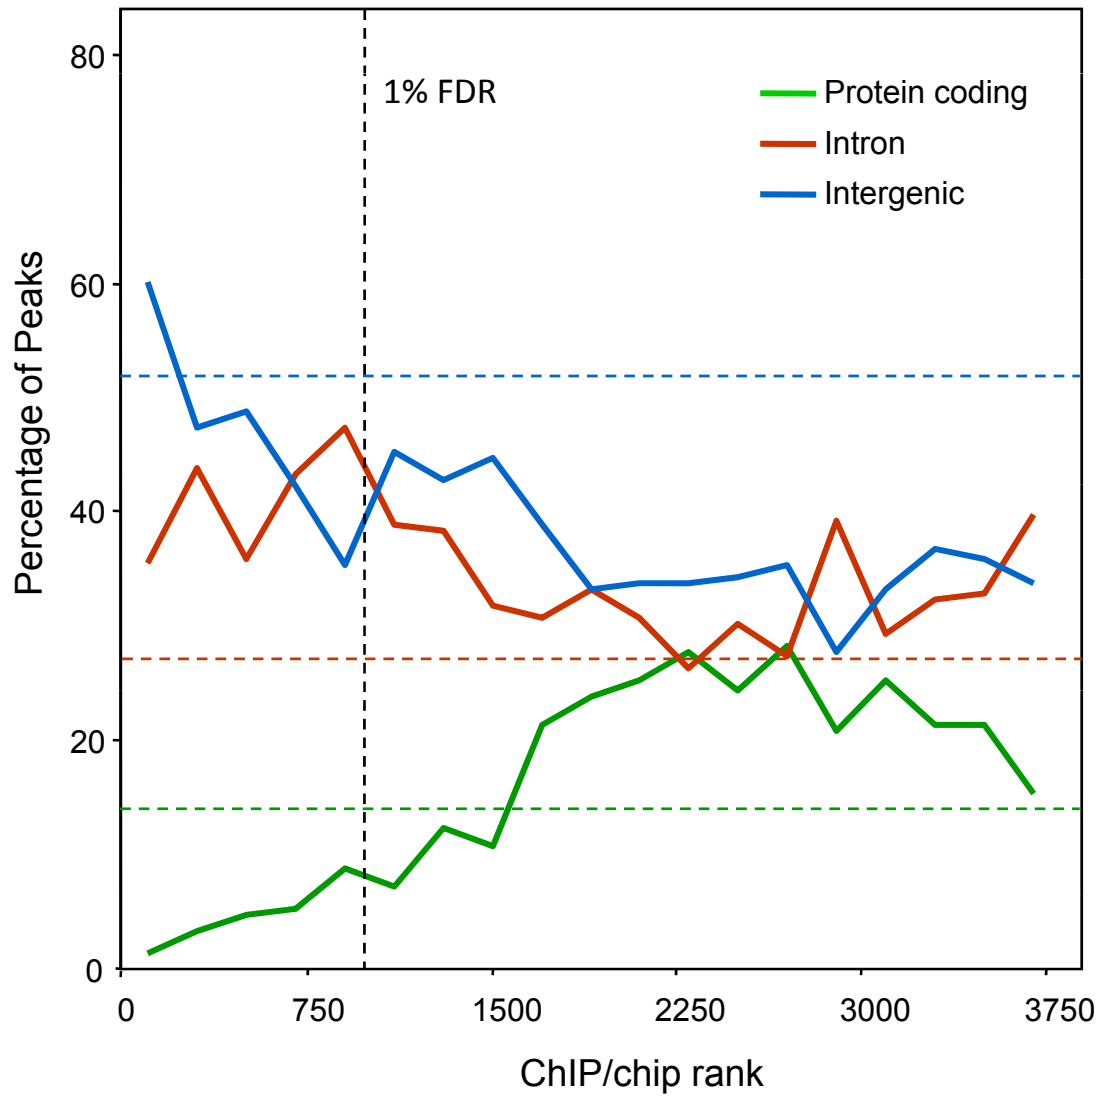

### HB 1 genomic location of peaks

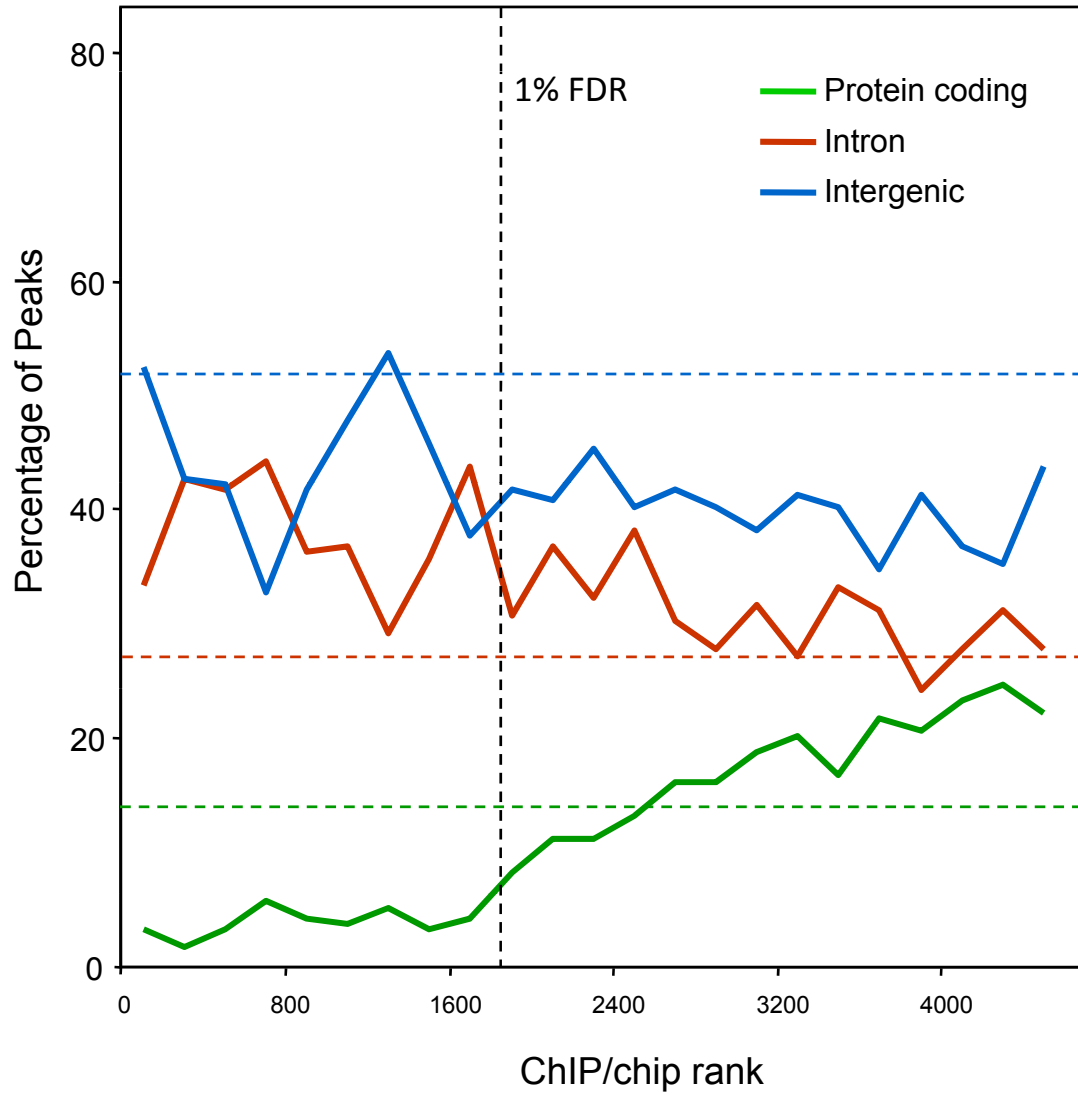



### HKB 1 genomic location of peaks

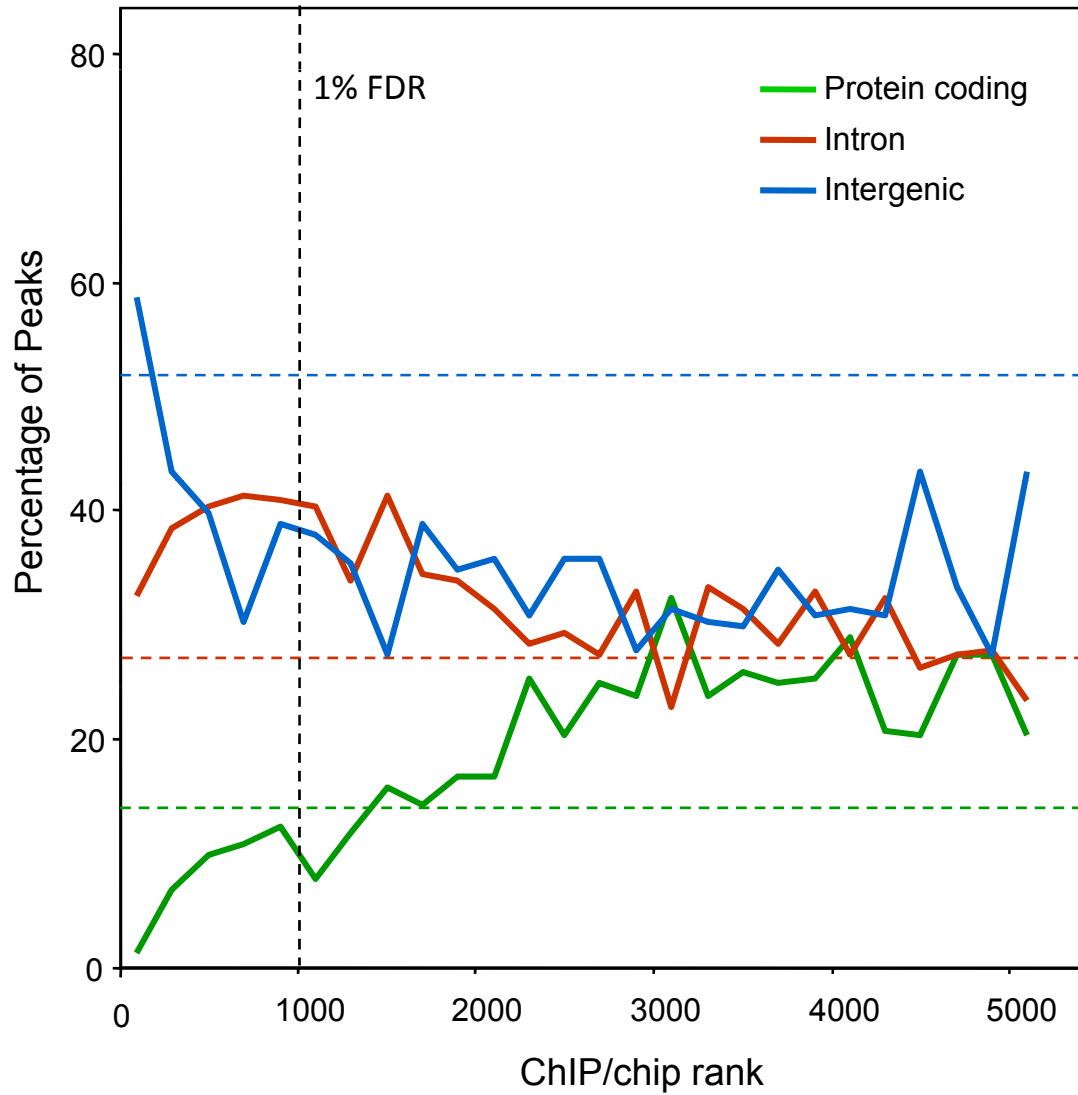

### HRV 2 genomic location of peaks

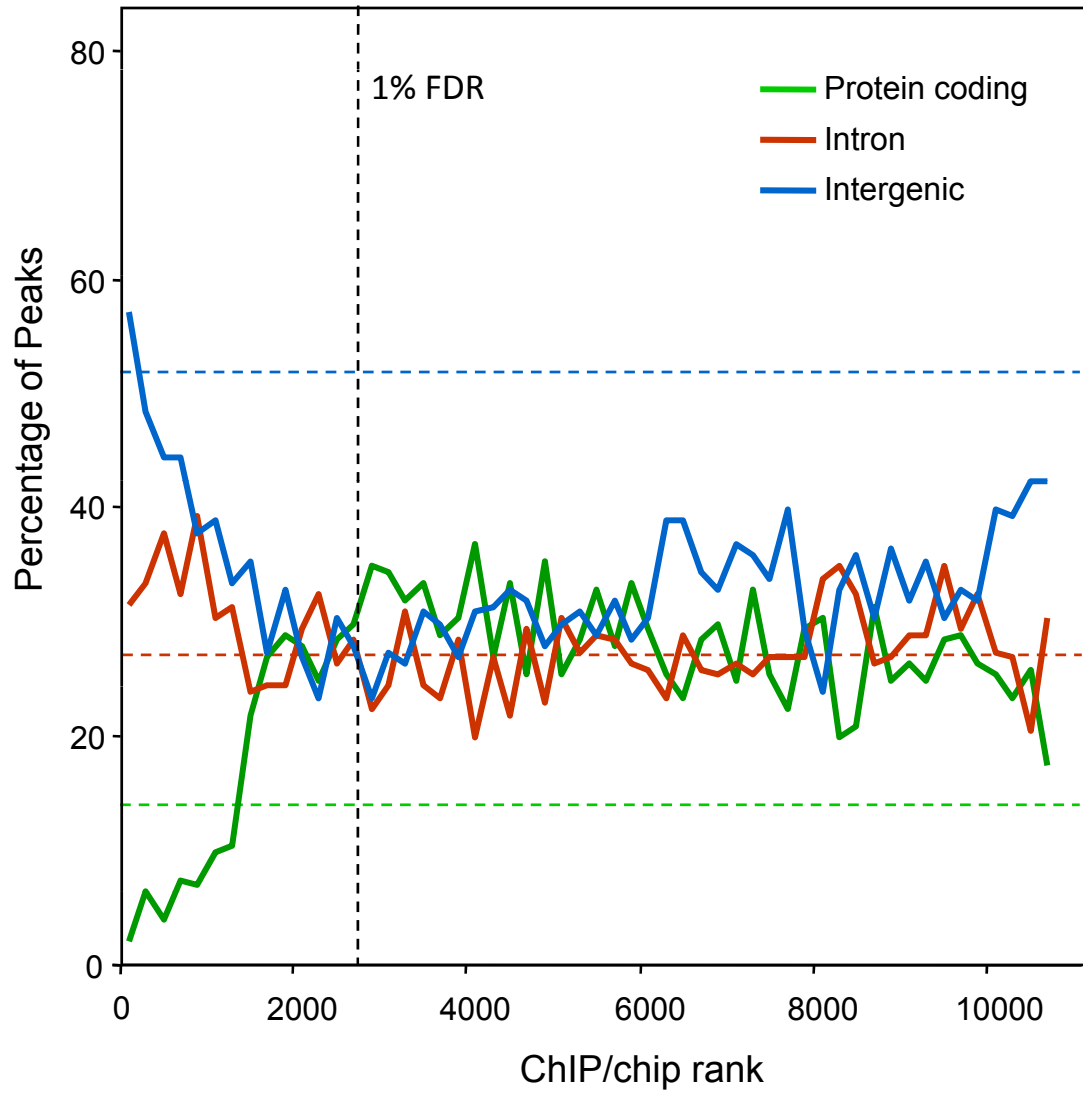

### KNI 2 genomic location of peaks

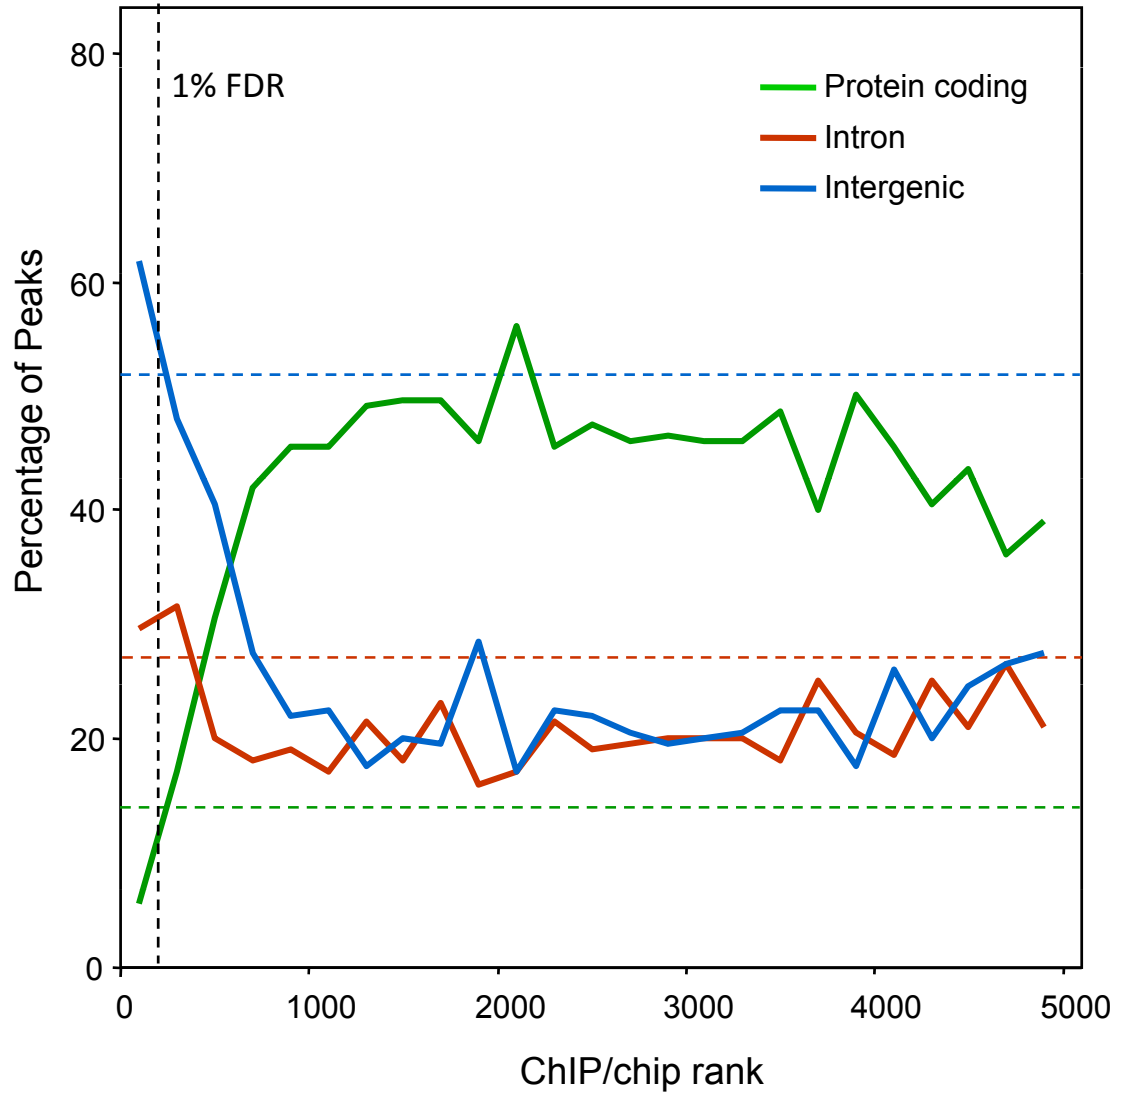

### KR 2 genomic location of peaks

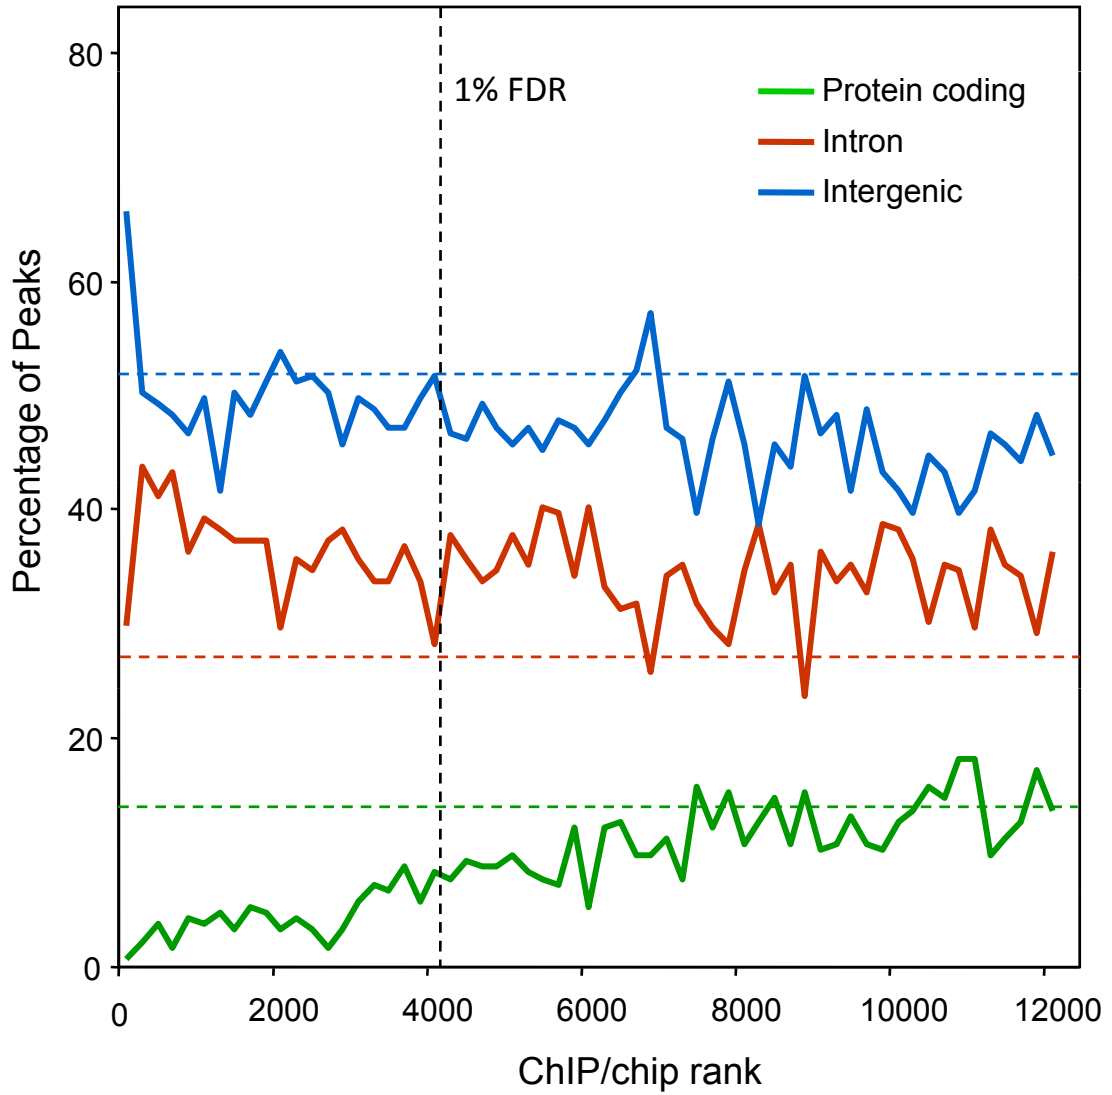

### MAD 2 genomic location of peaks

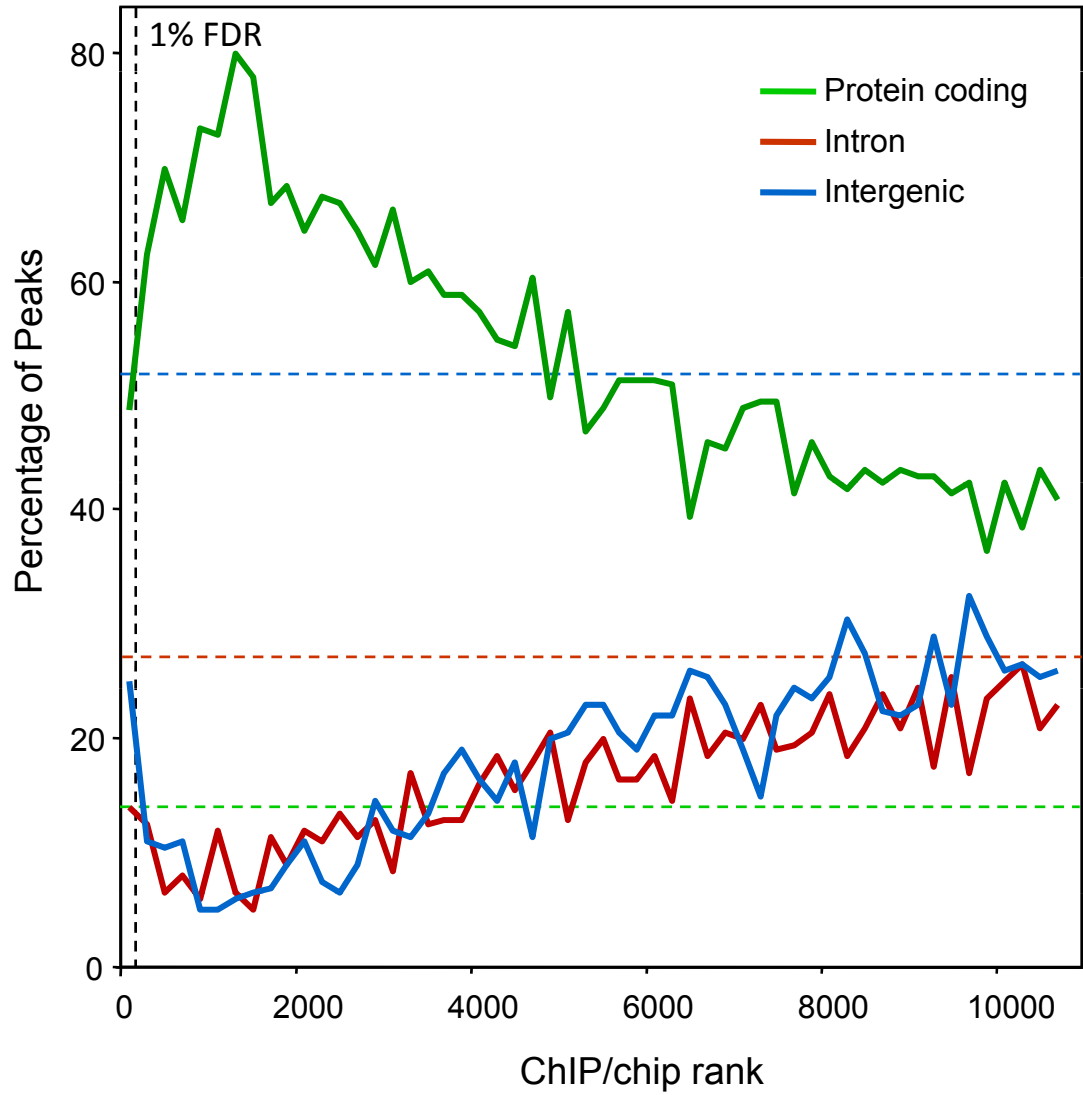

### MED 2 genomic location of peaks

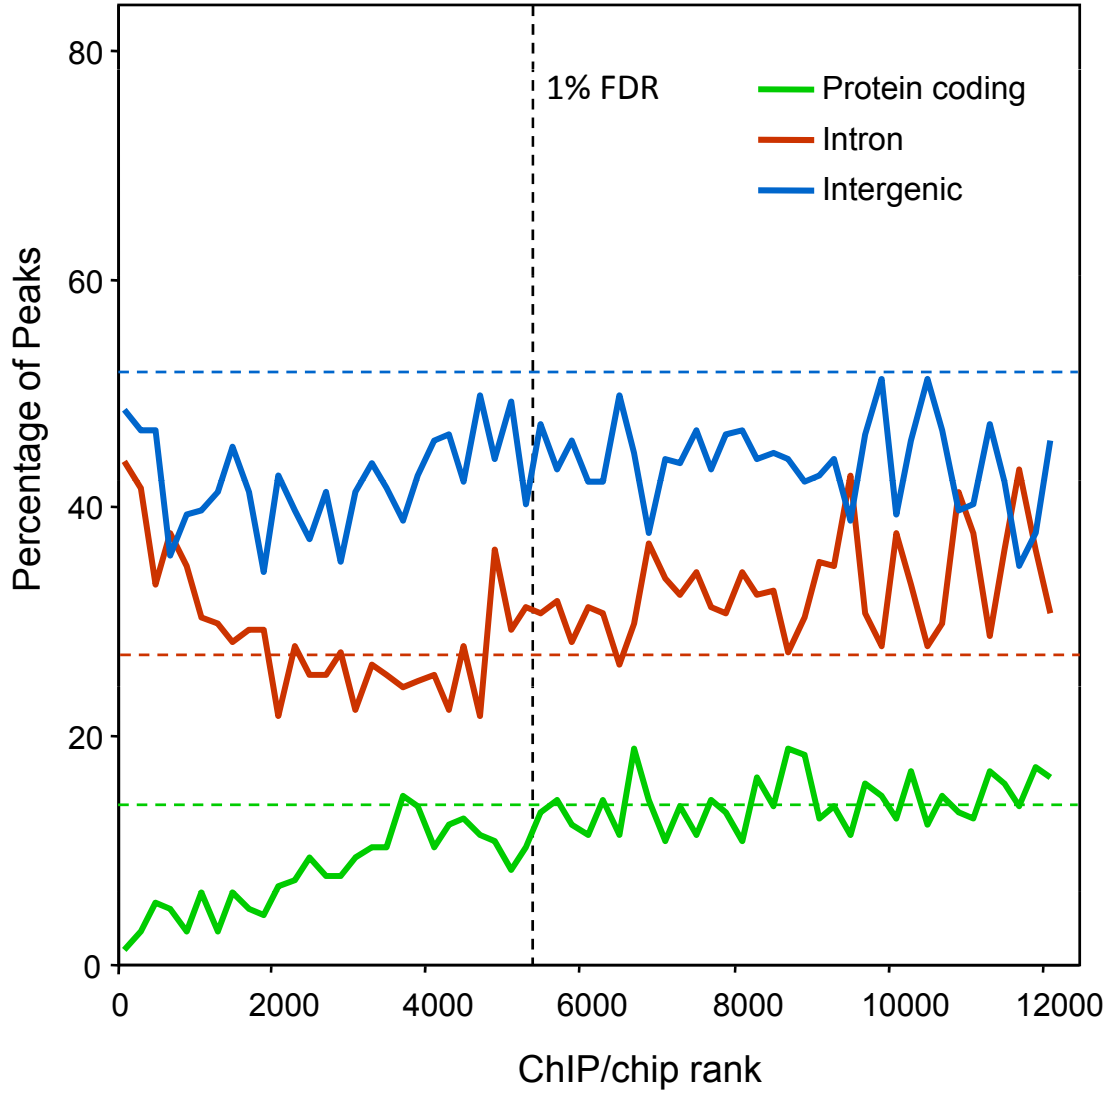

### PRD 1 genomic location of peaks

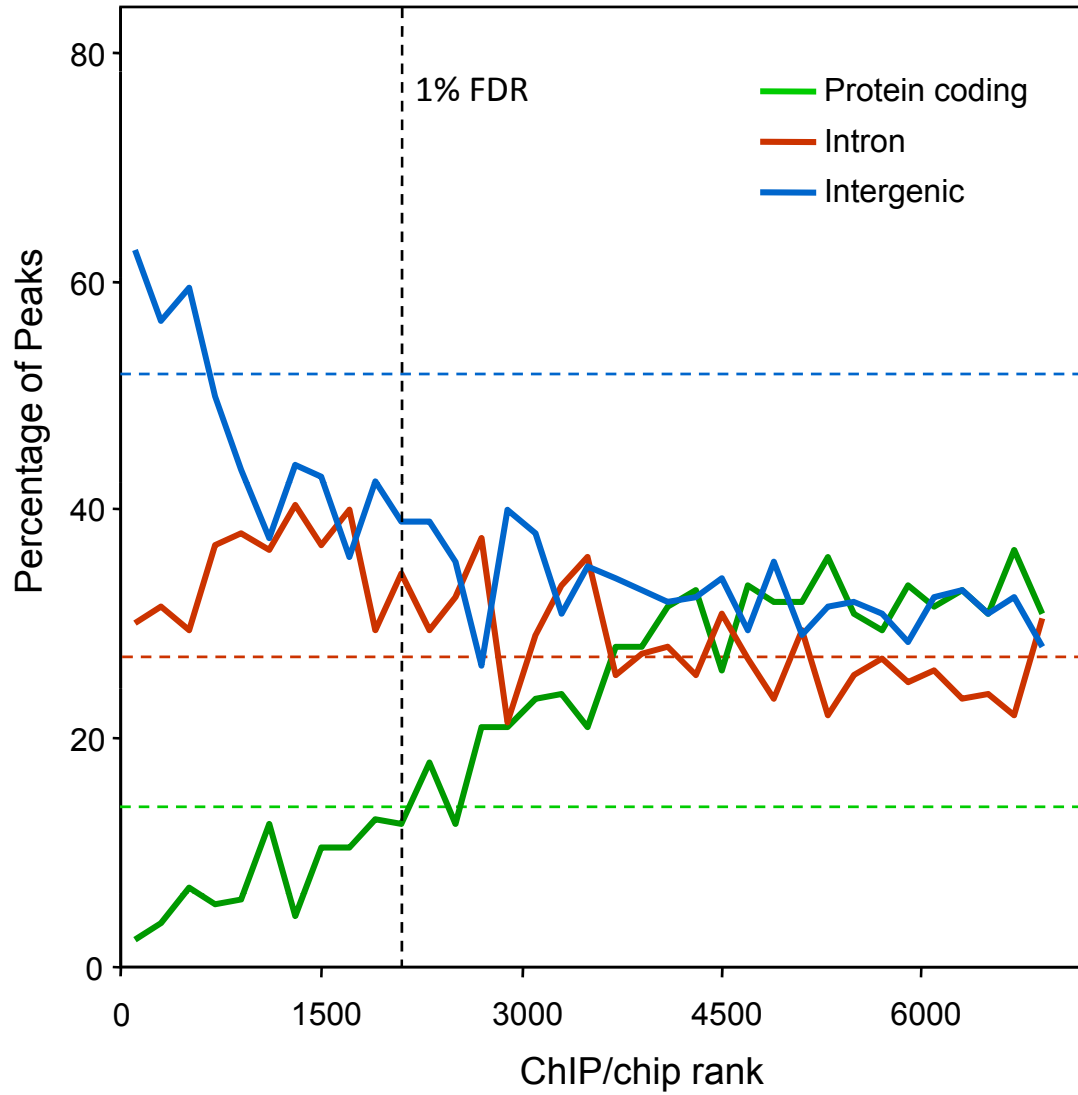

### RUN 1 genomic location of peaks

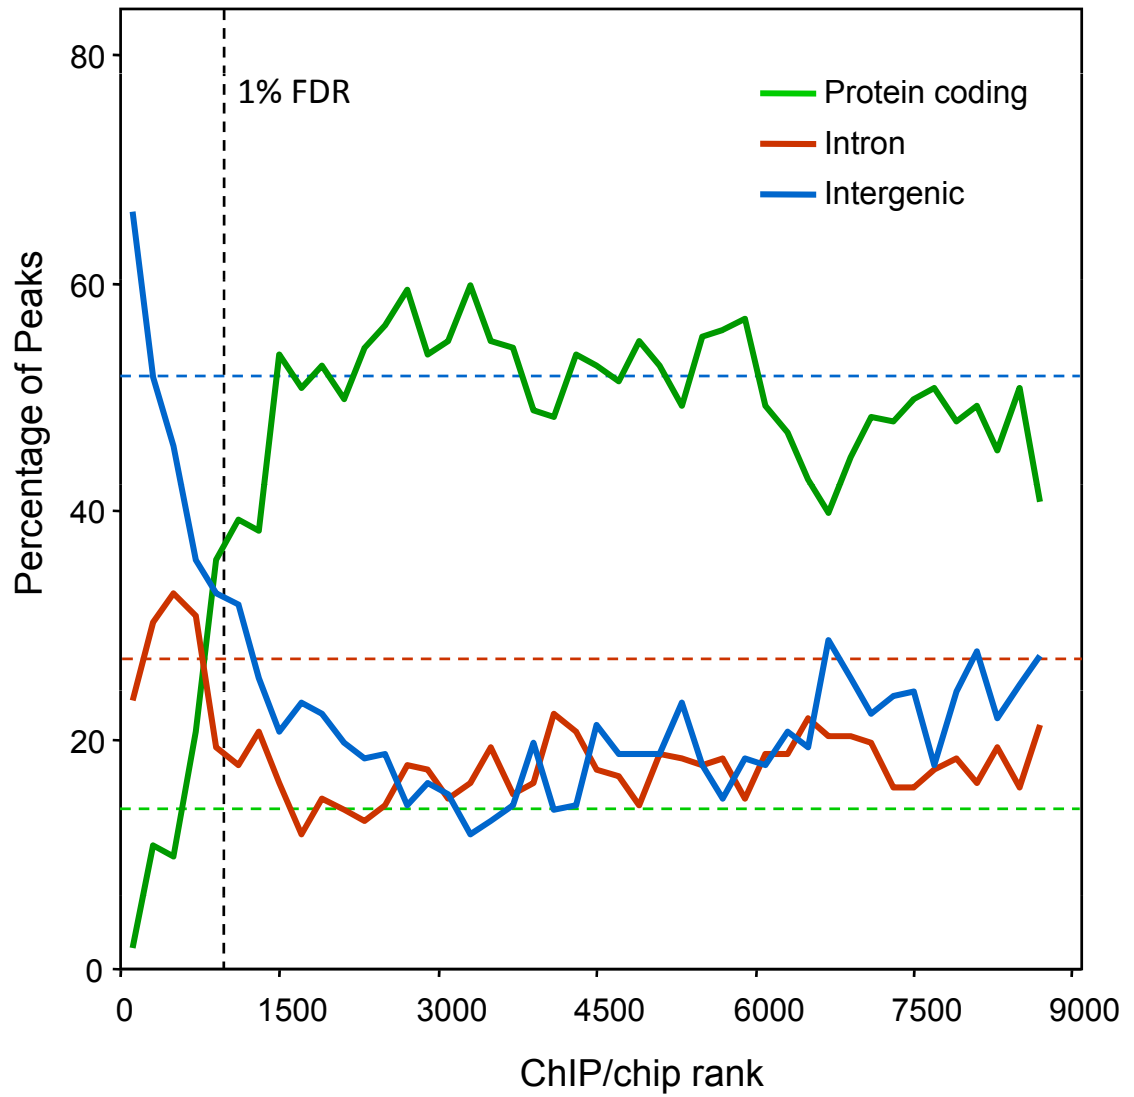



### SHN 2 genomic location of peaks

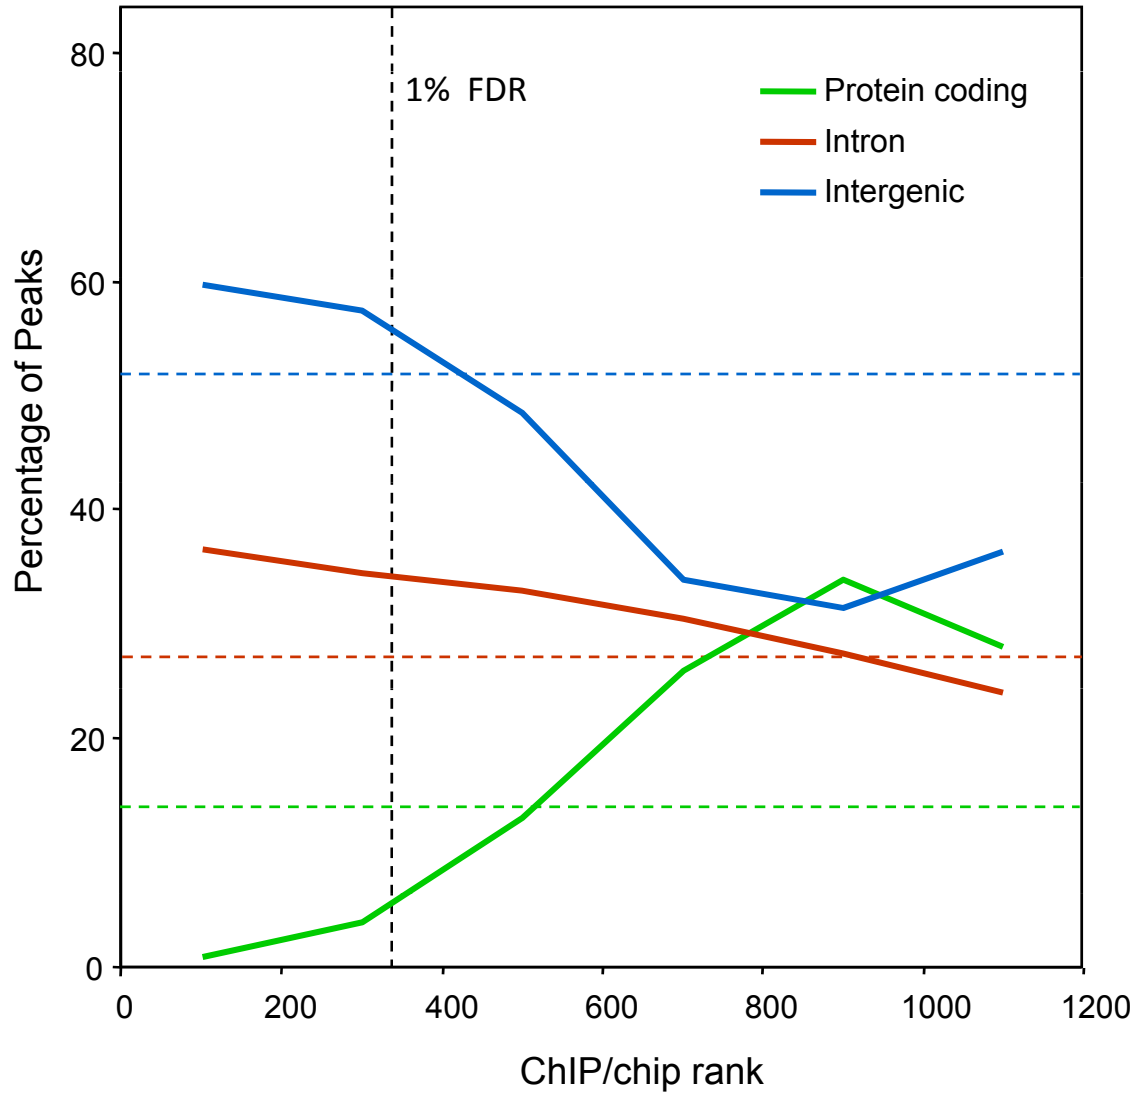

### SLP1 1 genomic location of peaks

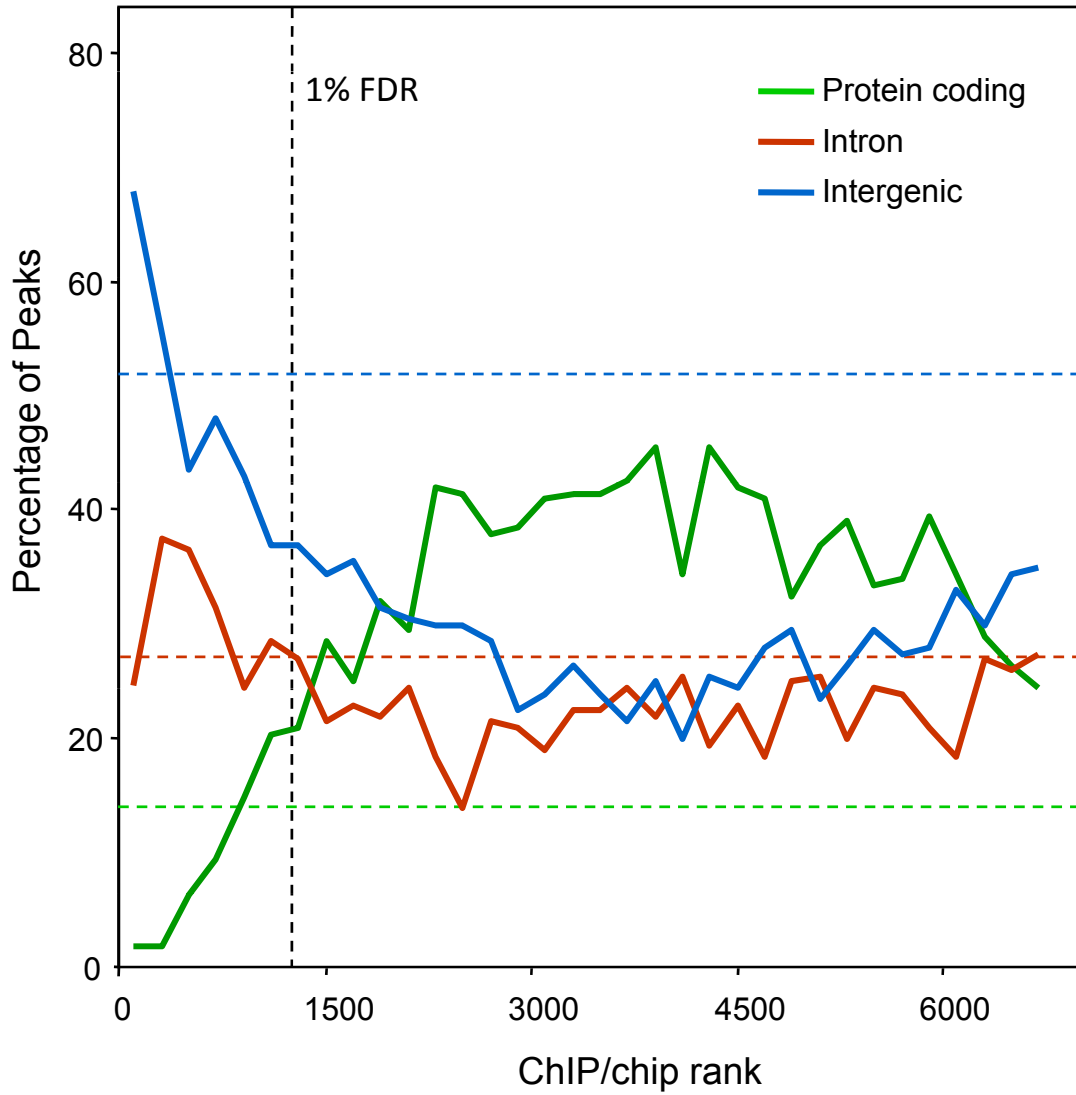

### SNA 2 genomic location of peaks

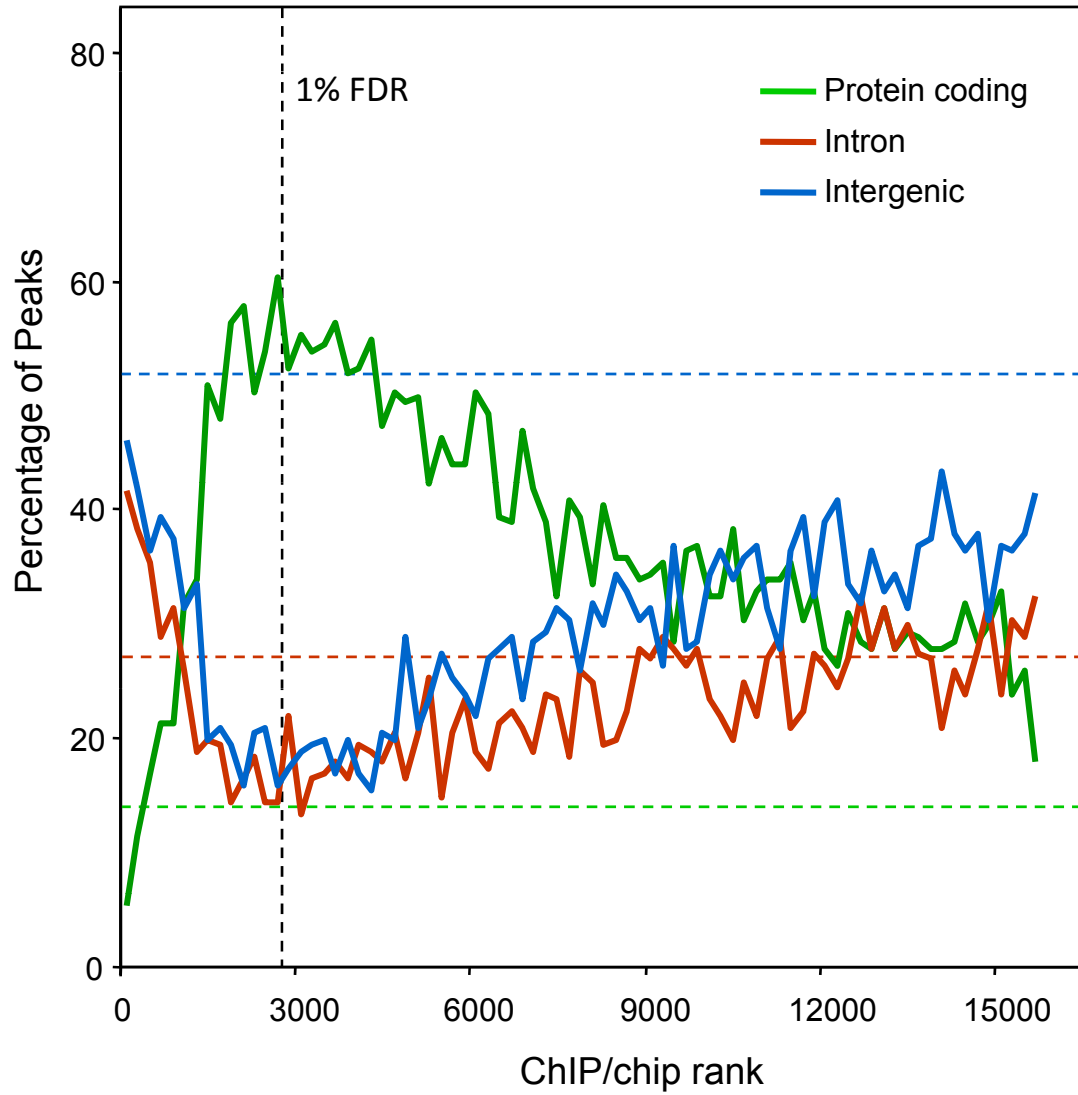

### TLL 1 genomic location of peaks

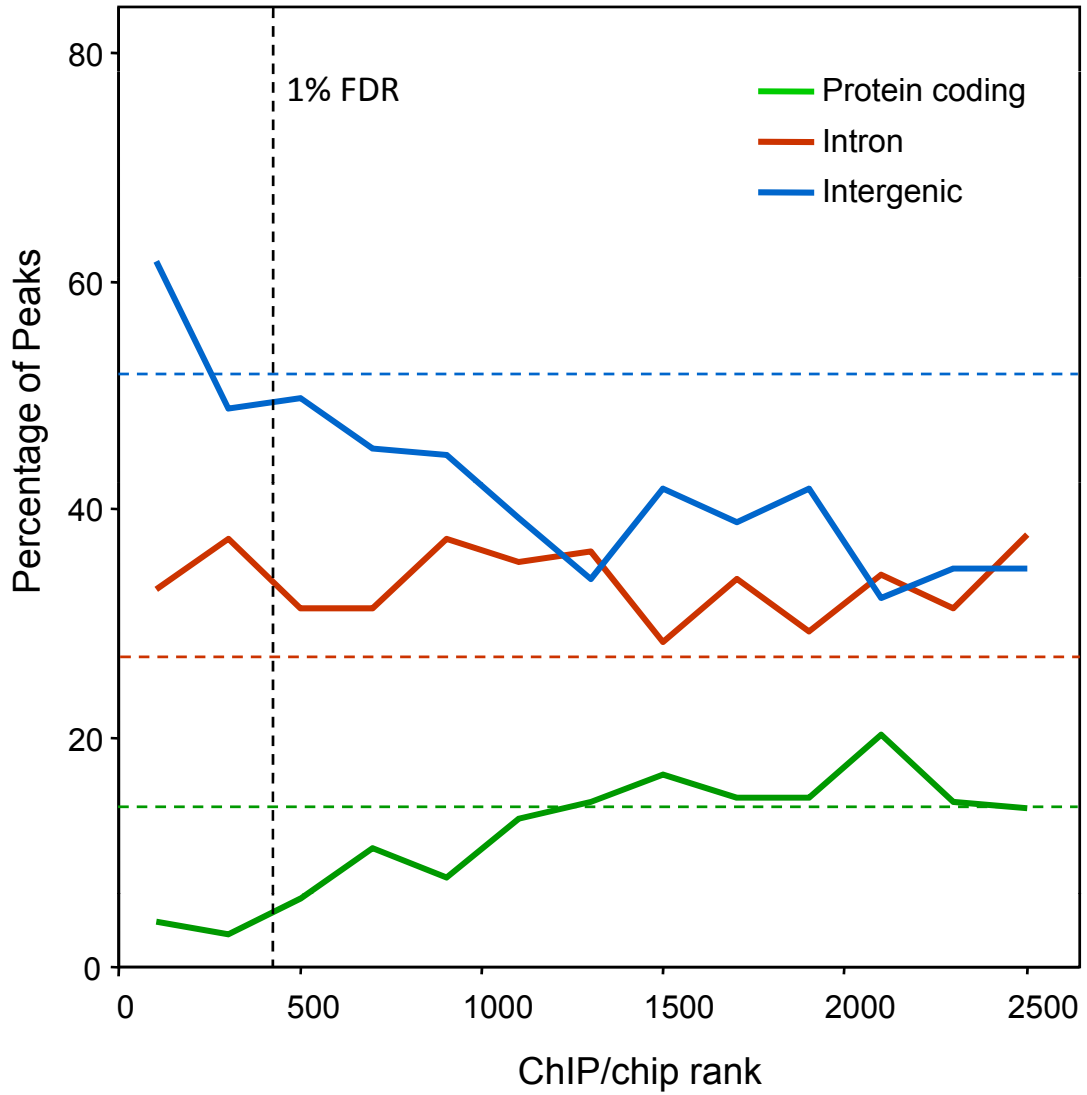

### TWI 2 genomic location of peaks

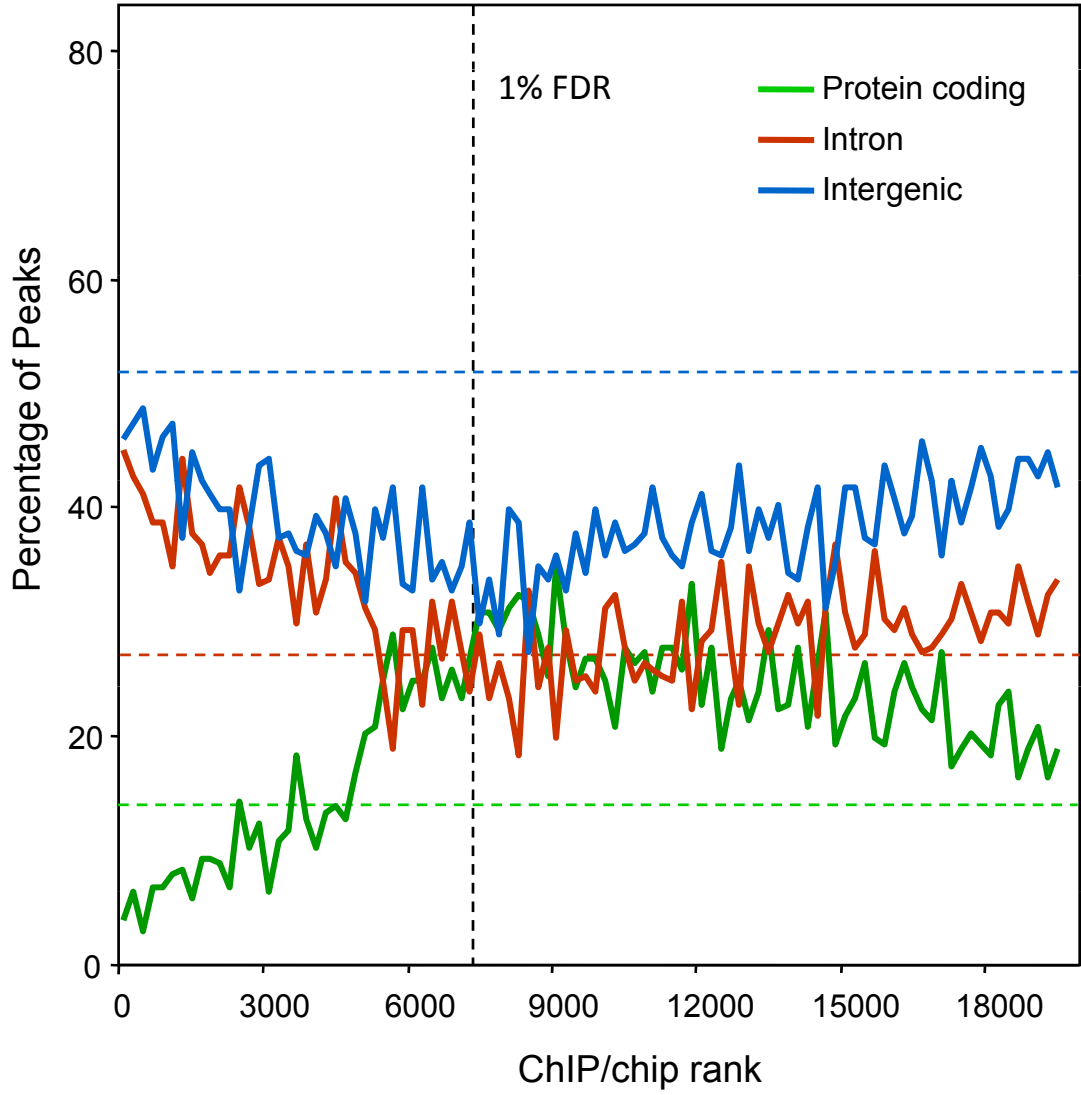

Supplement: 13059_2009_2230_MOESM11_ESM.pdf [file 13059_2009_2230_MOESM11_ESM.pdf]
