# Supplementary material for: Developmental roles of 21 Drosophila transcription factors are determined by quantitative differences in binding to an overlapping set of thousands of genomic regions
Source: Springer Nature journal article supplement (doi:10.1186/gb-2009-10-7-r80), 2009-07-23

### bcd\_2 mean PhastCons down ranks

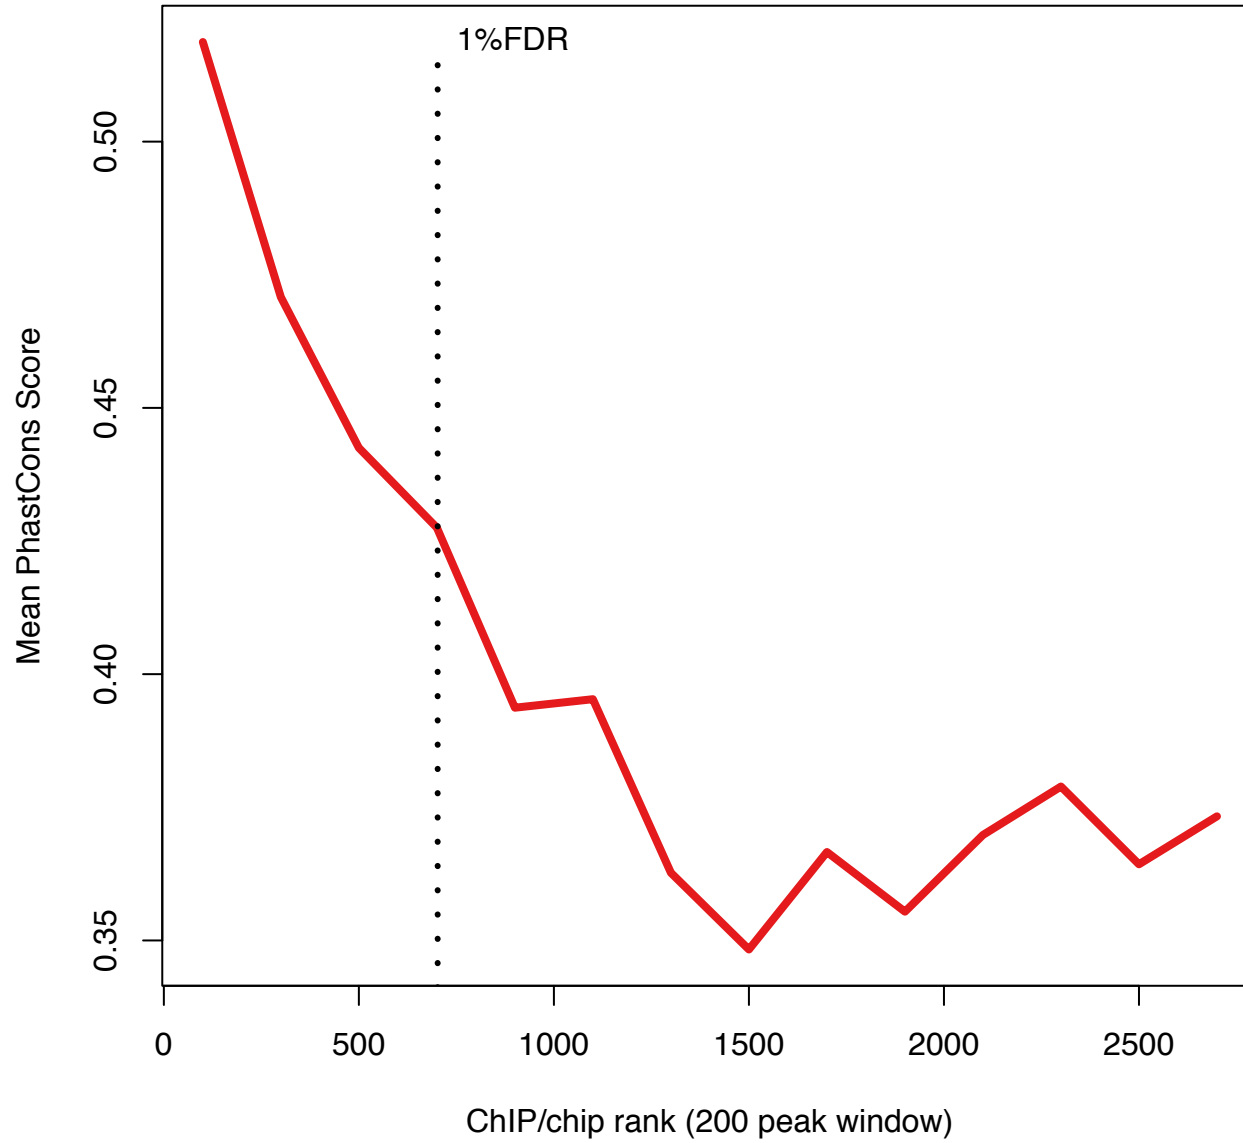

### cad\_1 mean PhastCons down ranks

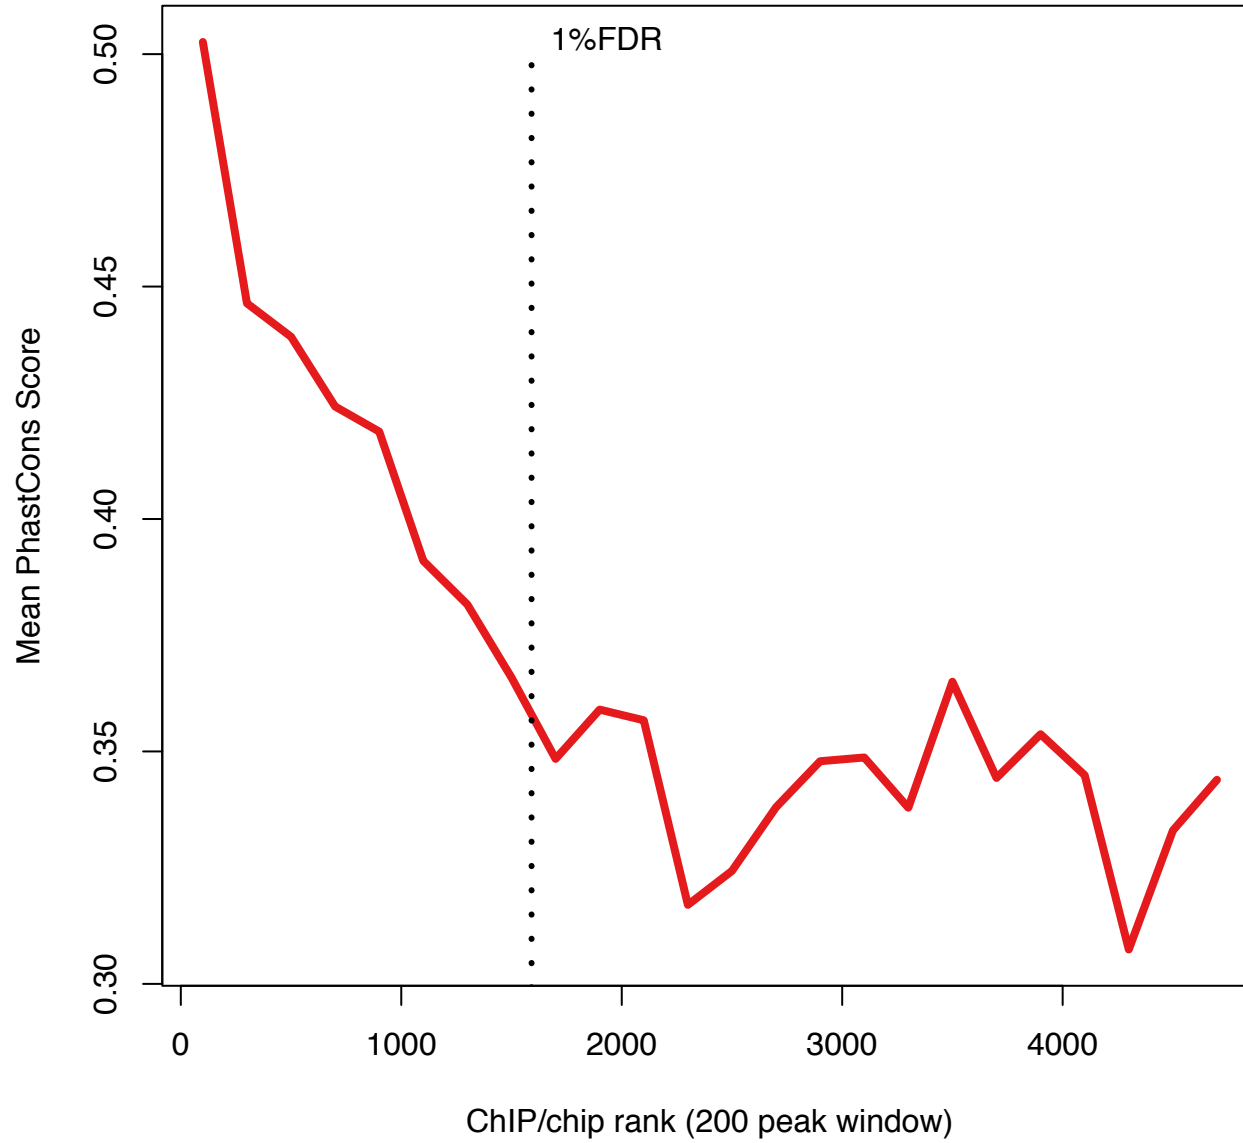

### D\_1 mean PhastCons down ranks

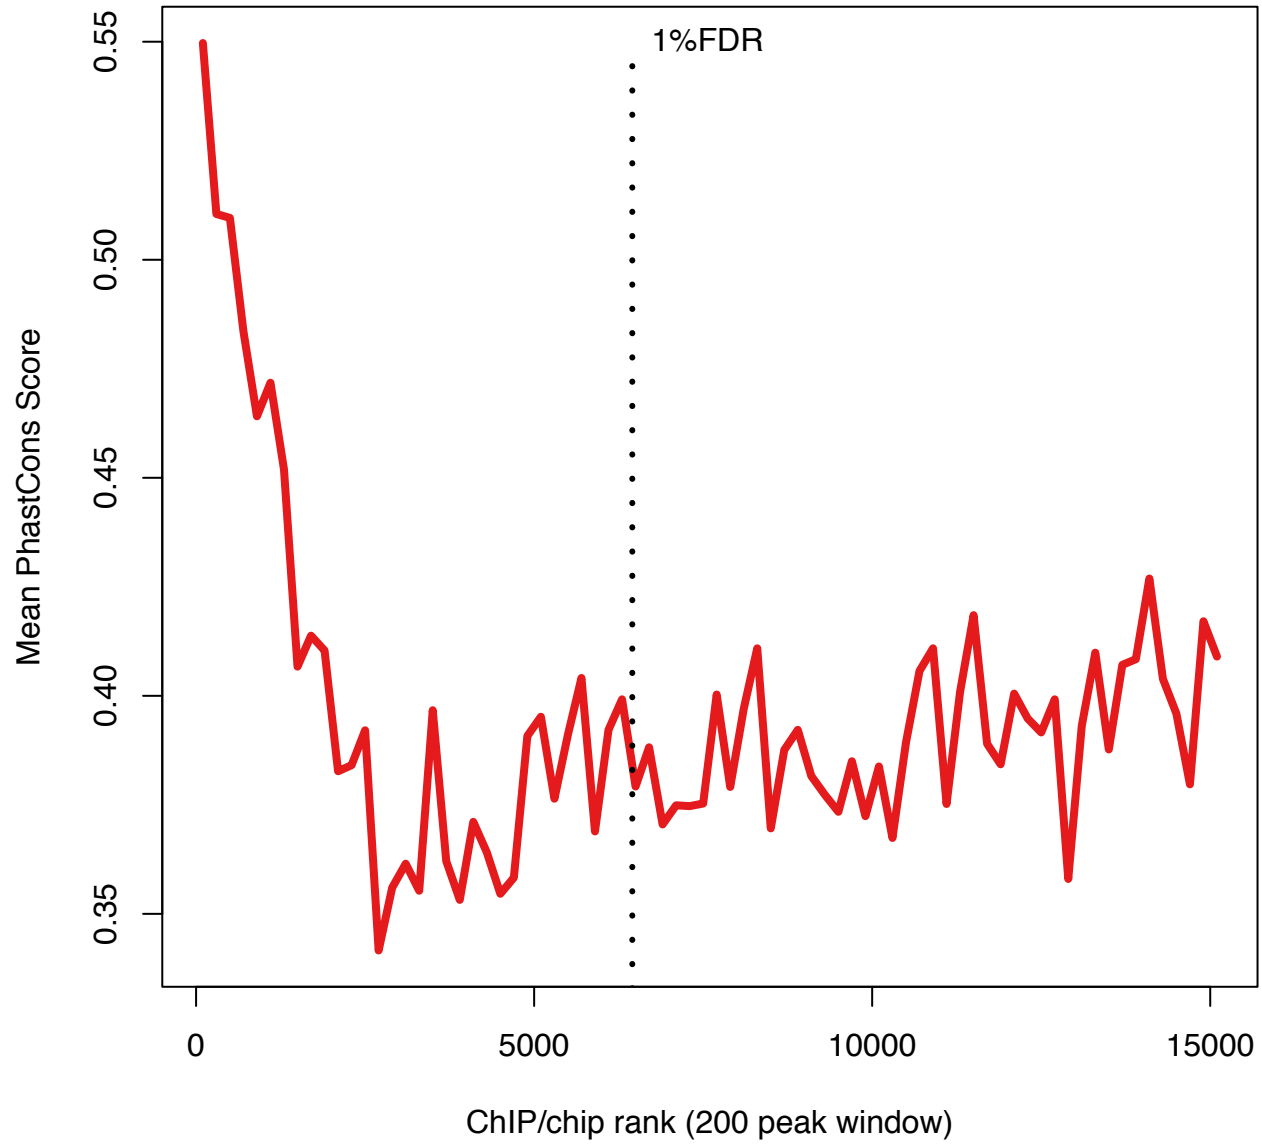

### da\_2 mean PhastCons down ranks

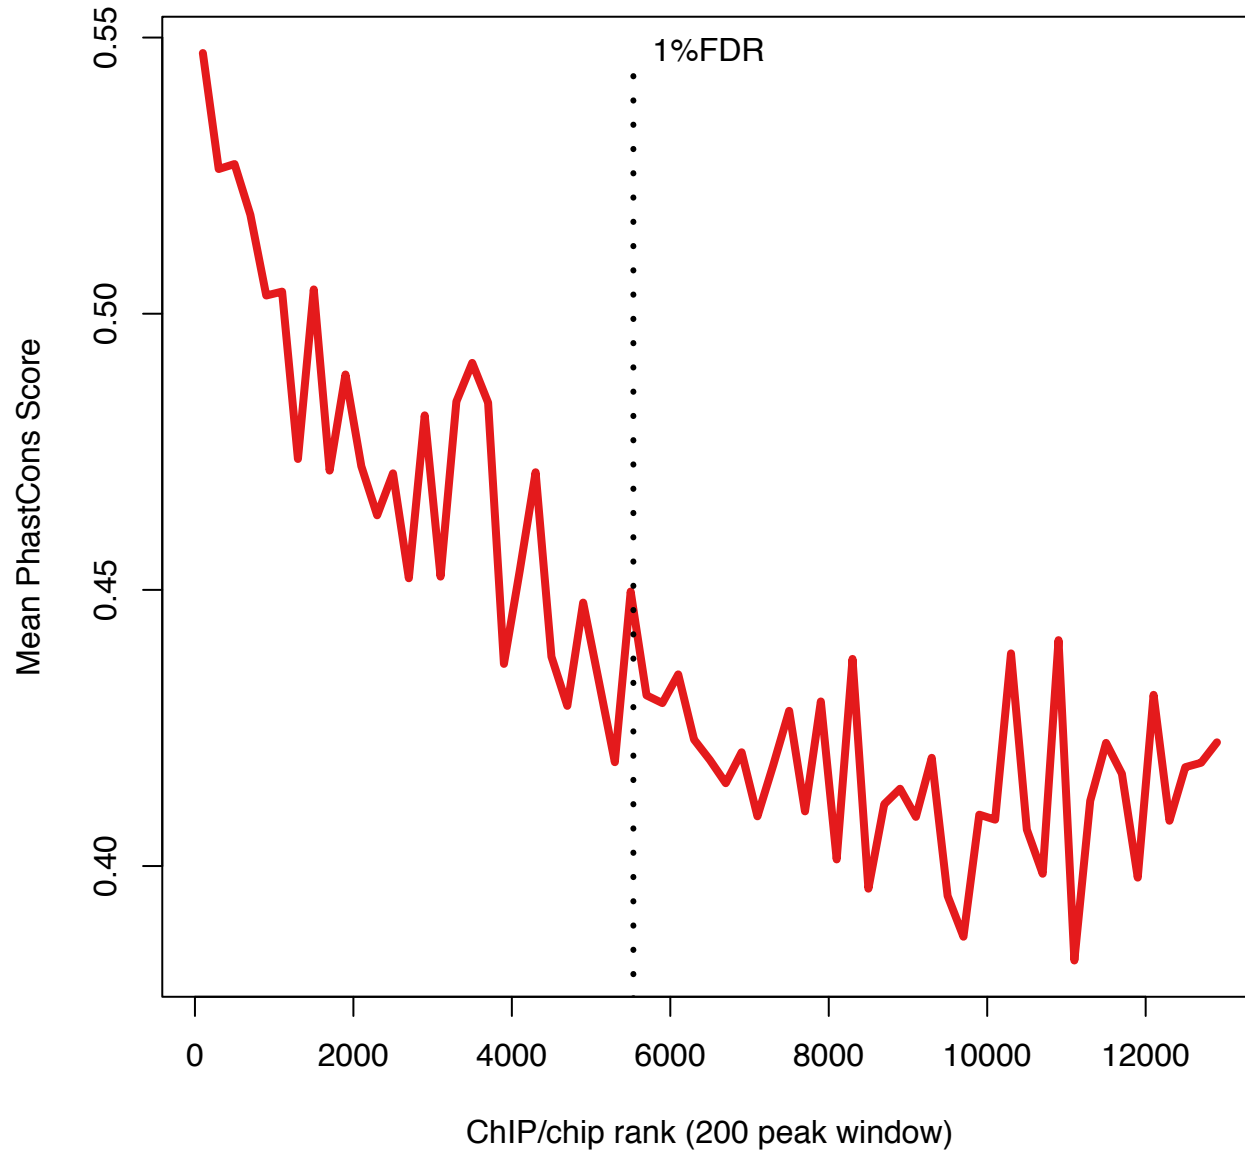

### dl\_3 mean PhastCons down ranks

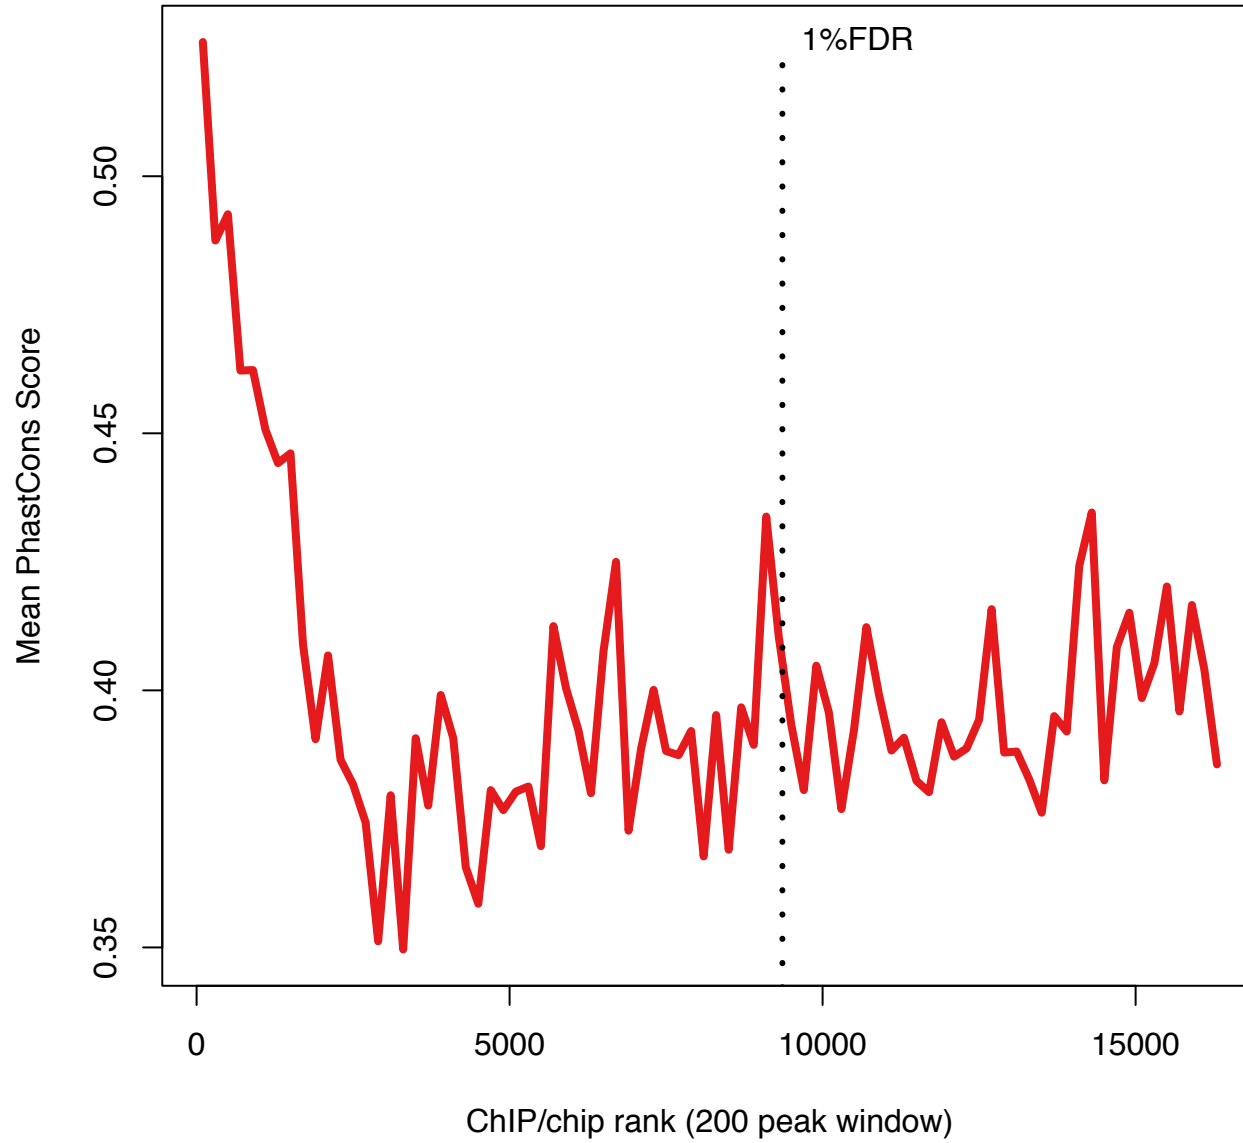

### ftz\_3 mean PhastCons down ranks

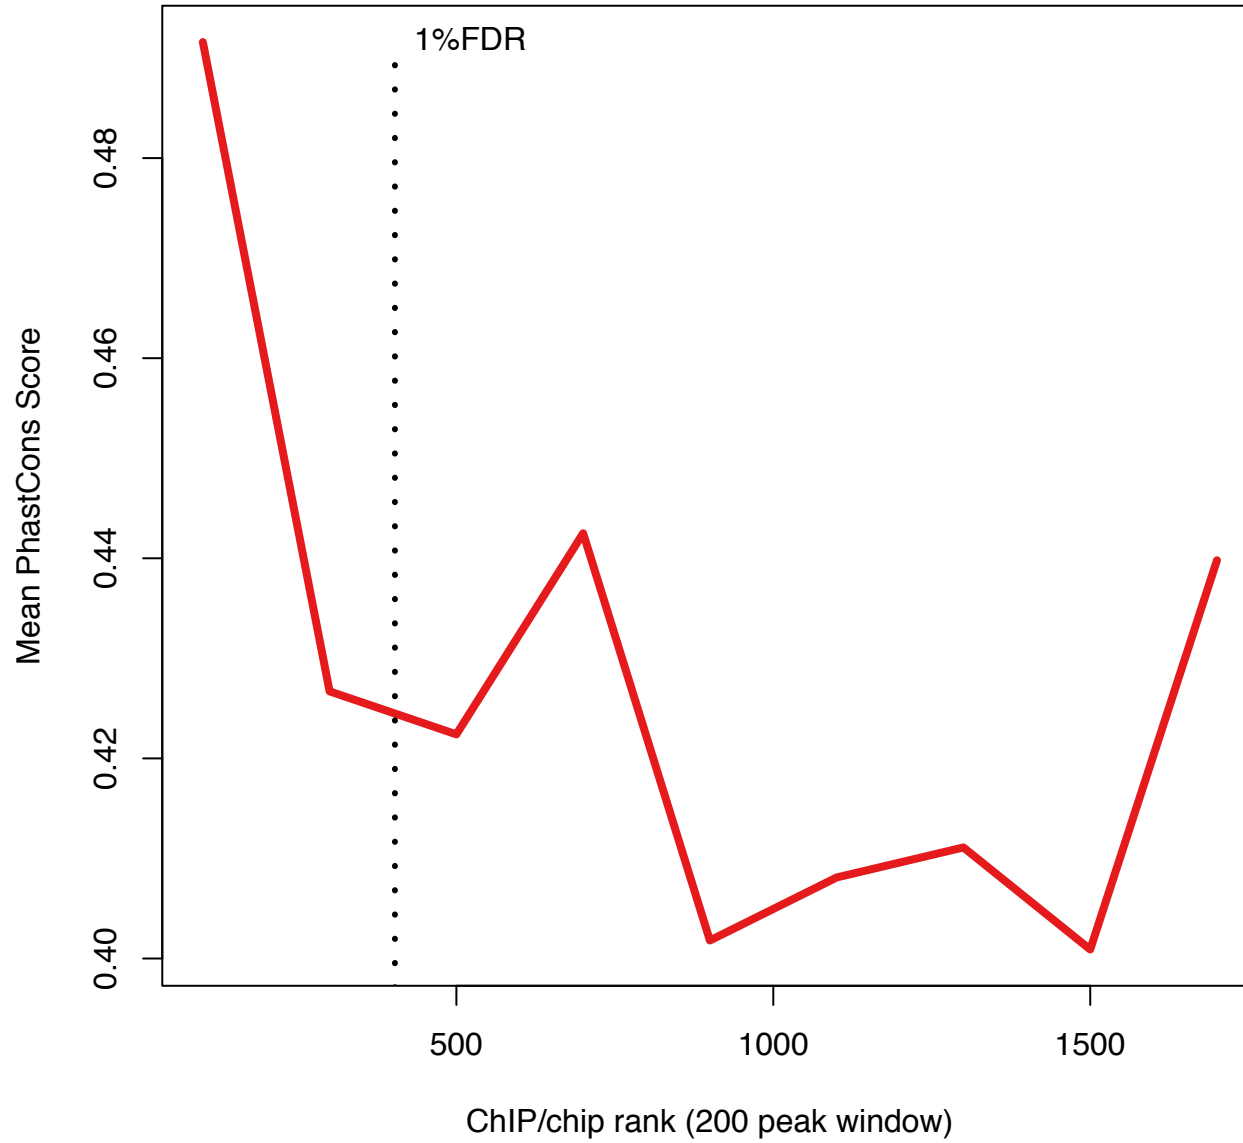

### gt\_2 mean PhastCons down ranks

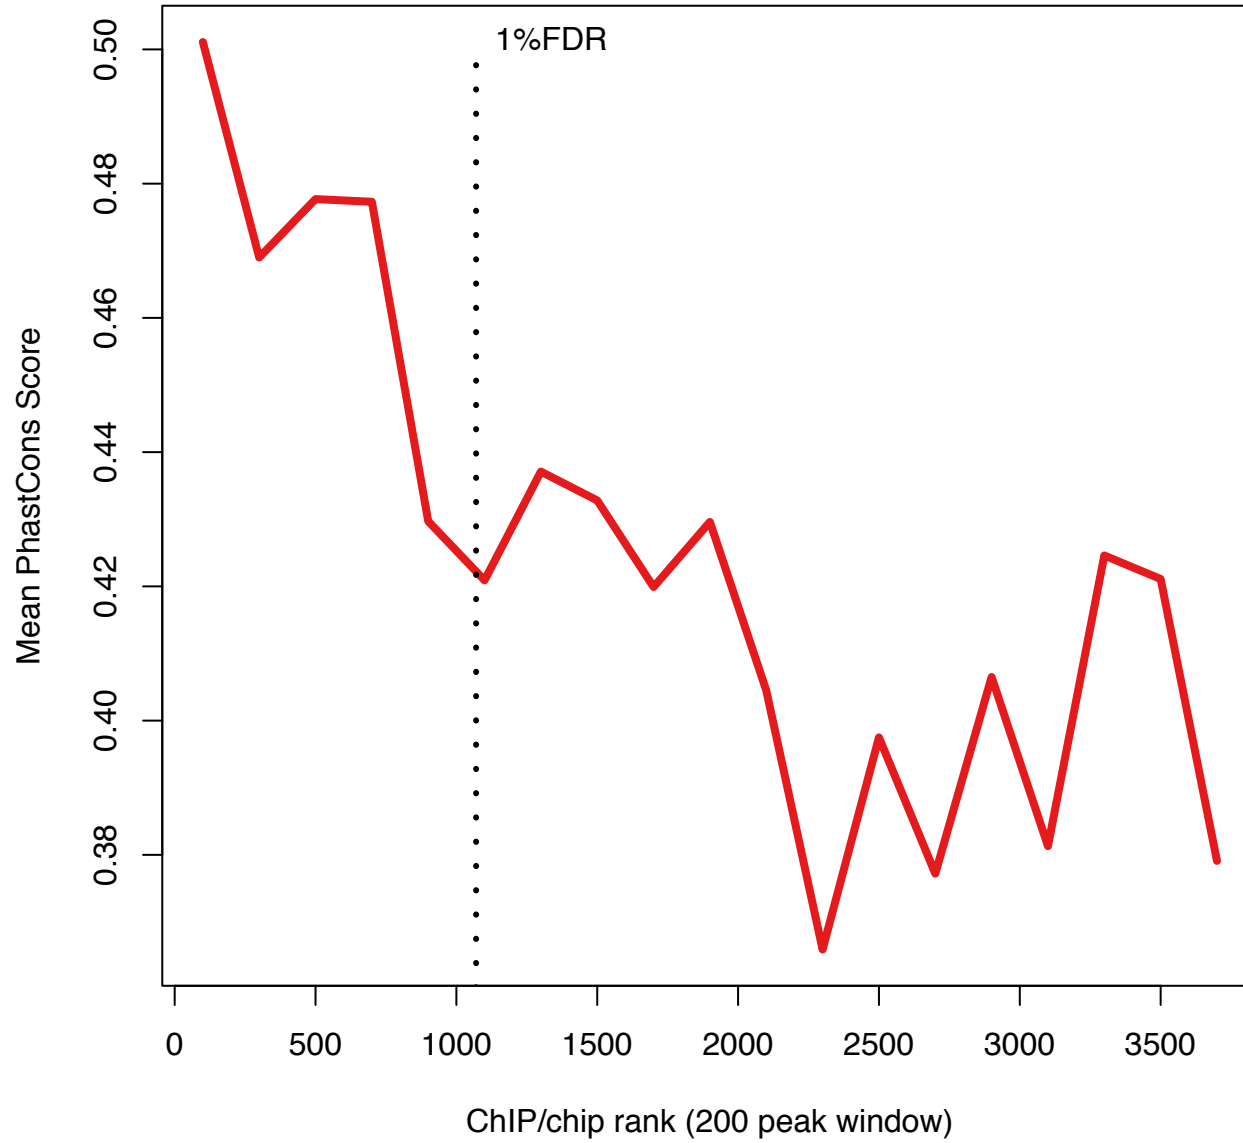

### h\_2 mean PhastCons down ranks

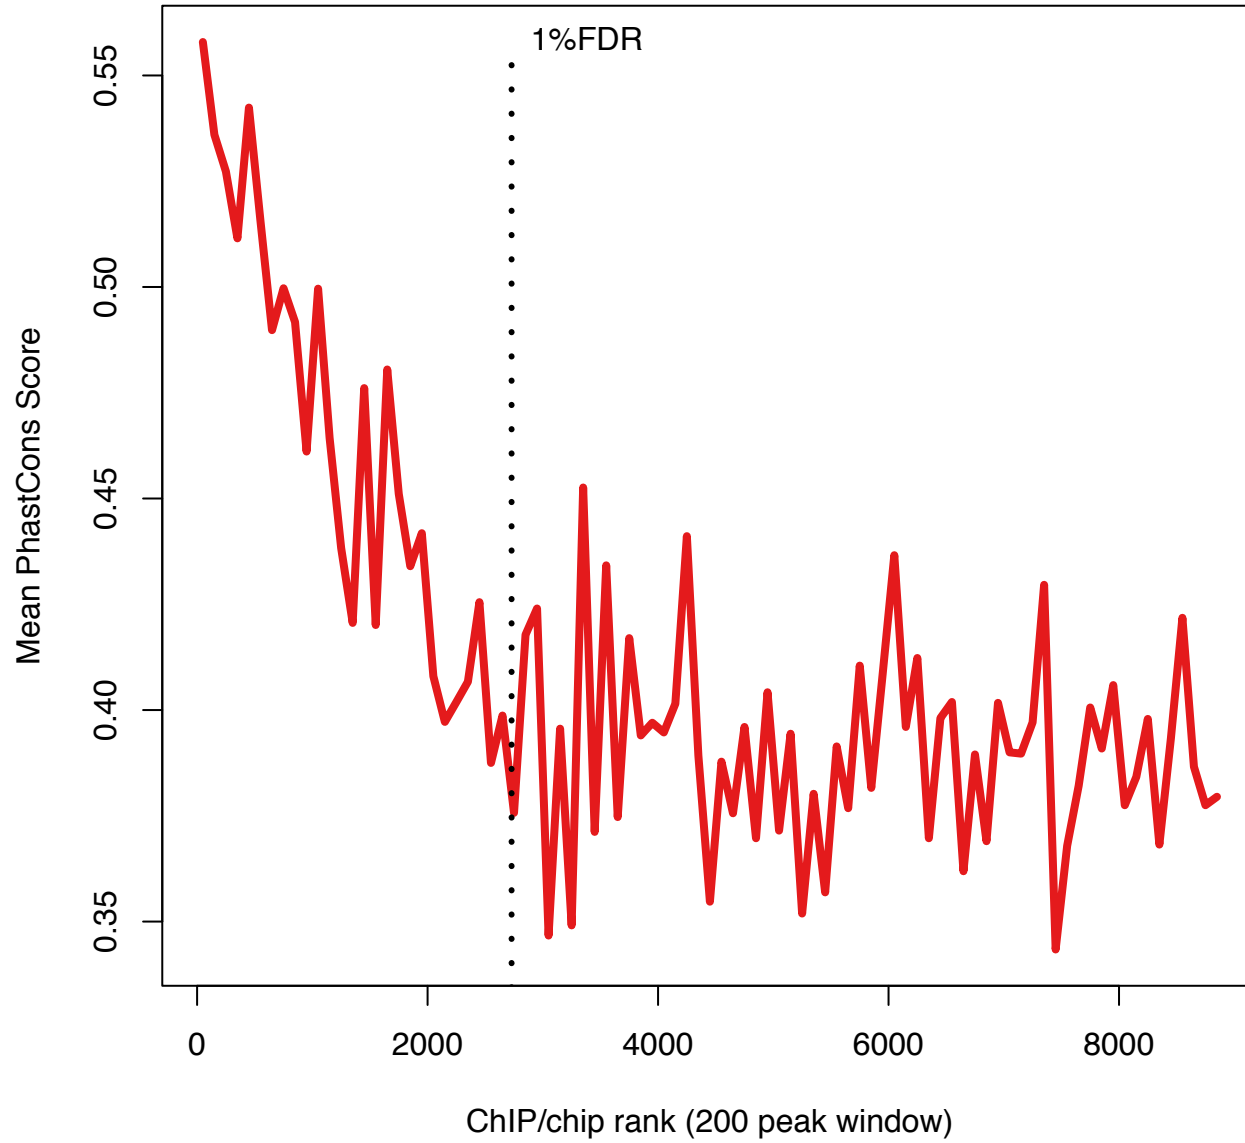



### hb\_1 mean PhastCons down ranks

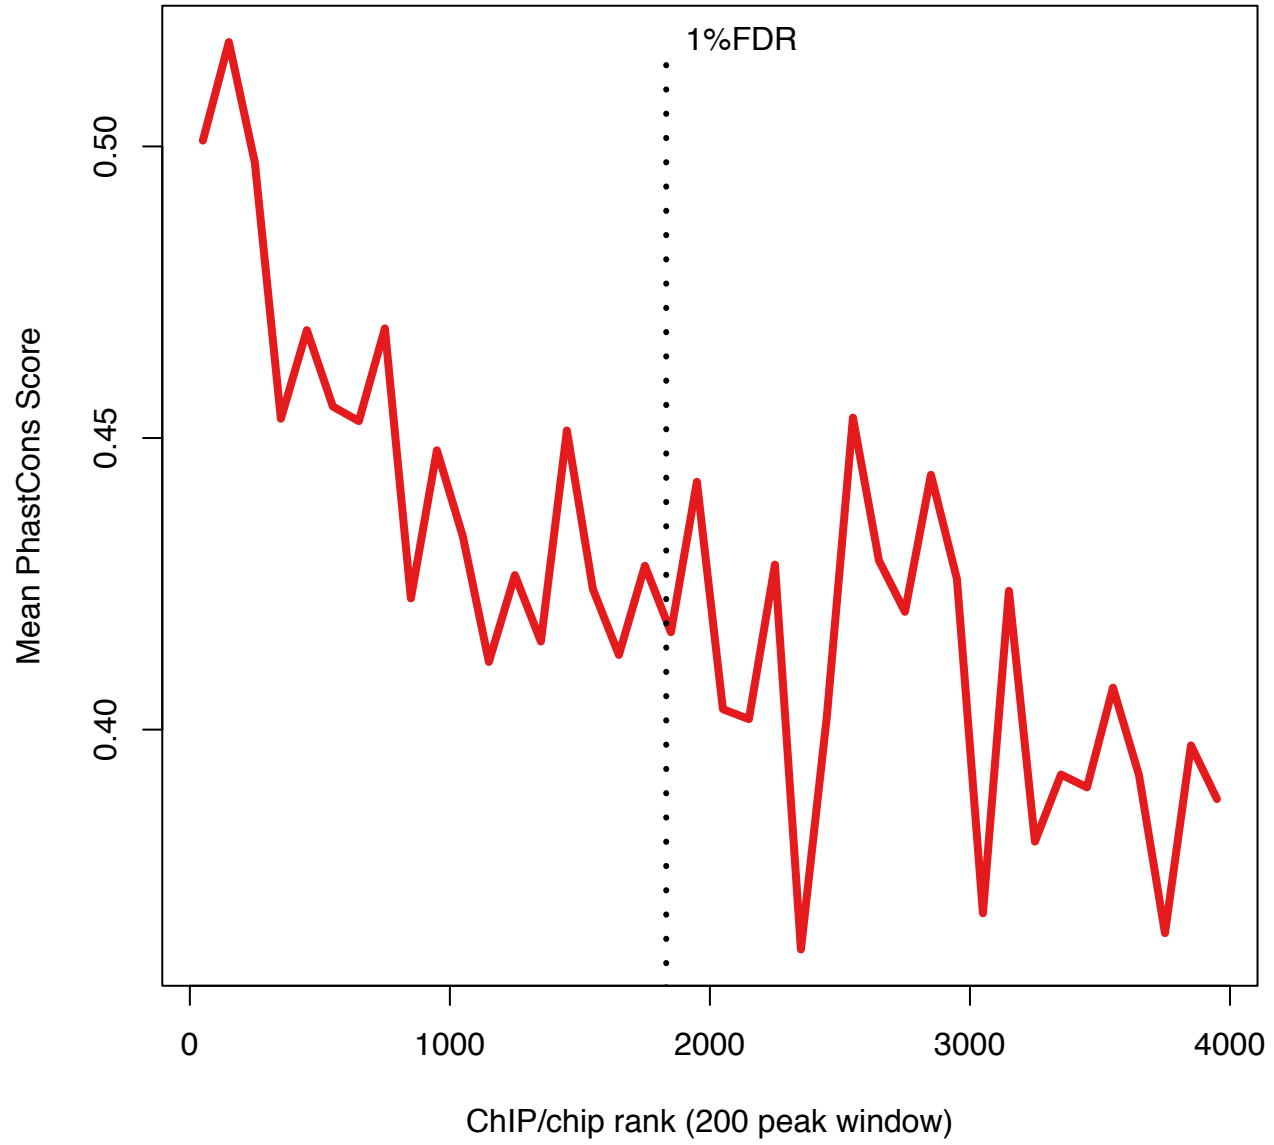

### hkb\_1 mean PhastCons down ranks

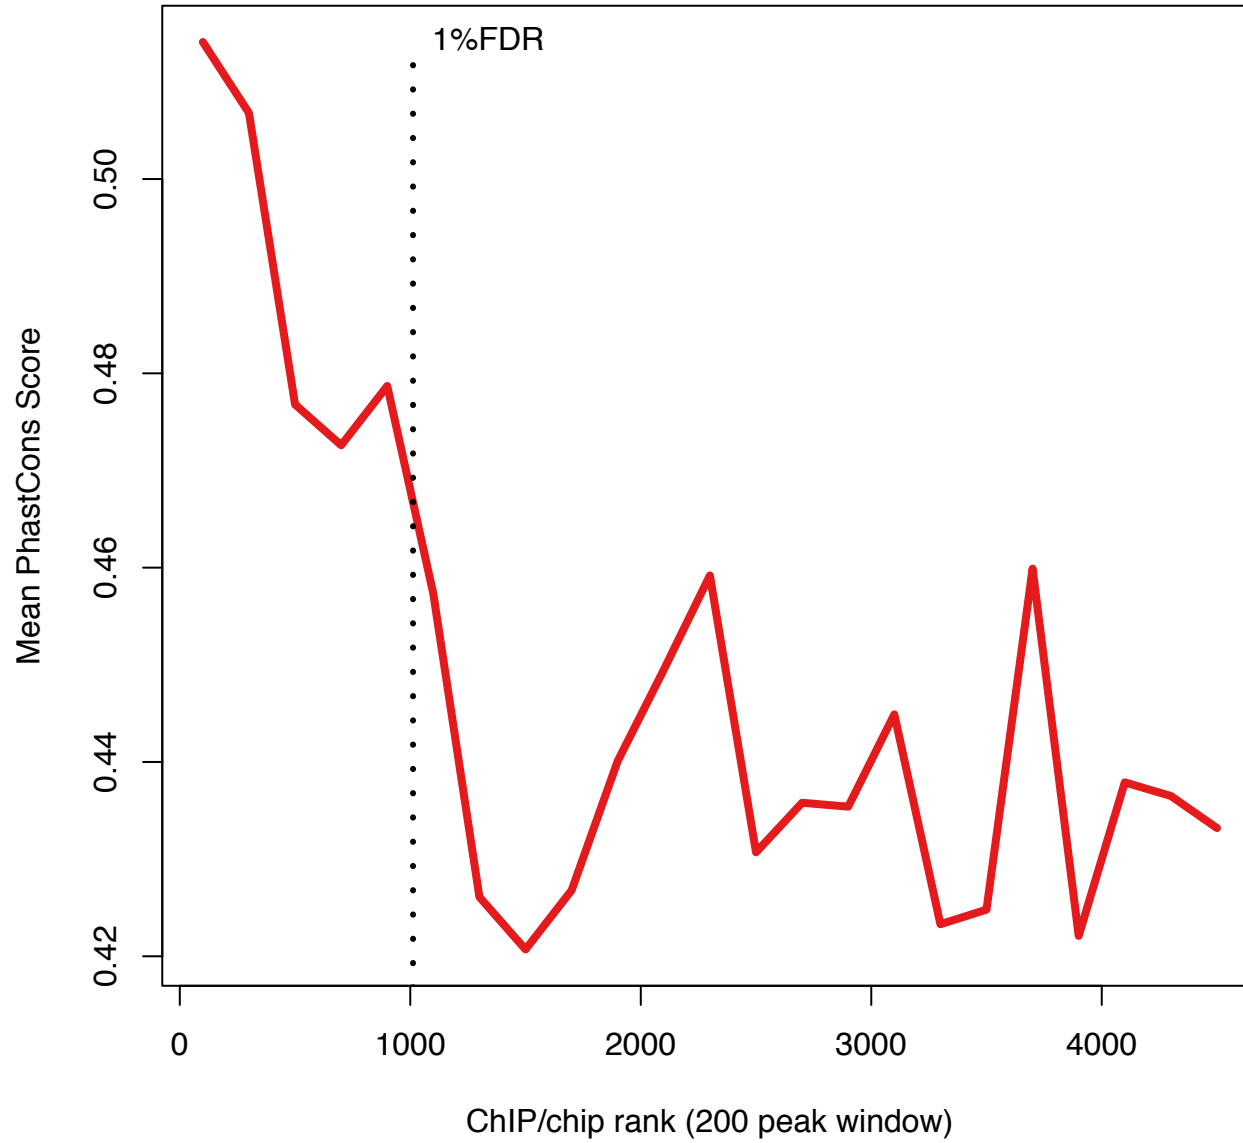

### kni\_2 mean PhastCons down ranks

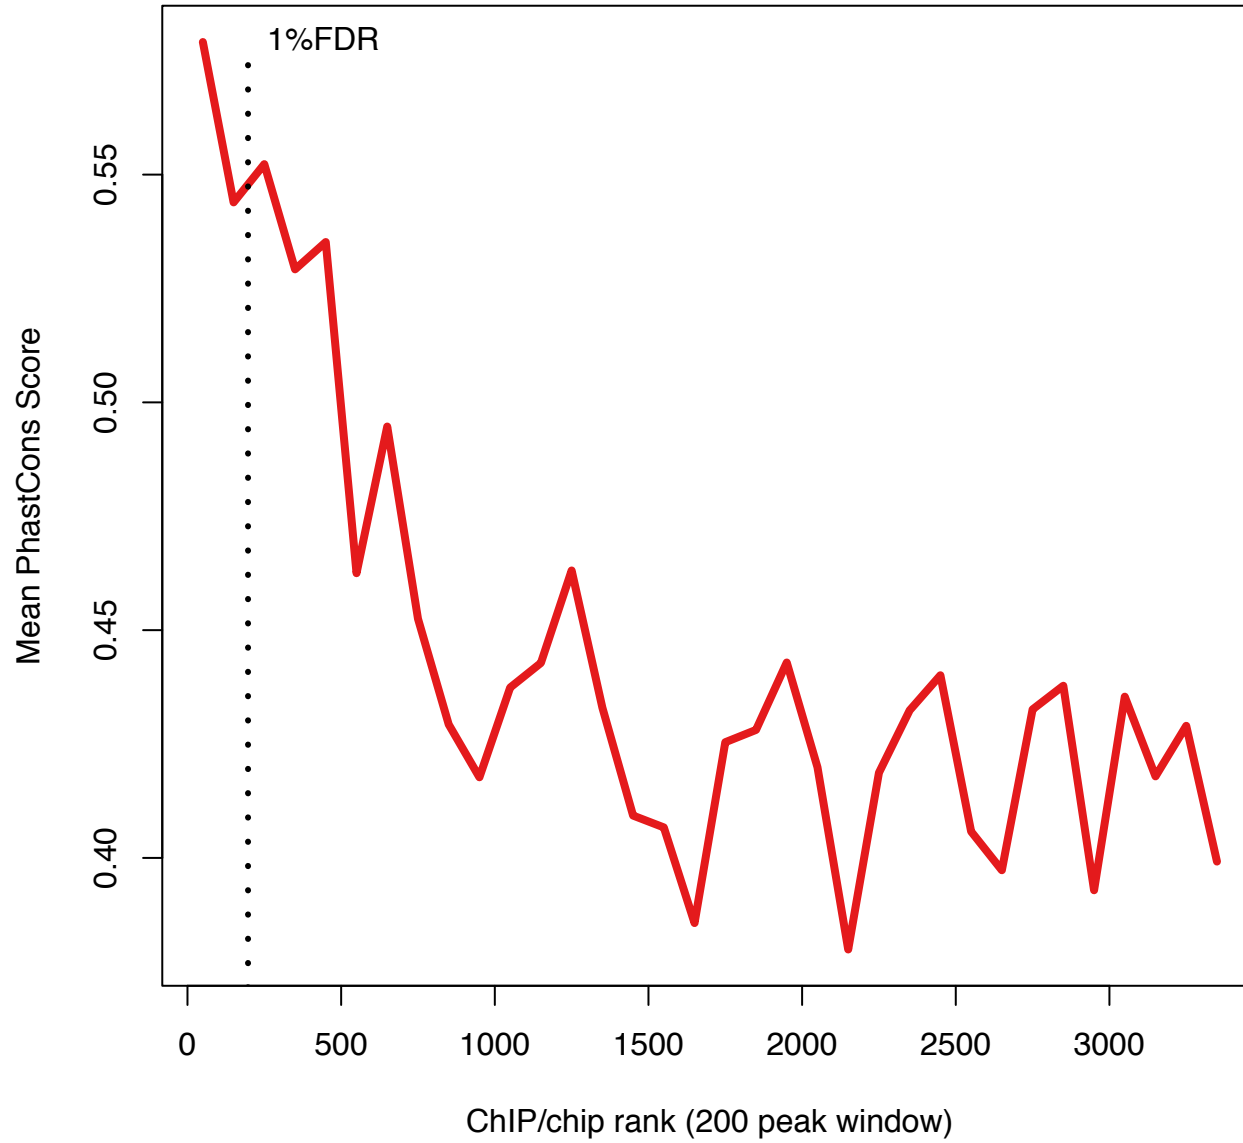

### kr\_2 mean PhastCons down ranks

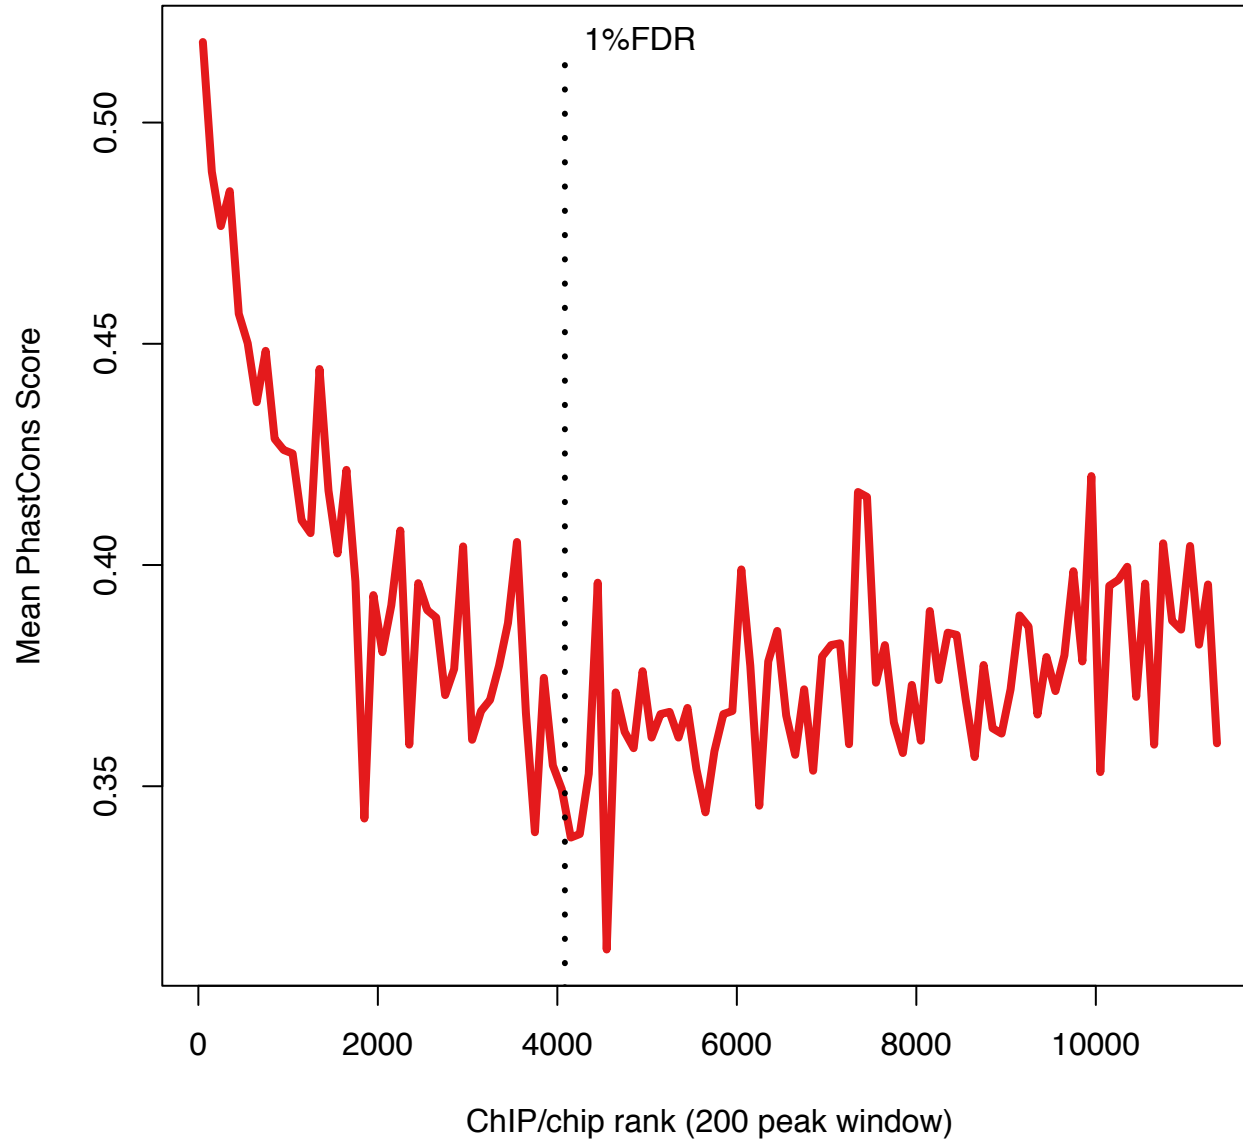

### mad\_2 mean PhastCons down ranks

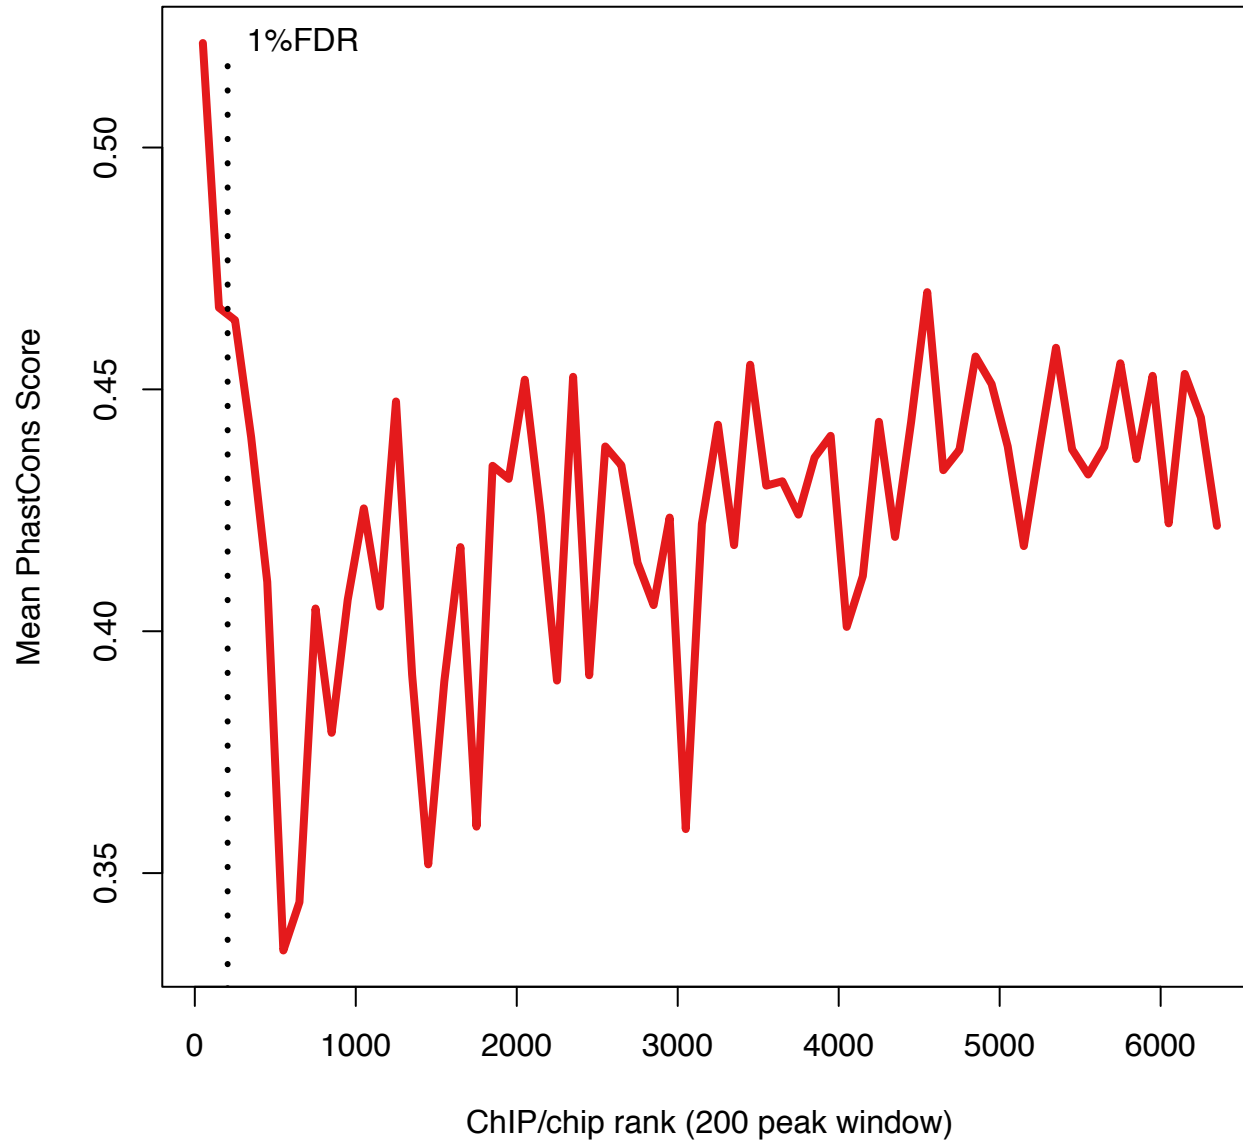

### med\_2 mean PhastCons down ranks

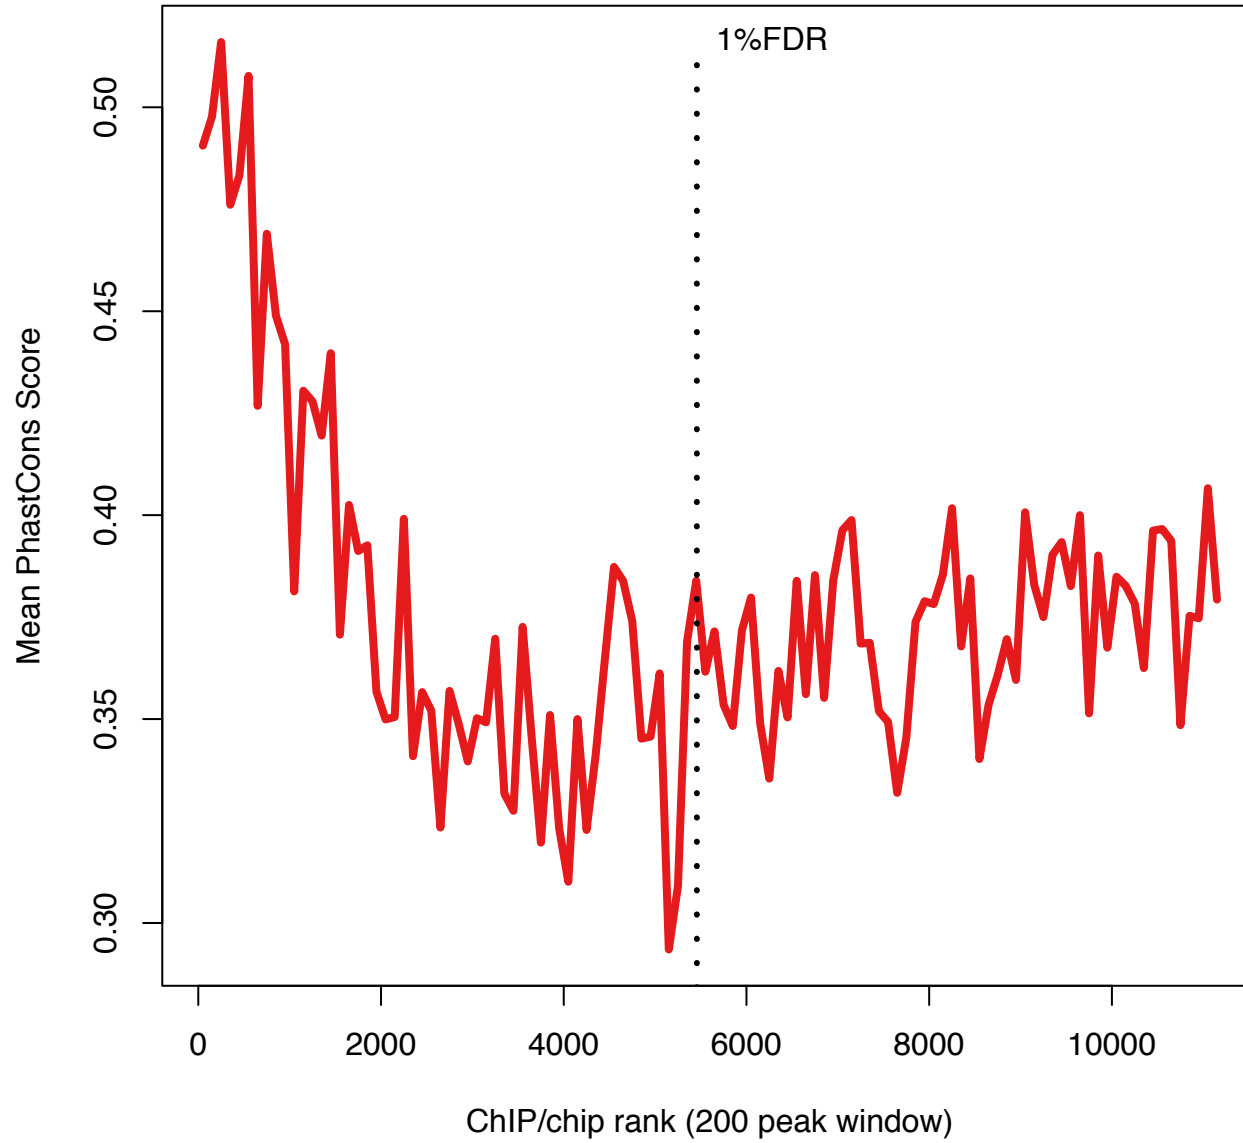

### prd\_FQ mean PhastCons down ranks

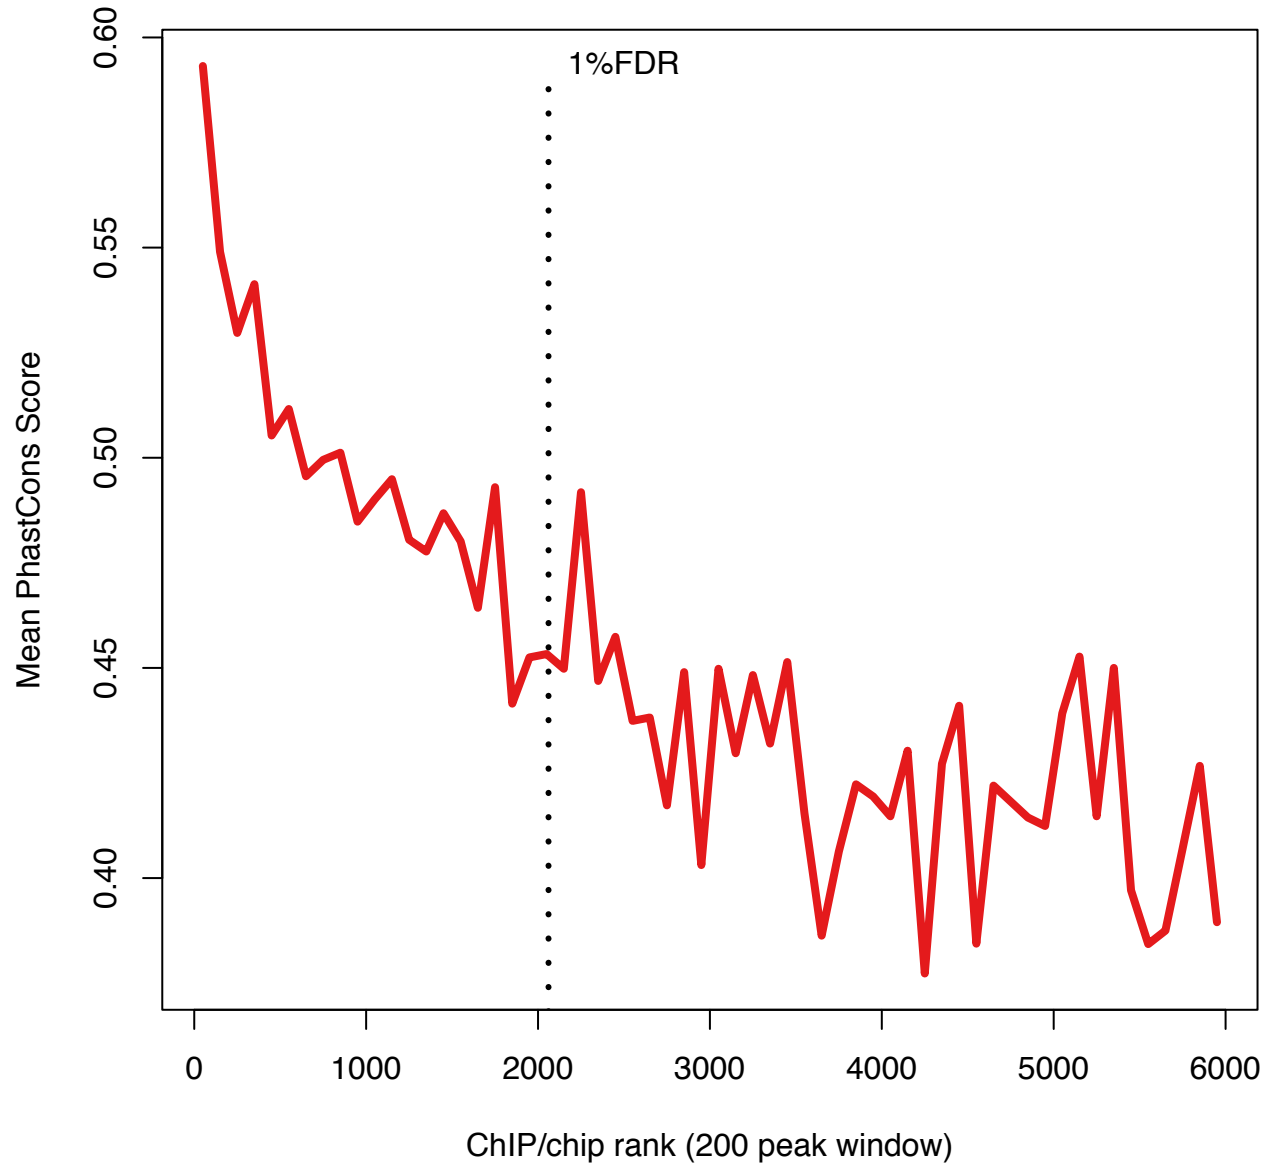

### run\_1 mean PhastCons down ranks

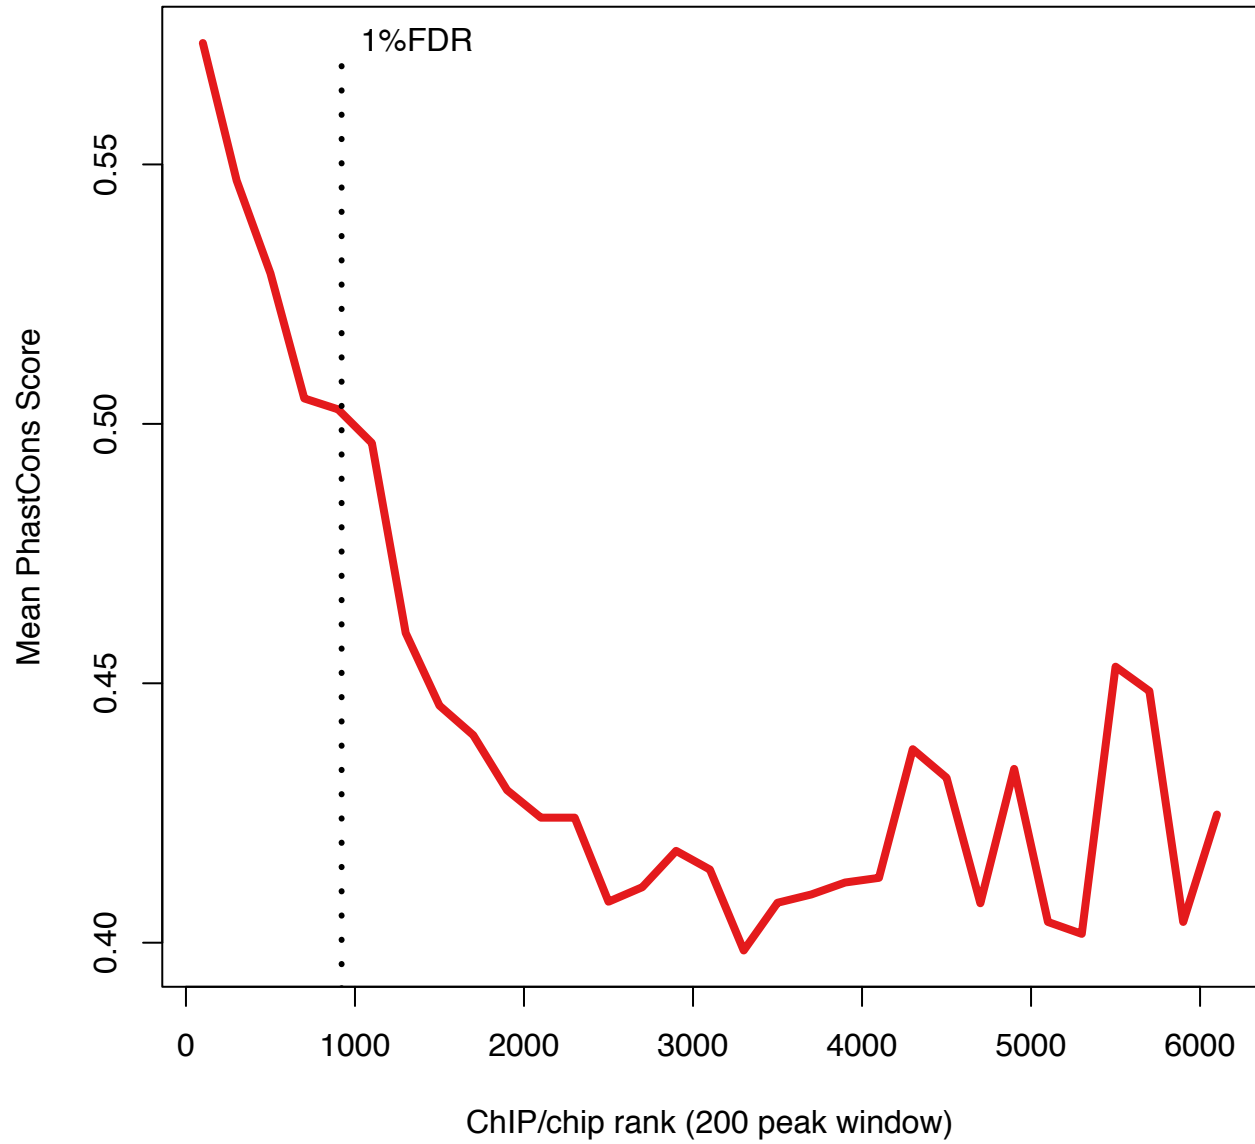



### shn\_2 mean PhastCons down ranks

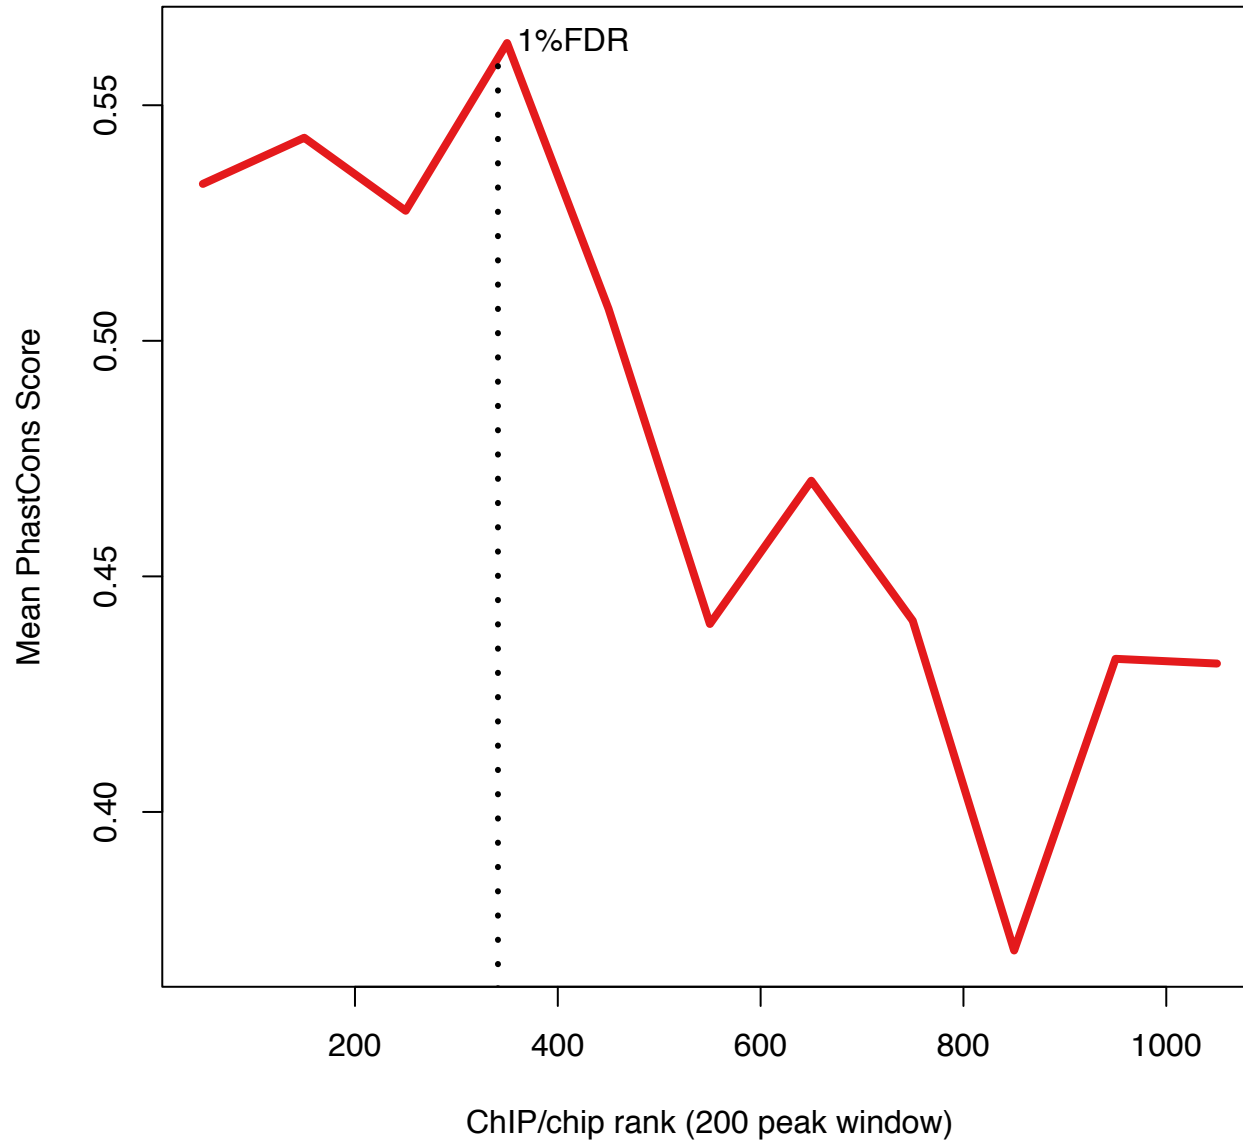

### slp1\_1 mean PhastCons down ranks

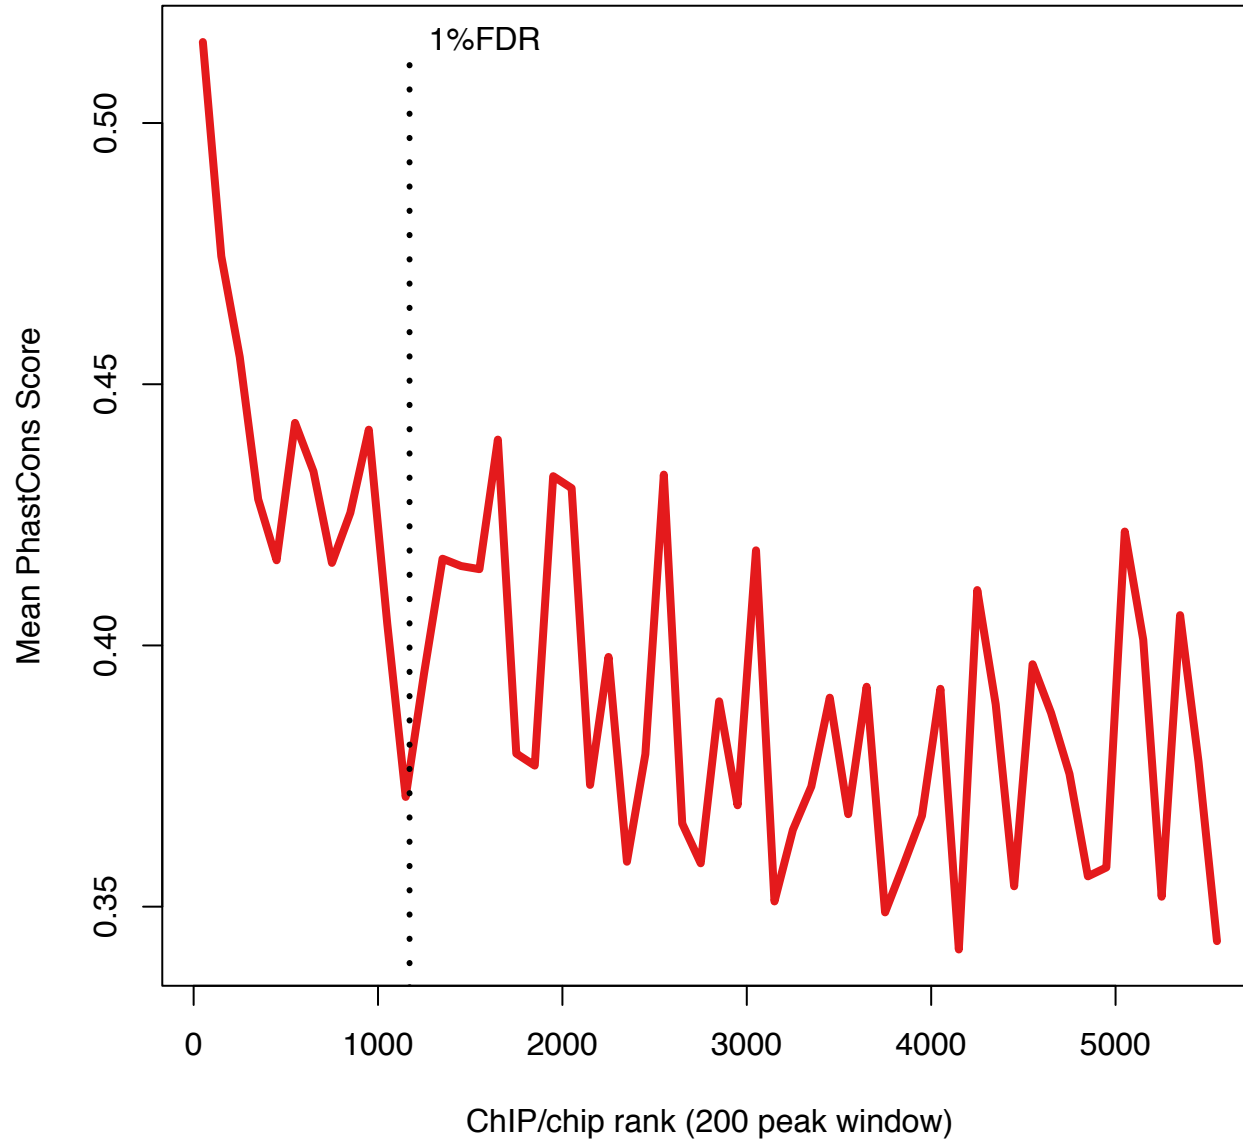

### sna\_2 mean PhastCons down ranks

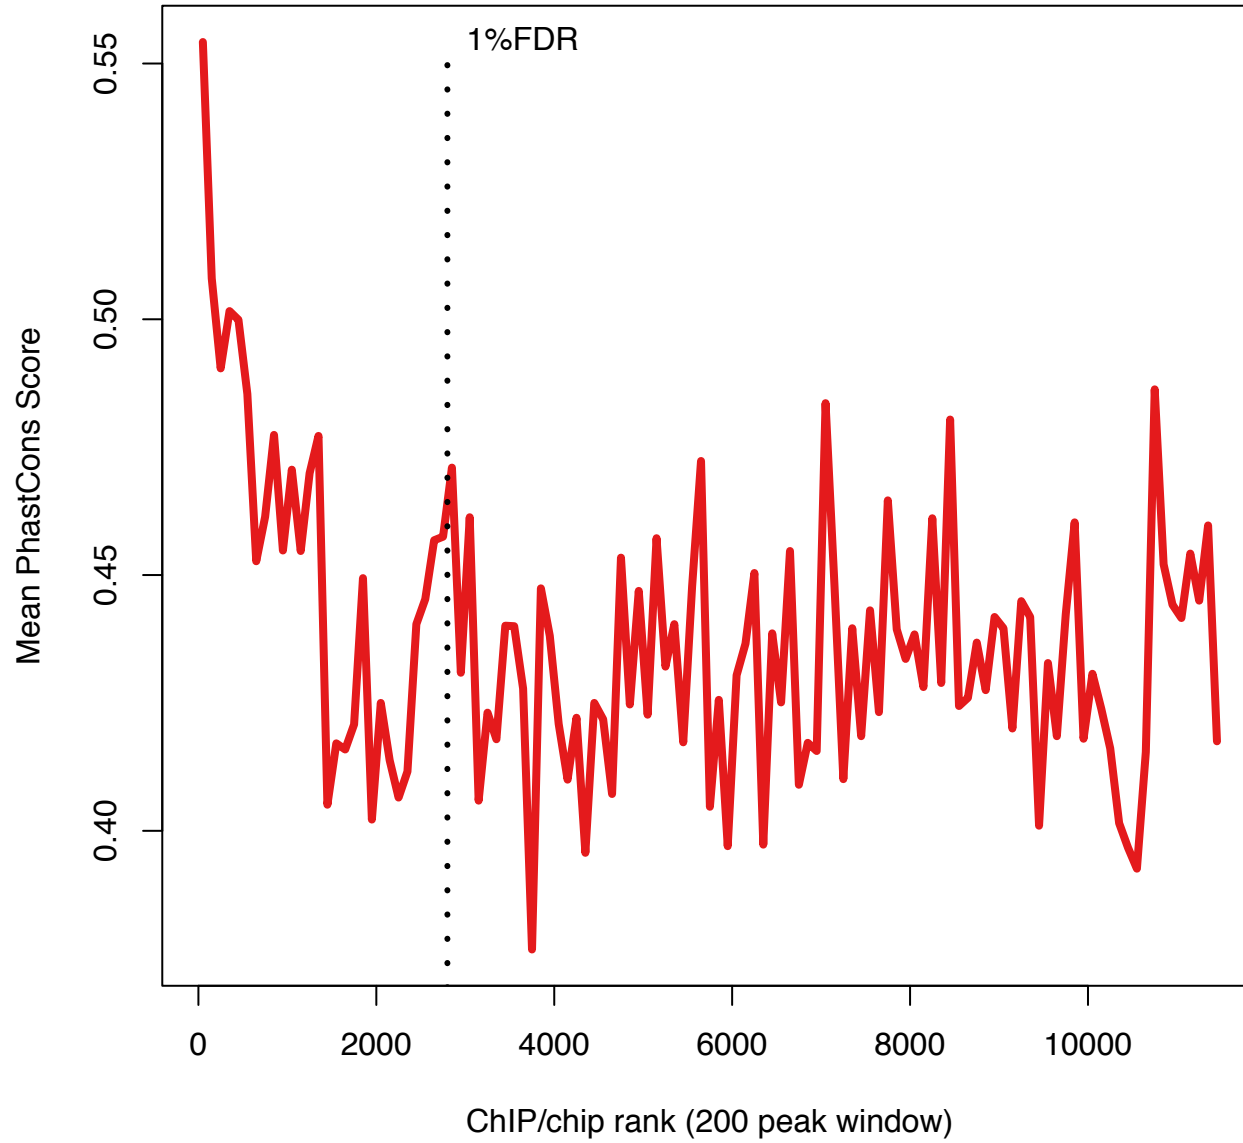

### tII\_1 mean PhastCons down ranks

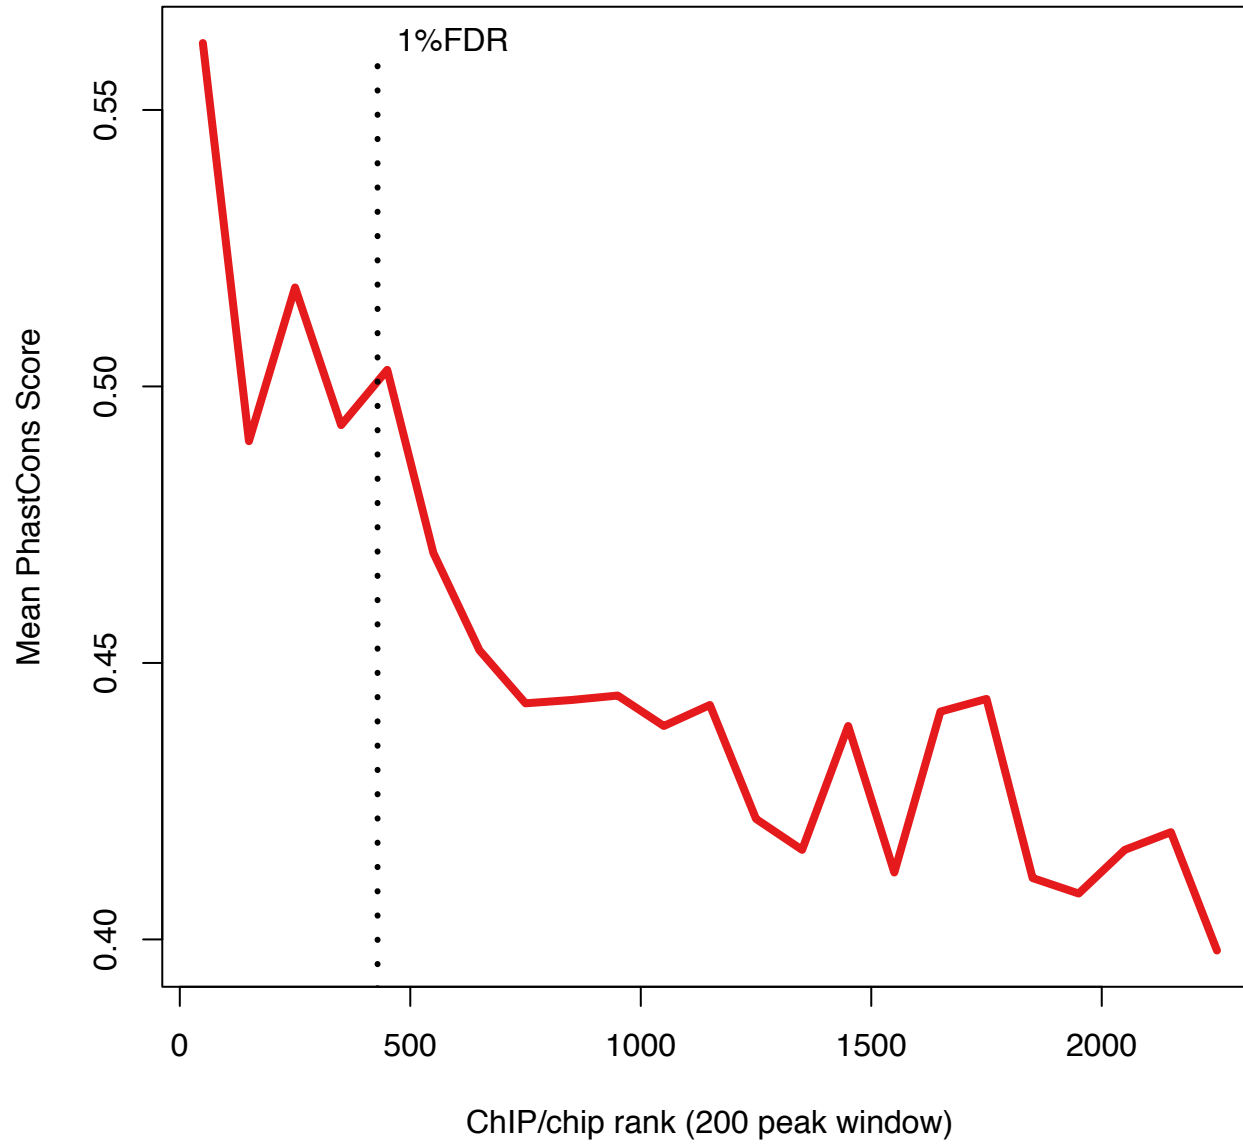

### twi\_2 mean PhastCons down ranks

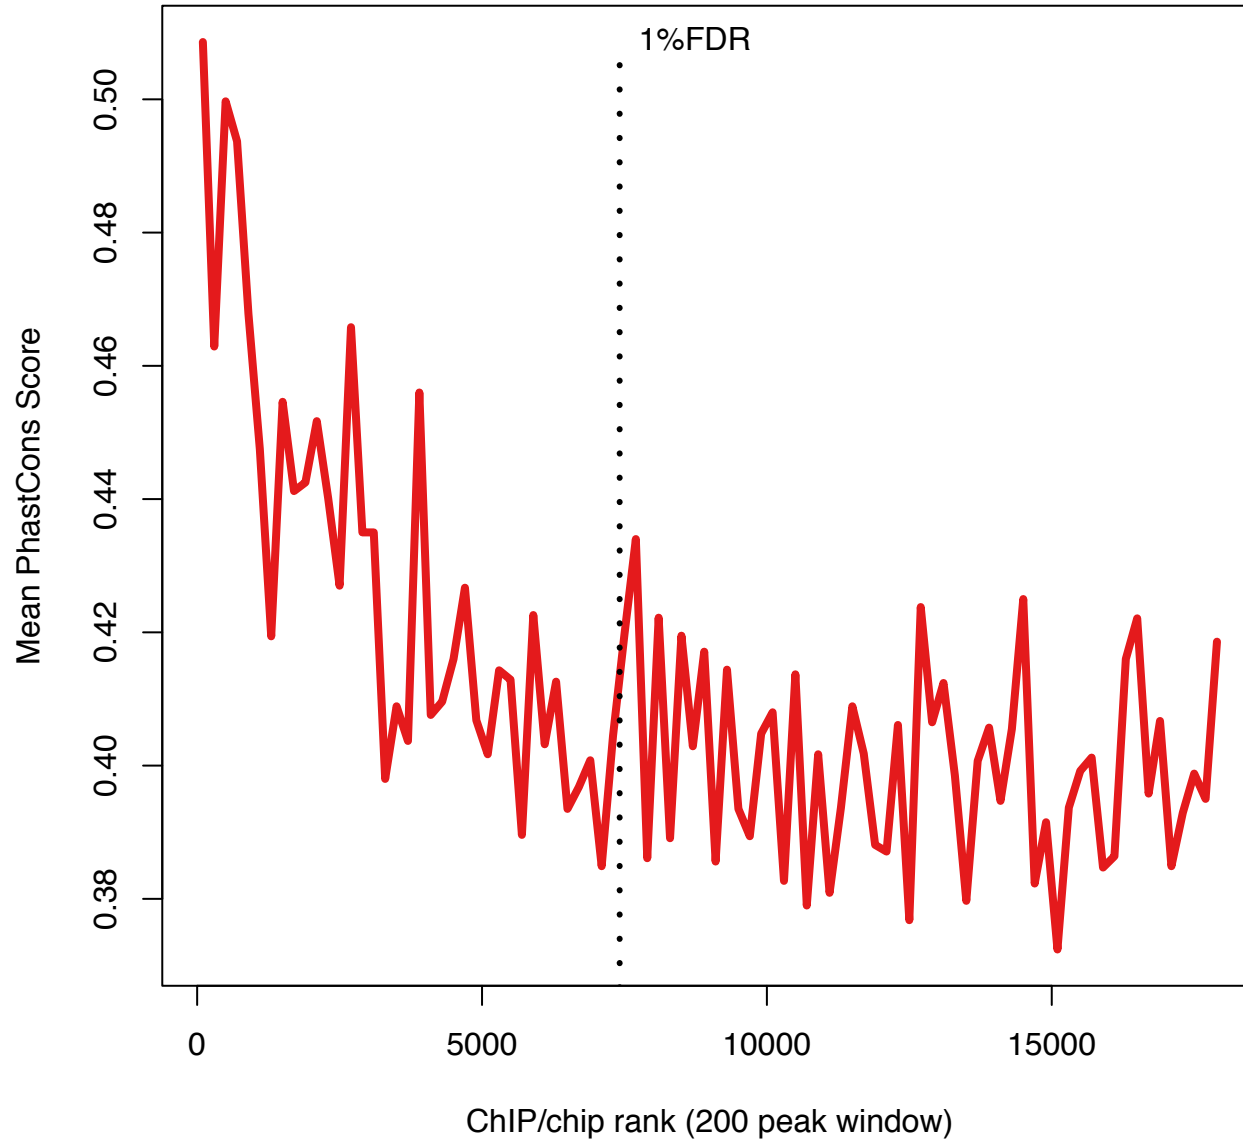

### TFIIB\_1 mean PhastCons down ranks

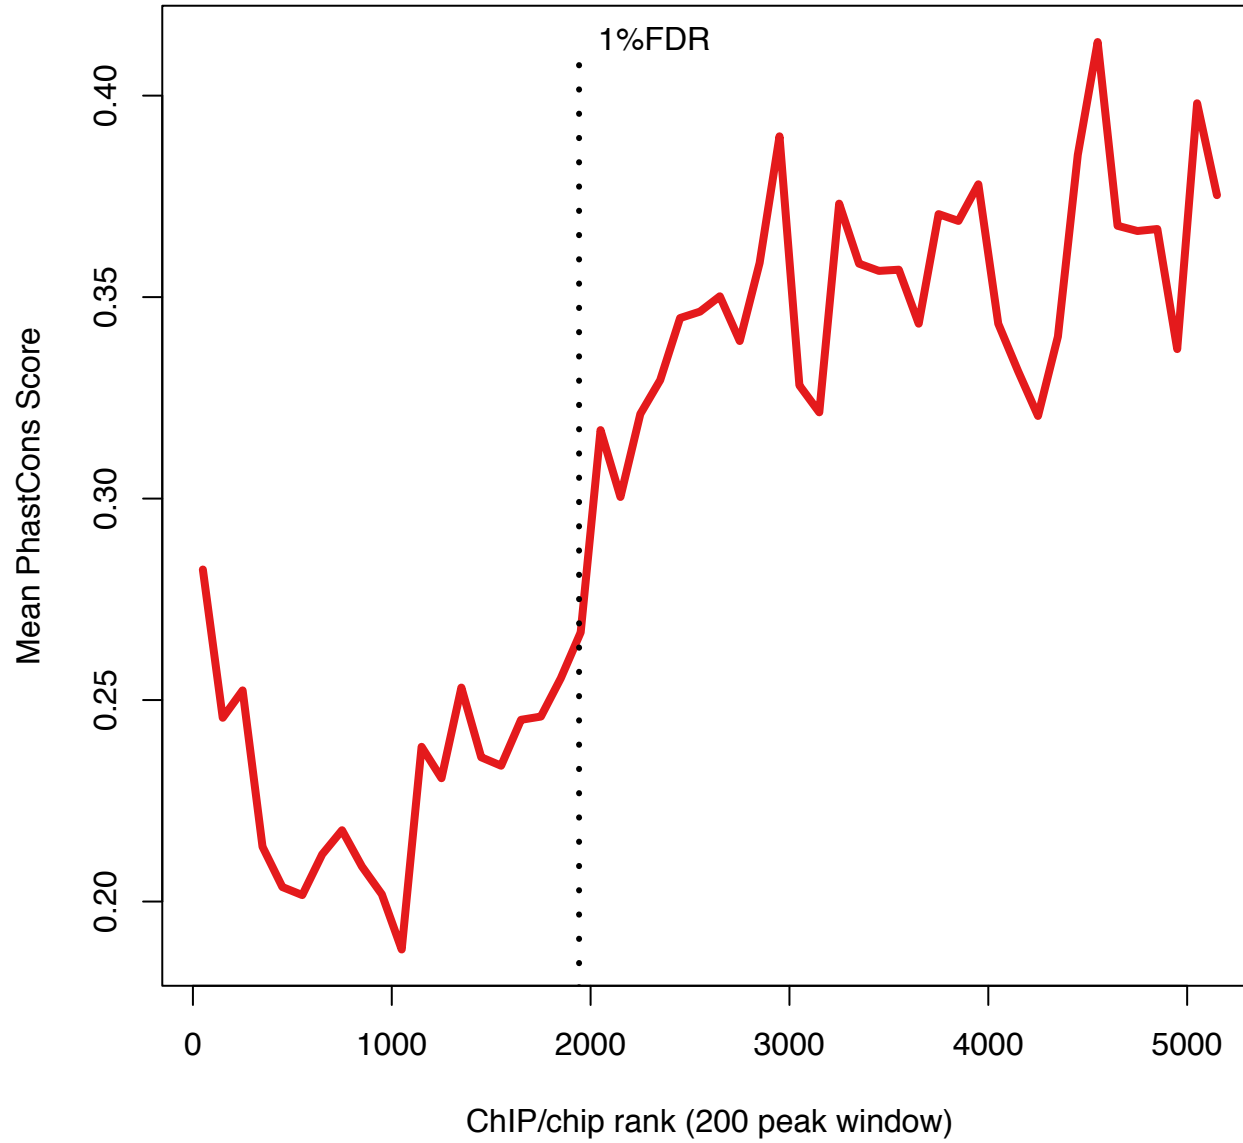

Supplement: 13059_2009_2230_MOESM12_ESM.pdf [file 13059_2009_2230_MOESM12_ESM.pdf]
