# Supplementary material for: Developmental roles of 21 Drosophila transcription factors are determined by quantitative differences in binding to an overlapping set of thousands of genomic regions
Source: Springer Nature journal article supplement (doi:10.1186/gb-2009-10-7-r80), 2009-07-23
Supplement: 13059_2009_2230_MOESM5_ESM.pdf [file 13059_2009_2230_MOESM5_ESM.pdf]

### Bcd 2

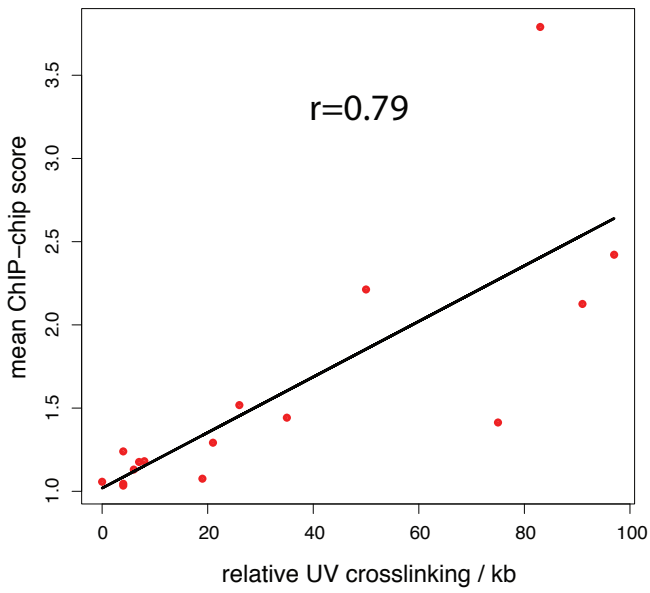

### Ftz

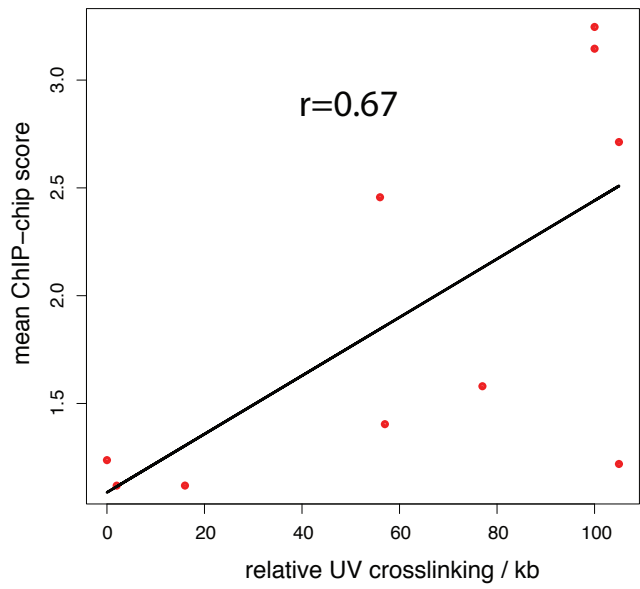

### Prd 1

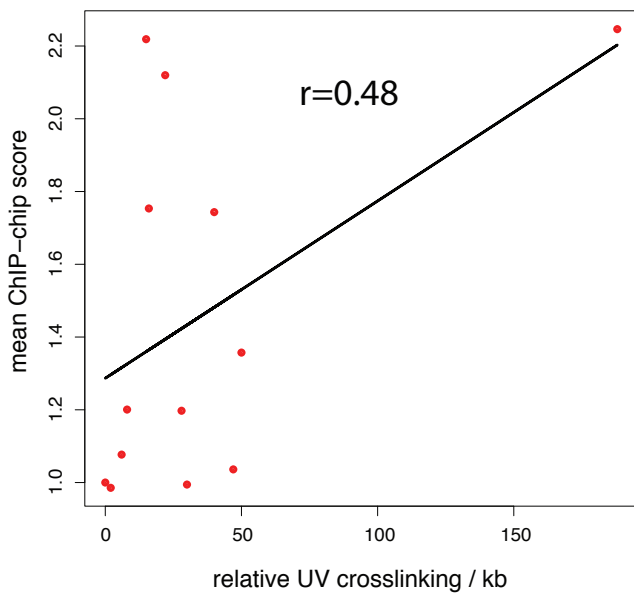

**Additional data file 5.** Scatter plots comparing formaldehyde ChIP/chip and southern blot based UV crosslinking data. Relative levels of UV crosslinking per kb were measured to a series of genomic restriction fragments (*x*-axis, Carr and Biggin, 1999 [31]). The mean ChIP/chip score across these same genomic regions was calculated (*y*-axis, this paper). The Pearson correlation coefficients (*r*) are given.
