# Supplementary material for: Developmental roles of 21 Drosophila transcription factors are determined by quantitative differences in binding to an overlapping set of thousands of genomic regions
Source: Springer Nature journal article supplement (doi:10.1186/gb-2009-10-7-r80), 2009-07-23

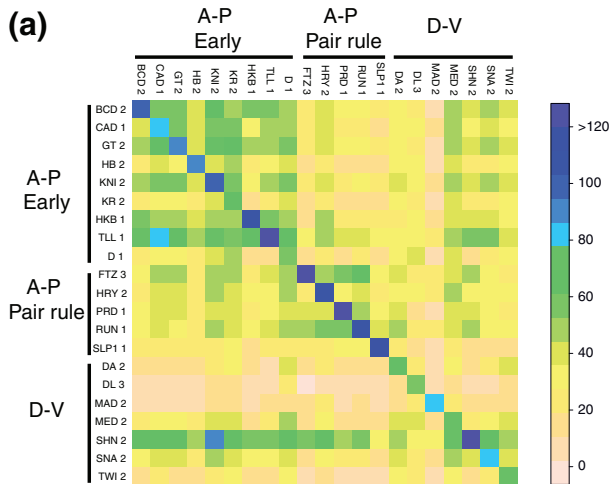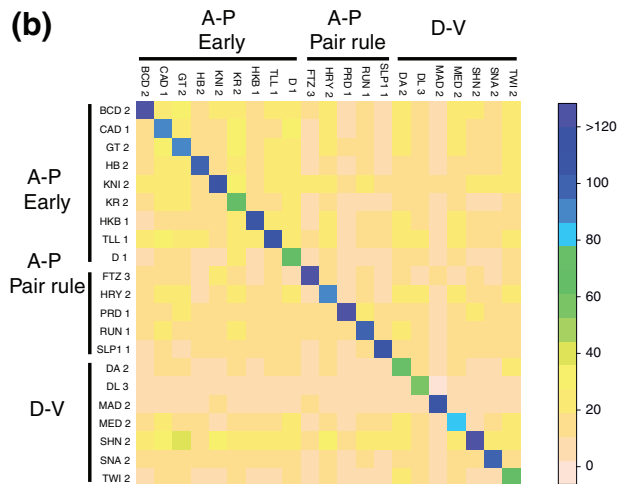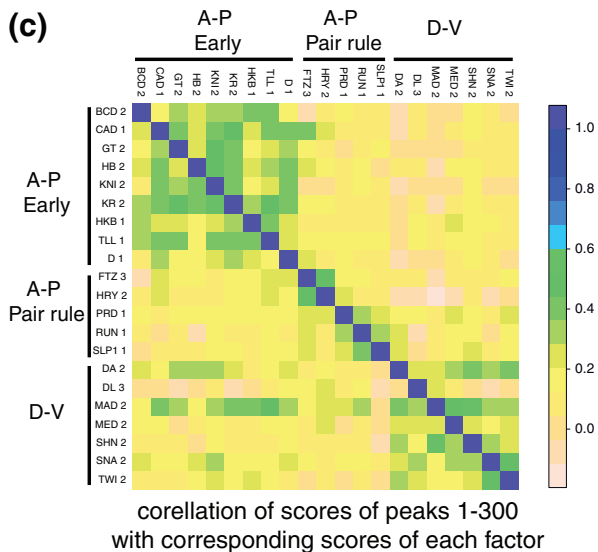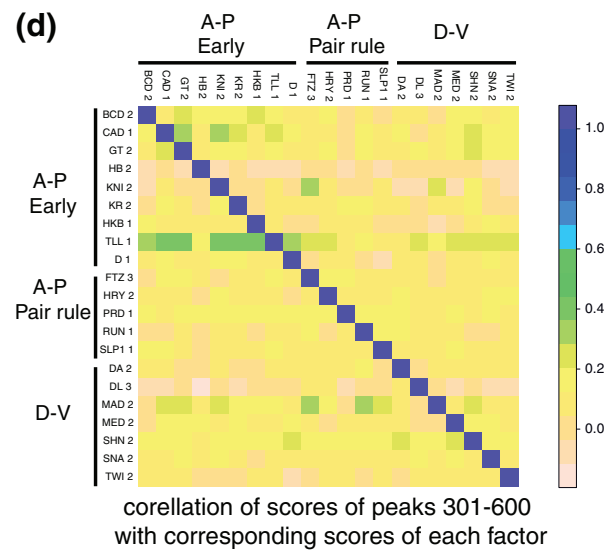

Supplement: 13059_2009_2230_MOESM27_ESM.pdf [file 13059_2009_2230_MOESM27_ESM.pdf]
